# Supplementary material for: Aluminium alkyl complexes supported by imino-phosphanamide ligand as precursors for catalytic guanylation reactions of carbodiimides
Source: Royal Society of Chemistry journal article supplement (doi:10.1039/d2ra00242f), 2022-01-01
Supplement: d2ra00242f1.pdf [file d2ra00242f1.pdf]

## *Supporting Information for*

### **Aluminium alkyl complexes with imidazolin-2-phosphanamidinate ligand as precursor for catalytic guanylation reactions of carbodiimides**

#### **Contents**

1. Table TS1. Crystallographic data and refinement parameters of **1b**, **1c**, **2a**, **2b** and **2c**.
2. Figure FS1.  $^1\text{H}$  NMR (300 MHz, 25 °C,  $\text{C}_6\text{D}_6$ ) spectrum of **1b**.
3. Figure FS2.  $^{31}\text{P}\{^1\text{H}\}$  NMR (121.5 MHz, 25 °C,  $\text{C}_6\text{D}_6$ ) spectrum of **1b**.
4. Figure FS3.  $^{13}\text{C}\{^1\text{H}\}$  NMR (75 MHz, 25 °C,  $\text{C}_6\text{D}_6$ ) spectrum of **1b**.
5. Figure FS4.  $^1\text{H}$  NMR (300 MHz, 25 °C,  $\text{C}_6\text{D}_6$ ) spectrum of **1c**.
6. Figure FS5.  $^{31}\text{P}\{^1\text{H}\}$  NMR (121.5 MHz, 25 °C,  $\text{C}_6\text{D}_6$ ) spectrum of **1c**.
7. Figure FS6.  $^{13}\text{C}\{^1\text{H}\}$  NMR (75 MHz, 25 °C,  $\text{C}_6\text{D}_6$ ) spectrum of **1c**.
8. Figure FS7.  $^1\text{H}$  NMR (300 MHz, 25 °C,  $\text{C}_6\text{D}_6$ ) spectrum of **2a**.
9. Figure FS8.  $^{31}\text{P}\{^1\text{H}\}$  NMR (121.5 MHz, 25 °C,  $\text{C}_6\text{D}_6$ ) spectrum of **2a**.
10. Figure FS9.  $^{13}\text{C}\{^1\text{H}\}$  NMR (75 MHz, 25 °C,  $\text{C}_6\text{D}_6$ ) spectrum of **2a**.
11. Figure FS10.  $^1\text{H}$  NMR (300 MHz, 25 °C,  $\text{C}_6\text{D}_6$ ) spectrum of **2b**.
12. Figure FS11.  $^{31}\text{P}\{^1\text{H}\}$  NMR (121.5 MHz, 25 °C,  $\text{C}_6\text{D}_6$ ) spectrum of **2b**.
13. Figure FS12.  $^{13}\text{C}\{^1\text{H}\}$  NMR (75 MHz, 25 °C,  $\text{C}_6\text{D}_6$ ) spectrum of **2b**.
14. Figure FS13.  $^1\text{H}$  NMR (300 MHz, 25 °C,  $\text{C}_6\text{D}_6$ ) spectrum of **2c**.
15. Figure FS14.  $^{31}\text{P}\{^1\text{H}\}$  NMR (121.5 MHz, 25 °C,  $\text{C}_6\text{D}_6$ ) spectrum of **2c**.
16. Figure FS15.  $^{13}\text{C}\{^1\text{H}\}$  NMR (75 MHz, 25 °C,  $\text{C}_6\text{D}_6$ ) spectrum of **2c**.
17. NMR data for guanidine products **3a-3v**.
18. Figure FS16 - Figure FS53 NMR spectra of the products **3a-3v**.
19. Figures FS54-FS55  $^1\text{H}$  and  $^{31}\text{P}$  NMR (300 MHz, 25 °C,  $\text{C}_6\text{D}_6$ ) spectrum of stoichiometric reaction between complex **2a** and *p*-anisidine (1:2).
20. Figures FS56-FS57  $^1\text{H}$  and  $^{31}\text{P}$  NMR (300 MHz, 25 °C,  $\text{C}_6\text{D}_6$ ) spectrum of stoichiometric reaction between complex **2a** and piperidine (1:2).
21. References

**TS1. Crystallographic data and refinement parameters of 1b and 1c.**

| Crystal parameters                             | <b>1b</b>                                                           | <b>1c</b>                                                           |
|------------------------------------------------|---------------------------------------------------------------------|---------------------------------------------------------------------|
| CCDC NO.                                       | 2124041                                                             | 2124043                                                             |
| Empirical formula                              | C <sub>39</sub> H <sub>47</sub> N <sub>4</sub> P                    | C <sub>29</sub> H <sub>43</sub> N <sub>4</sub> P                    |
| Formula weight                                 | 602.81                                                              | 478.66                                                              |
| <i>T</i> (K)                                   | 249.99(10)                                                          | 293(2)                                                              |
| $\lambda$ (Å)                                  | 0.71073                                                             | 0.71073                                                             |
| Crystal system                                 | Triclinic                                                           | Monoclinic                                                          |
| Space group                                    | <i>P</i> $\bar{1}$                                                  | <i>P</i> 2 <sub>1</sub> / <i>n</i>                                  |
| <i>a</i> (Å)                                   | 9.4611(2)                                                           | 10.4218(5)                                                          |
| <i>b</i> (Å)                                   | 12.4141(3)                                                          | 14.9253(7)                                                          |
| <i>c</i> (Å)                                   | 16.7883(4)                                                          | 20.5378(9)                                                          |
| $\alpha$ (°)                                   | 101.570(2)                                                          | 90                                                                  |
| $\beta$ (°)                                    | 100.081(2)                                                          | 100.693(5)                                                          |
| $\gamma$ (°)                                   | 111.127(2)                                                          | 90                                                                  |
| <i>V</i> (Å <sup>3</sup> )                     | 1734.64(7)                                                          | 3139.2(3)                                                           |
| <i>Z</i>                                       | 2                                                                   | 16                                                                  |
| <i>D</i> <sub>calc</sub> (g cm <sup>-3</sup> ) | 1.158                                                               | 1.072                                                               |
| $\mu$ (mm <sup>-1</sup> )                      | 0.112                                                               | 0.111                                                               |
| <i>F</i> (000)                                 | 652                                                                 | 1104                                                                |
| Theta range for data collection                | 2.617 to 28.908 deg.                                                | 2.9100 to 26.3390 deg.                                              |
| Limiting indices                               | -12 ≤ <i>h</i> ≤ 12,<br>-16 ≤ <i>k</i> ≤ 16,<br>-20 ≤ <i>l</i> ≤ 22 | -13 ≤ <i>h</i> ≤ 13,<br>-18 ≤ <i>k</i> ≤ 20,<br>-22 ≤ <i>l</i> ≤ 27 |
| Reflections collected / unique                 | 27111 / 8000 [R(int) = 0.0378]                                      | 28830 / 7361 [R(int) = 0.0552]                                      |
| Completeness of theta                          | 99.80 %                                                             | 99.64 %                                                             |
| Absorption correction                          | Multi-scan                                                          | Multi-scan                                                          |
| Max. and min. transmission                     | 1.00000 and 0.76682                                                 | 1.00000 and 0.71528                                                 |
| Refinement method                              | Full-matrix least-squares on F <sup>2</sup>                         | Full-matrix least-squares on F <sup>2</sup>                         |
| Data / restraints / parameters                 | 8000 / 0 / 410                                                      | 7361 / 0 / 338                                                      |
| Goodness-of-fit on F <sup>2</sup>              | 1.084                                                               | 1.045                                                               |
| Final R indices [I > 2σ(I)]                    | R1 = 0.0461,                                                        | R1 = 0.0899,                                                        |

|                      |                              |                              |
|----------------------|------------------------------|------------------------------|
|                      | wR2 = 0.1275                 | wR2 = 0.2664                 |
| R indices (all data) | R1 = 0.0571,<br>wR2 = 0.1344 | R1 = 0.1174,<br>wR2 = 0.2856 |

**TS1. (contd). Crystallographic data and refinement parameters of 2a, 2b and 2c.**

| Crystal parameters                             | <b>2a</b>                                                           | <b>2b</b>                                                           | <b>2c</b>                                                           |
|------------------------------------------------|---------------------------------------------------------------------|---------------------------------------------------------------------|---------------------------------------------------------------------|
| CCDC NO.                                       | 2124040                                                             | 2124042                                                             | 2124039                                                             |
| Empirical formula                              | C <sub>47</sub> H <sub>64</sub> N <sub>4</sub> PAI                  | C <sub>41</sub> H <sub>52</sub> N <sub>4</sub> PAI                  | C <sub>31</sub> H <sub>48</sub> N <sub>4</sub> Pal                  |
| Formula weight                                 | 743.01                                                              | 658.85                                                              | 534.71                                                              |
| <i>T</i> (K)                                   | 298                                                                 | 250(10)                                                             | 293(2)                                                              |
| $\lambda$ (Å)                                  | 0.71073                                                             | 0.71073                                                             | 0.71073                                                             |
| Crystal system                                 | Monoclinic                                                          | Triclinic                                                           | Monoclinic                                                          |
| Space group                                    | <i>P</i> 2 <sub>1</sub> / <i>n</i>                                  | <i>P</i> $\bar{1}$                                                  | <i>P</i> 2 <sub>1</sub> / <i>c</i>                                  |
| <i>a</i> (Å)                                   | 13.5229(5)                                                          | 10.2350(2)                                                          | 15.5979(6)                                                          |
| <i>b</i> (Å)                                   | 18.5921(8)                                                          | 19.8700(3)                                                          | 10.9206(4)                                                          |
| <i>c</i> (Å)                                   | 18.0626(8)                                                          | 20.5541(4)                                                          | 18.8109(6)                                                          |
| $\alpha$ (°)                                   | 90                                                                  | 99.080(2)                                                           | 90                                                                  |
| $\beta$ (°)                                    | 100.669(4)                                                          | 91.255(2)                                                           | 100.611(3)                                                          |
| $\gamma$ (°)                                   | 90                                                                  | 100.416(2)                                                          | 90                                                                  |
| <i>V</i> (Å <sup>3</sup> )                     | 4462.8(3)                                                           | 4054.20(13)                                                         | 3149.4(2)                                                           |
| <i>Z</i>                                       | 4                                                                   | 2                                                                   | 4                                                                   |
| <i>D</i> <sub>calc</sub> (g cm <sup>-3</sup> ) | 1.104                                                               | 1.111                                                               | 1.128                                                               |
| $\mu$ (mm <sup>-1</sup> )                      | 0.116                                                               | 0.122                                                               | 0.140                                                               |
| <i>F</i> (000)                                 | 1604                                                                | 1458                                                                | 1160                                                                |
| Theta range for data collection                | 3.0270 to 27.7710 deg.                                              | 2.641 to 29.080                                                     | 3.2390 to 26.8690 deg.                                              |
| Limiting indices                               | -14 ≤ <i>h</i> ≤ 18,<br>-23 ≤ <i>k</i> ≤ 25,<br>-24 ≤ <i>l</i> ≤ 18 | -13 ≤ <i>h</i> ≤ 12,<br>-24 ≤ <i>k</i> ≤ 26,<br>-27 ≤ <i>l</i> ≤ 27 | -20 ≤ <i>h</i> ≤ 19,<br>-14 ≤ <i>k</i> ≤ 14,<br>-24 ≤ <i>l</i> ≤ 21 |
| Reflections collected / unique                 | 39839 / 10308 [R(int) = 0.0744]                                     | 89802 / 19084 [R(int) = 0.0314]                                     | 25063 / 7205 [R(int) = 0.0402]                                      |
| Completeness of theta                          | 99.71 %                                                             | 99.80 %                                                             | 99.13 %                                                             |
| Absorption correction                          | Multi-scan                                                          | Multi-scan                                                          | Multi-scan                                                          |

|                                   |                                             |                                             |                                             |
|-----------------------------------|---------------------------------------------|---------------------------------------------|---------------------------------------------|
| Max. and min. transmission        | 1.00000 and 0.95218                         | 1.00000 and 0.88174                         | 1.00000 and 0.82770                         |
| Refinement method                 | Full-matrix least-squares on F <sup>2</sup> | Full-matrix least-squares on F <sup>2</sup> | Full-matrix least-squares on F <sup>2</sup> |
| Data / restraints / parameters    | 10308 / 24 / 497                            | 19084 / 0 / 898                             | 7205 / 0 / 346                              |
| Goodness-of-fit on F <sup>2</sup> | 1.051                                       | 1.050                                       | 1.055                                       |
| Final R indices [I > 2Sigma(I)]   | R1 = 0.0682, wR2 = 0.1888                   | R1 = 0.0424, wR2 = 0.1150                   | R1 = 0.0432, wR2 = 0.1189                   |
| R indices (all data)              | R1 = 0.0916, wR2 = 0.2038                   | R1 = 0.0579, wR2 = 0.1224                   | R1 = 0.0583, wR2 = 0.1271                   |

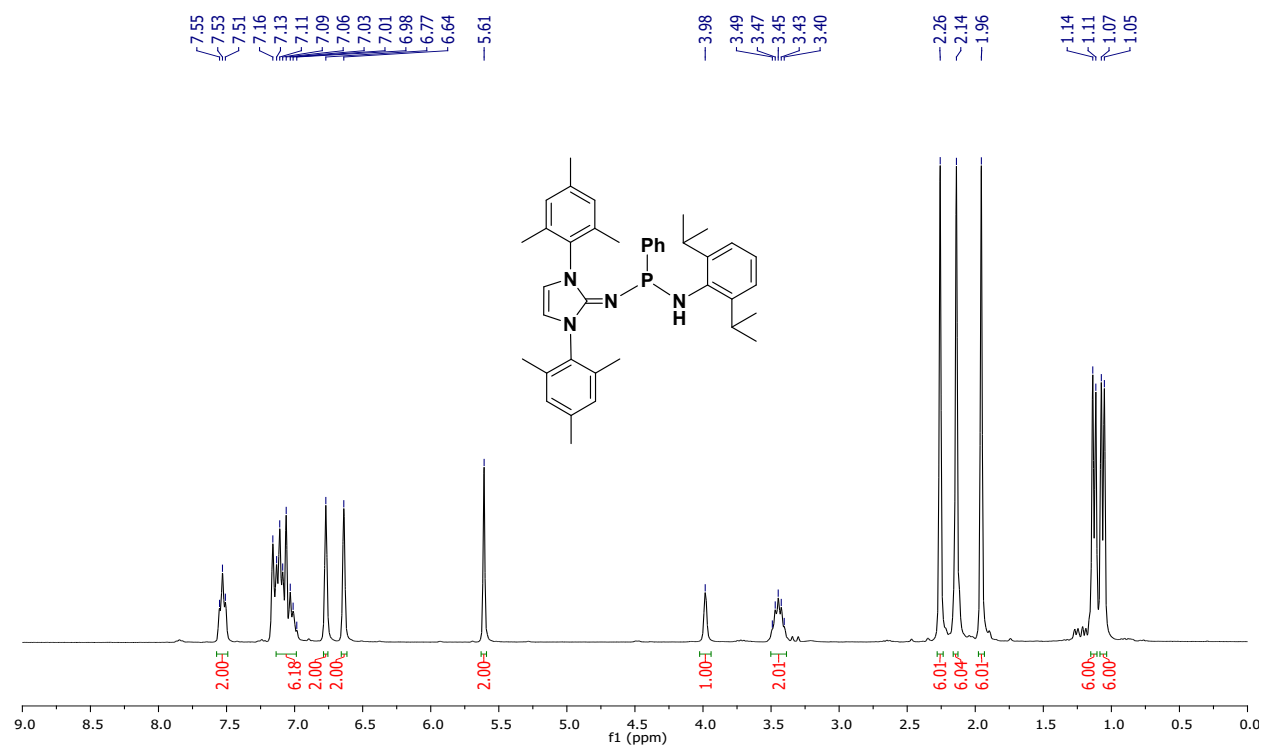

**Figure FS1.** <sup>1</sup>H NMR (300 MHz, 25 °C, C<sub>6</sub>D<sub>6</sub>) spectrum of **1b**.

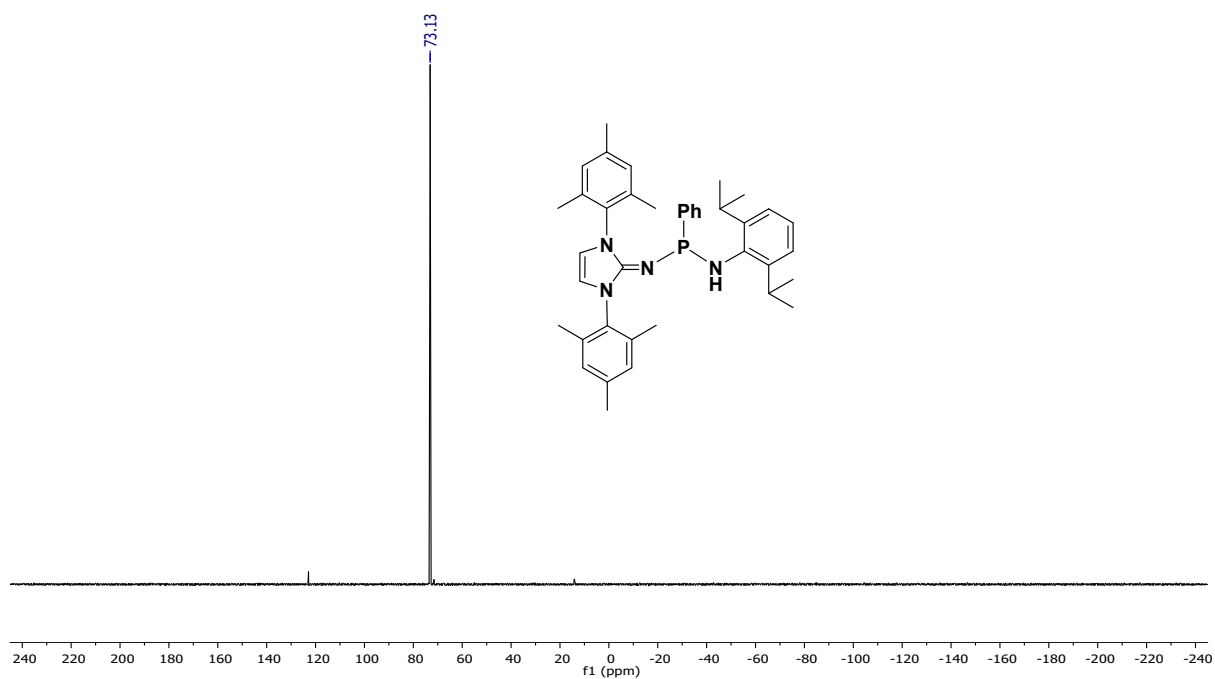

**Figure FS2.**  $^{31}\text{P}\{^1\text{H}\}$  NMR (121.5 MHz, 25 °C  $\text{C}_6\text{D}_6$ ) spectrum of **1b**.

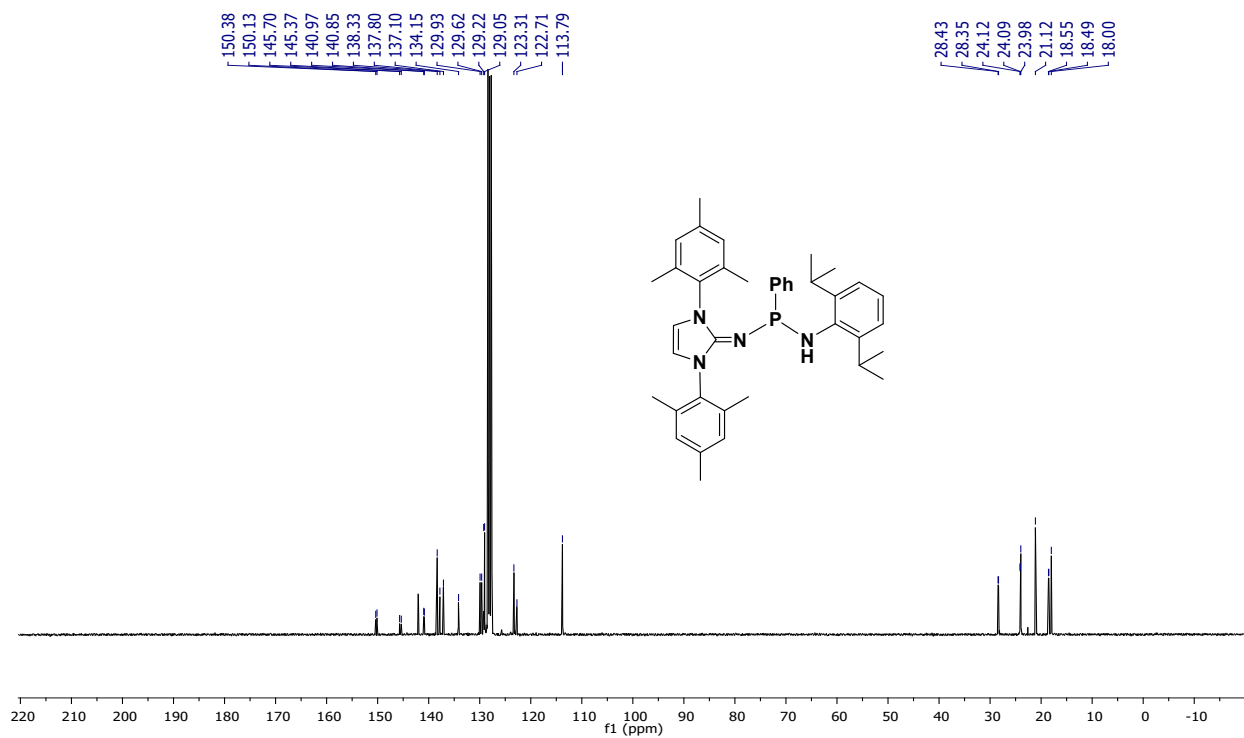

**Figure FS3.**  $^{13}\text{C}\{^1\text{H}\}$  NMR (75 MHz, 25 °C,  $\text{C}_6\text{D}_6$ ) spectrum of **1b**.

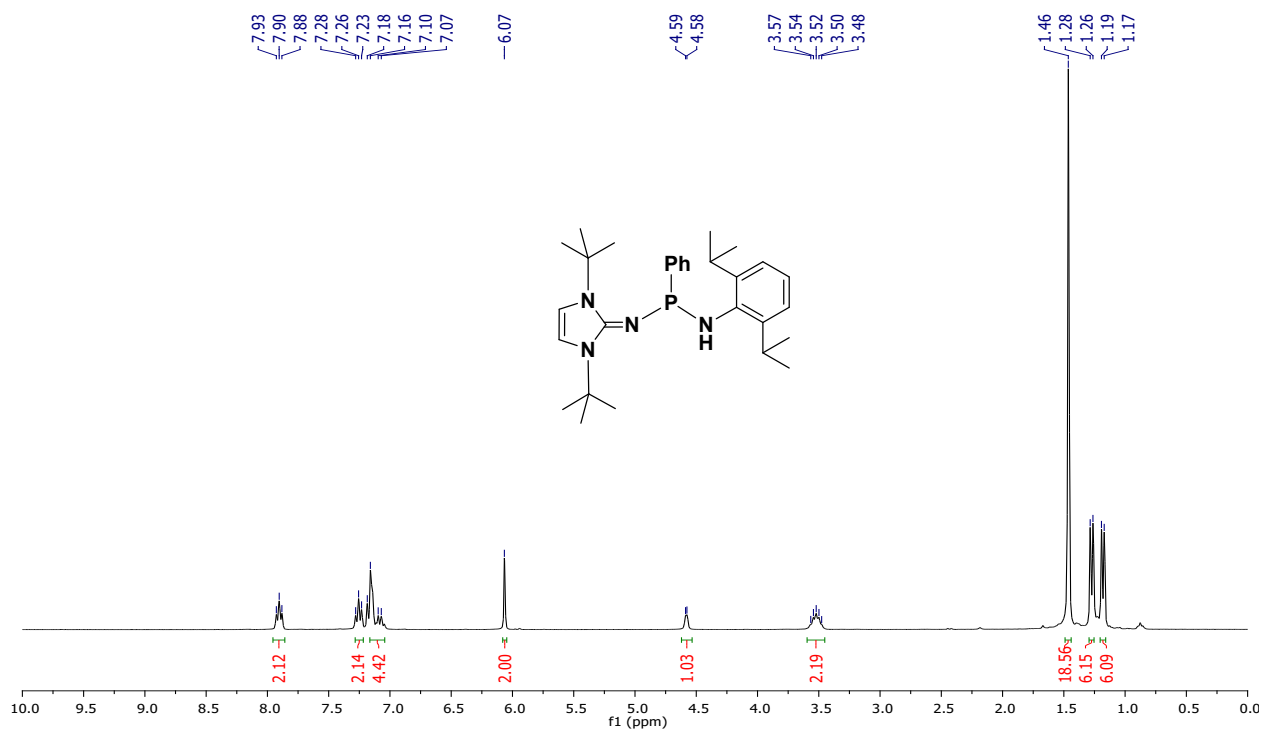

**Figure FS4.**  $^1\text{H}$  NMR (300 MHz, 25 °C,  $\text{C}_6\text{D}_6$ ) spectrum of **1c**.

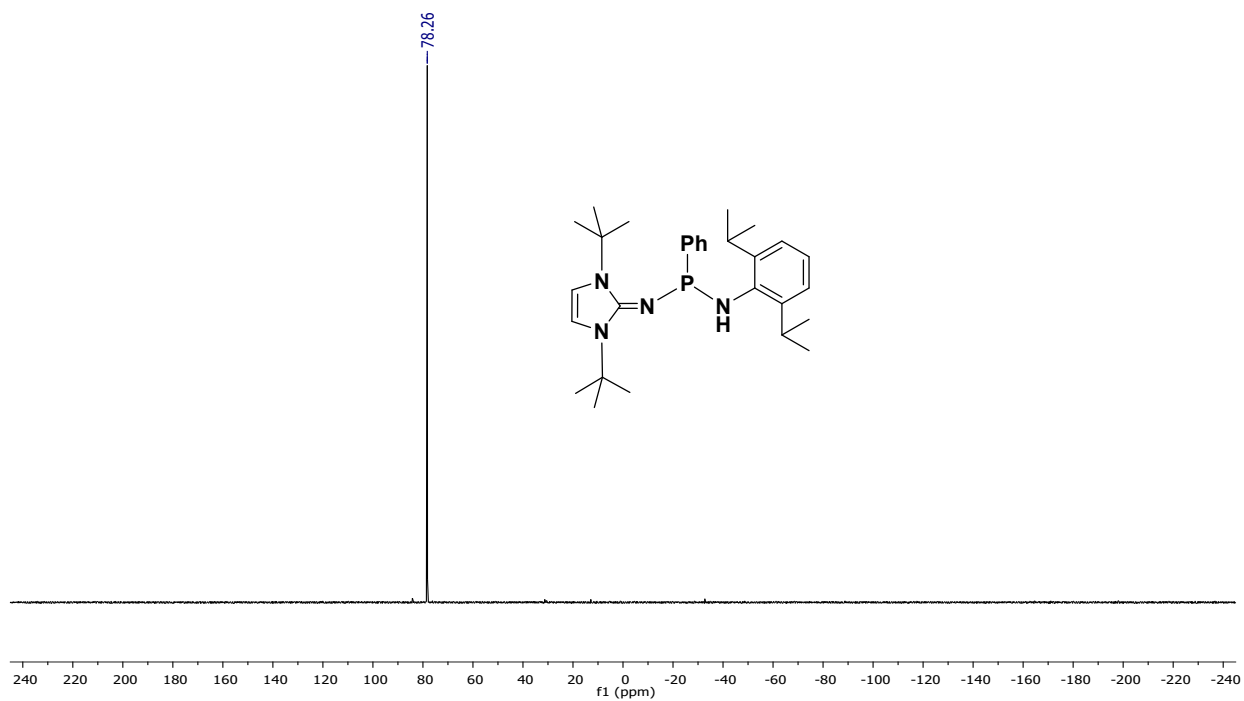

**Figure FS5.**  $^{31}\text{P}\{^1\text{H}\}$  NMR (121.5 MHz, 25 °C,  $\text{C}_6\text{D}_6$ ) spectrum of **1c**.

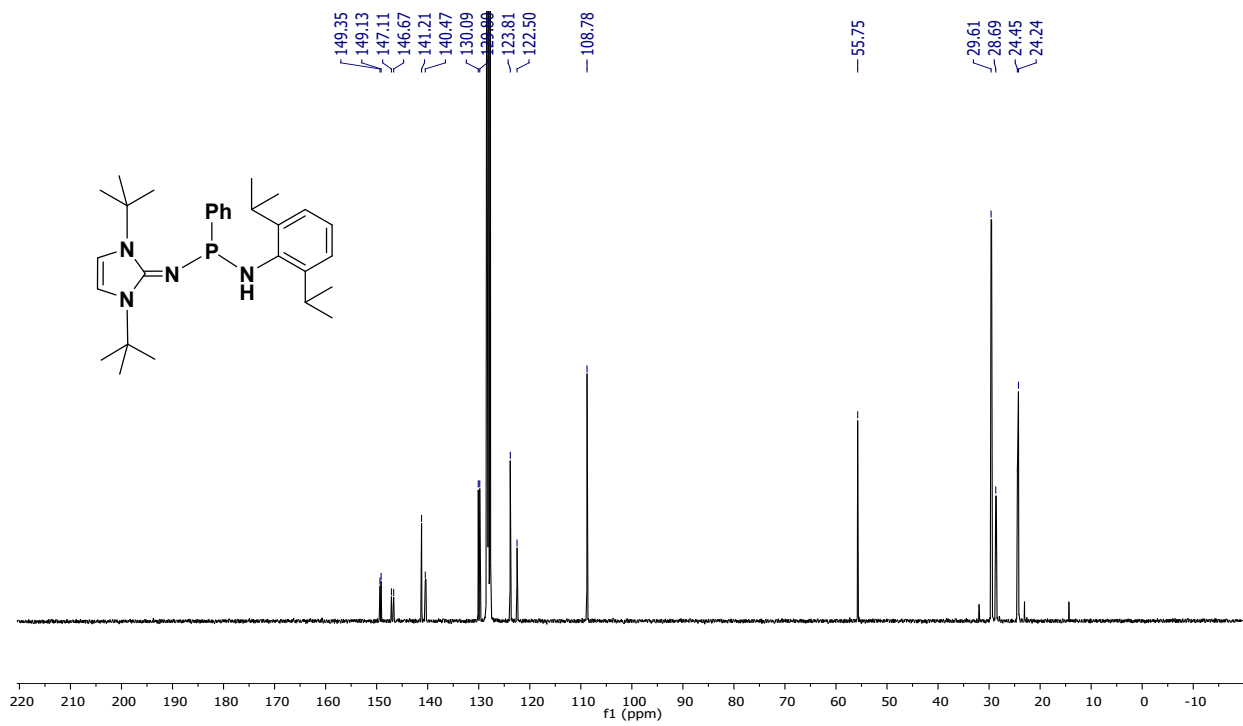

**Figure FS6.**  $^{13}\text{C}\{^1\text{H}\}$  NMR (75 MHz, 25 °C,  $\text{C}_6\text{D}_6$ ) spectrum of **1c**.

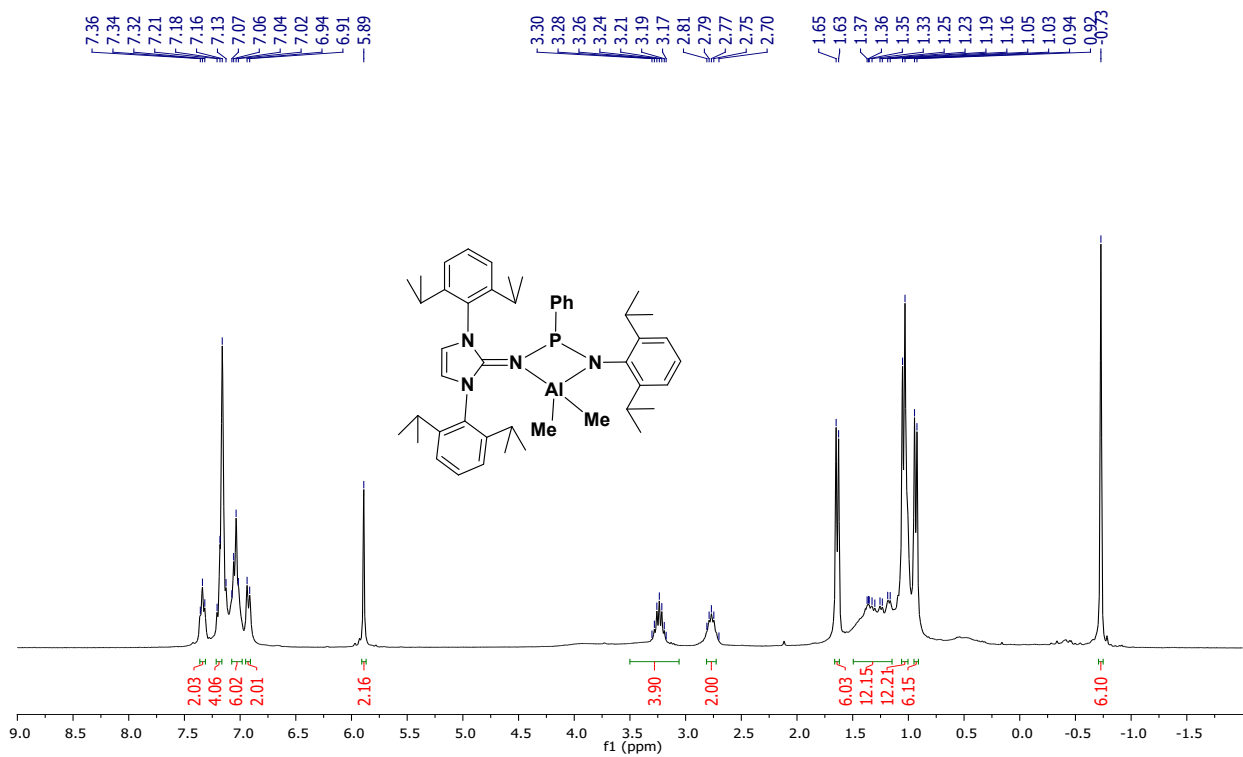

Figure FS7.  $^1\text{H}$  NMR (300 MHz, 25 °C,  $\text{C}_6\text{D}_6$ ) spectrum of **2a**.

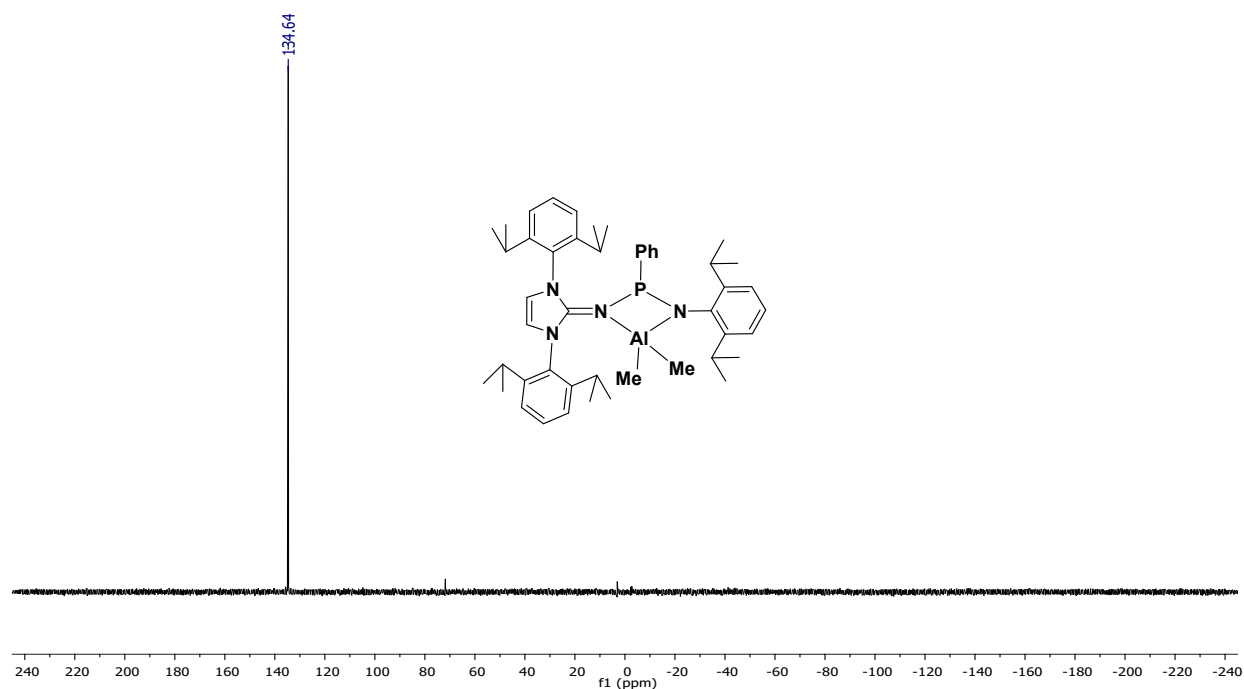

Figure FS8.  $^{31}\text{P}\{^1\text{H}\}$  NMR (121.5 MHz, 25 °C,  $\text{C}_6\text{D}_6$ ) spectrum of **2a**.

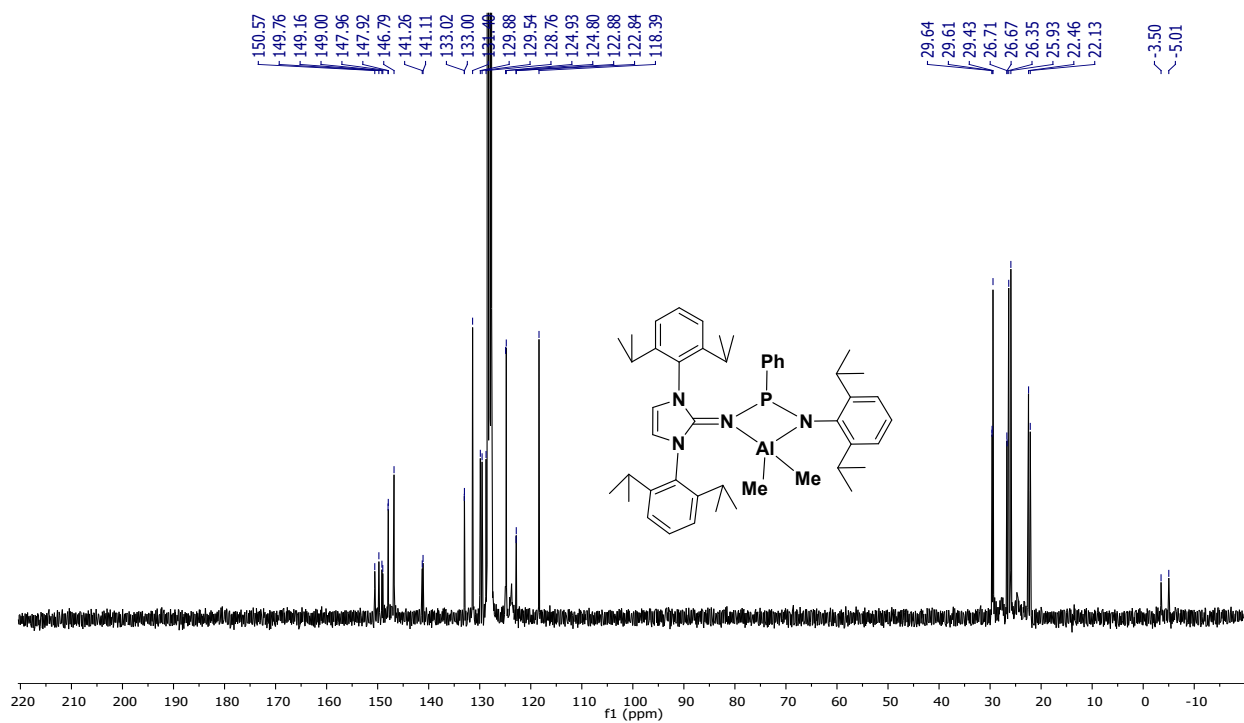



**Figure FS9.**  $^{13}\text{C}\{^1\text{H}\}$  NMR (75 MHz, 25 °C,  $\text{C}_6\text{D}_6$ ) spectrum of **2a**.

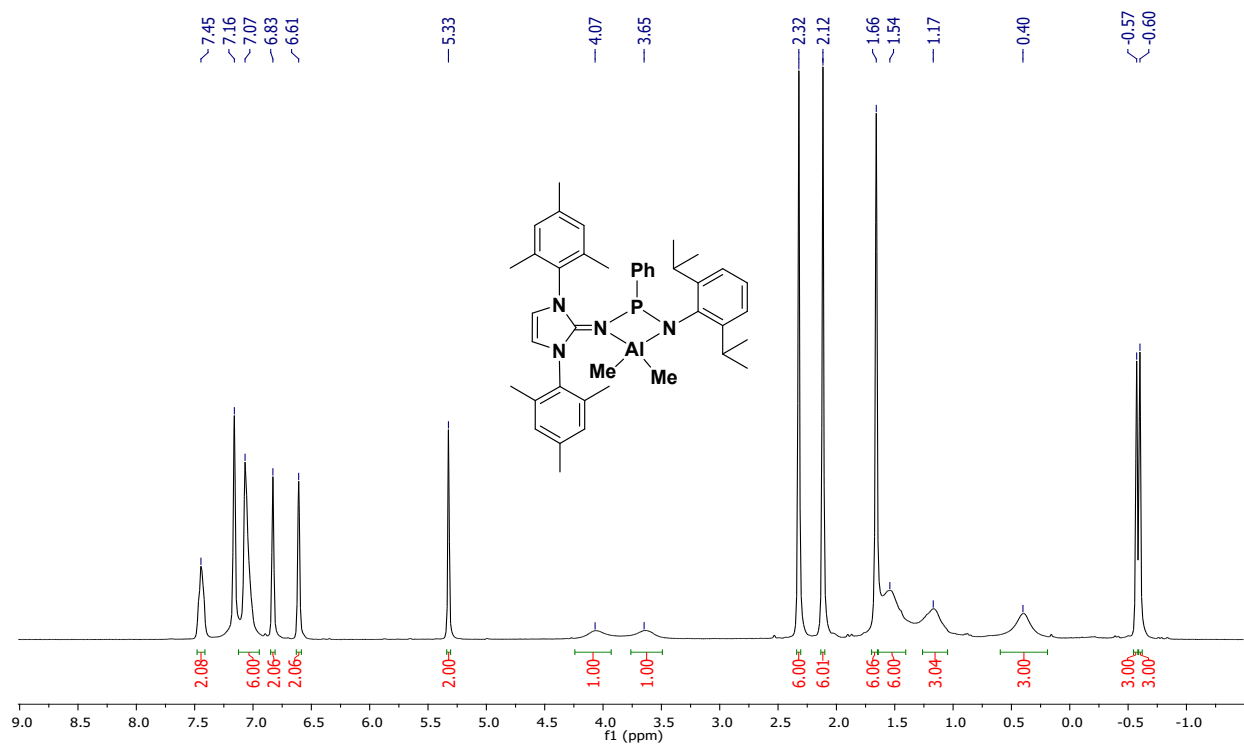

**Figure FS10.**  $^1\text{H}$  NMR (300 MHz, 25 °C,  $\text{C}_6\text{D}_6$ ) spectrum of **2b**.

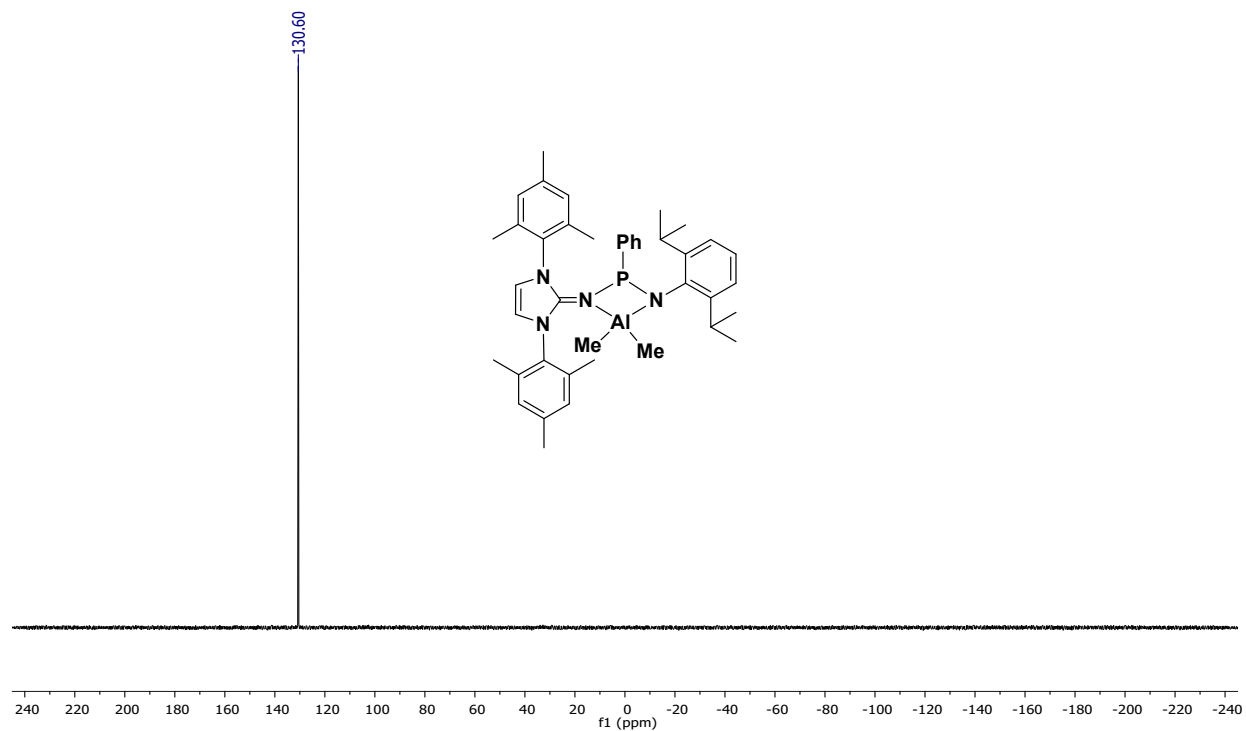

**Figure FS11.**  $^{31}\text{P}\{^1\text{H}\}$  NMR (121.5 MHz, 25 °C,  $\text{C}_6\text{D}_6$ ) spectrum of **2b**.

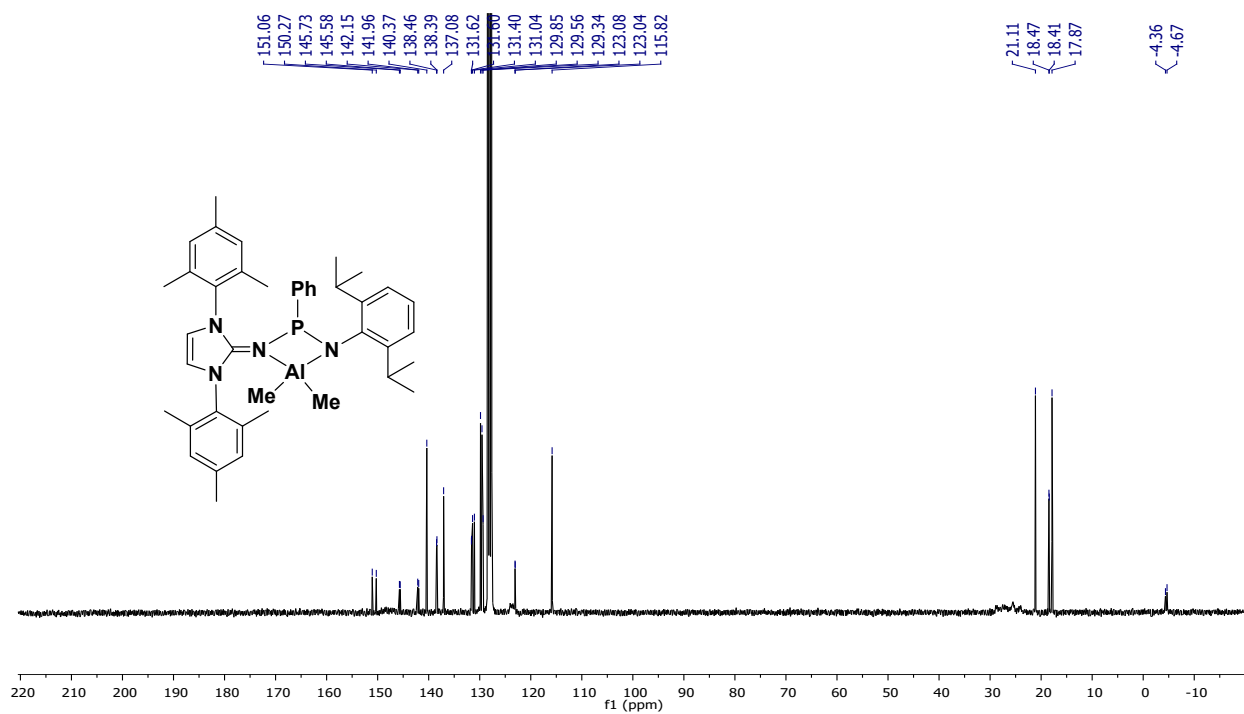

**Figure FS12.**  $^{13}\text{C}\{^1\text{H}\}$  NMR (75 MHz, 25 °C,  $\text{C}_6\text{D}_6$ ) spectrum of **2b**.

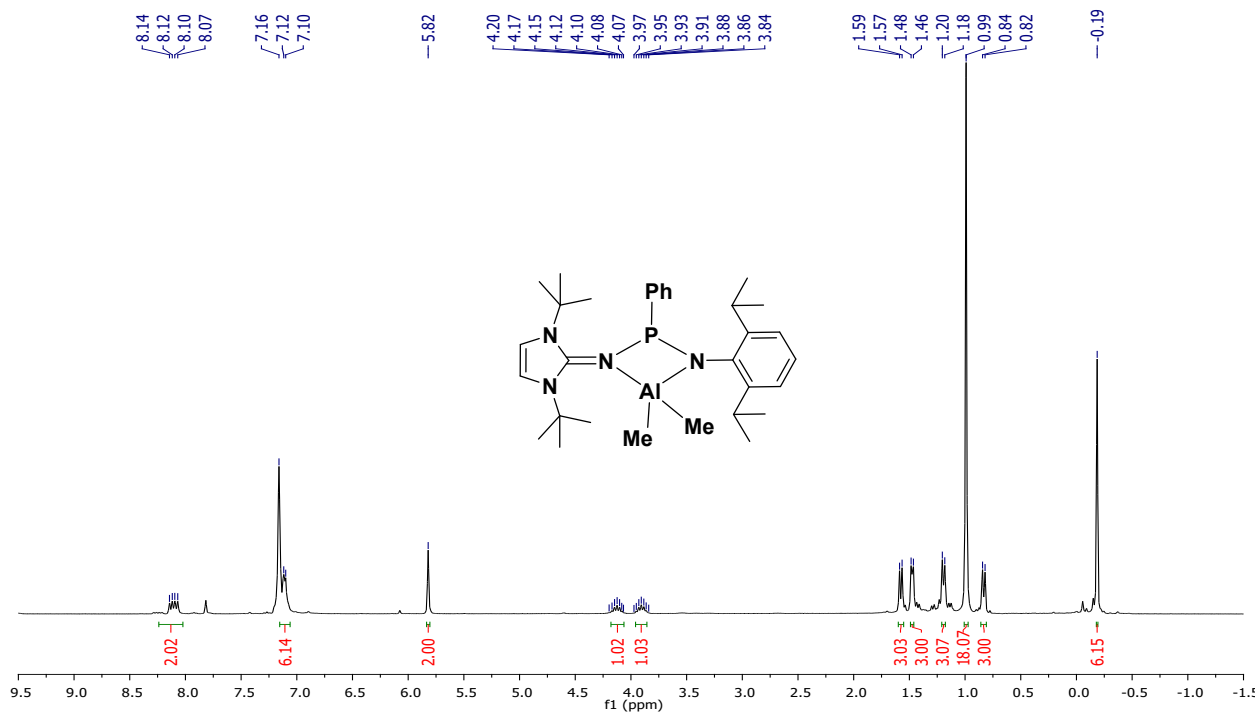

**Figure FS13.** <sup>1</sup>H NMR (300 MHz, 25 °C, C<sub>6</sub>D<sub>6</sub>) spectrum of **2c**.

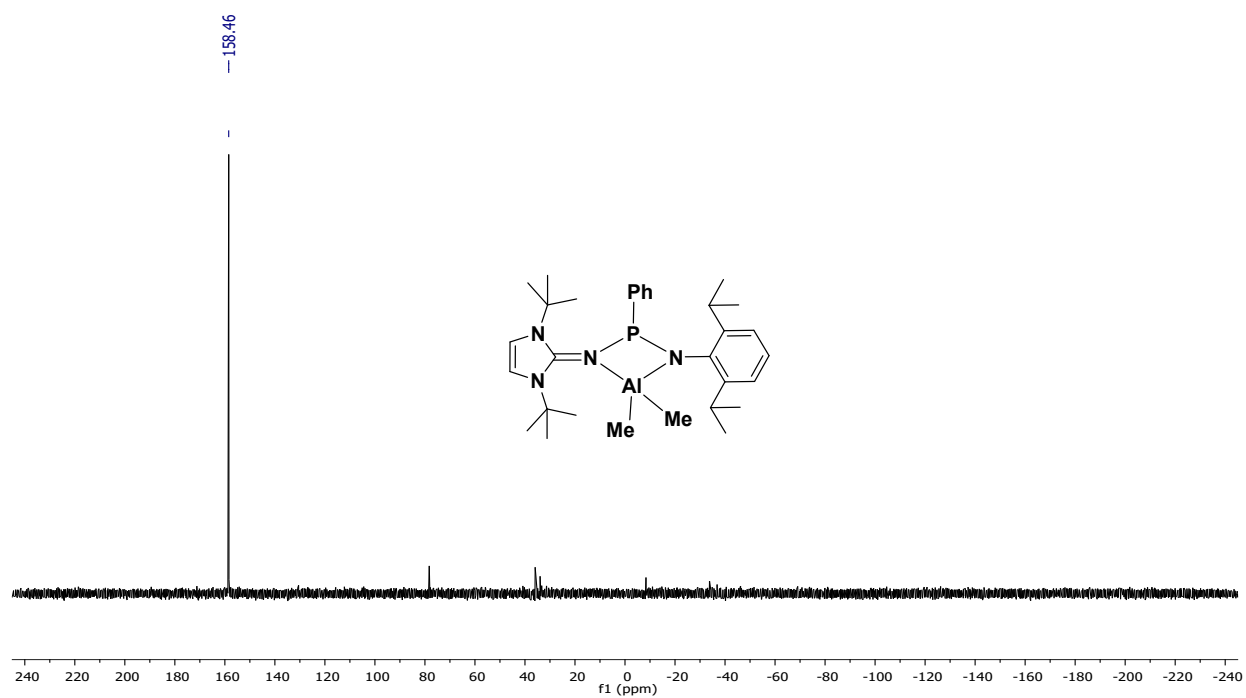

**Figure FS14.** <sup>31</sup>P {<sup>1</sup>H} NMR (121.5 MHz, 25 °C, C<sub>6</sub>D<sub>6</sub>) spectrum of **2c**.

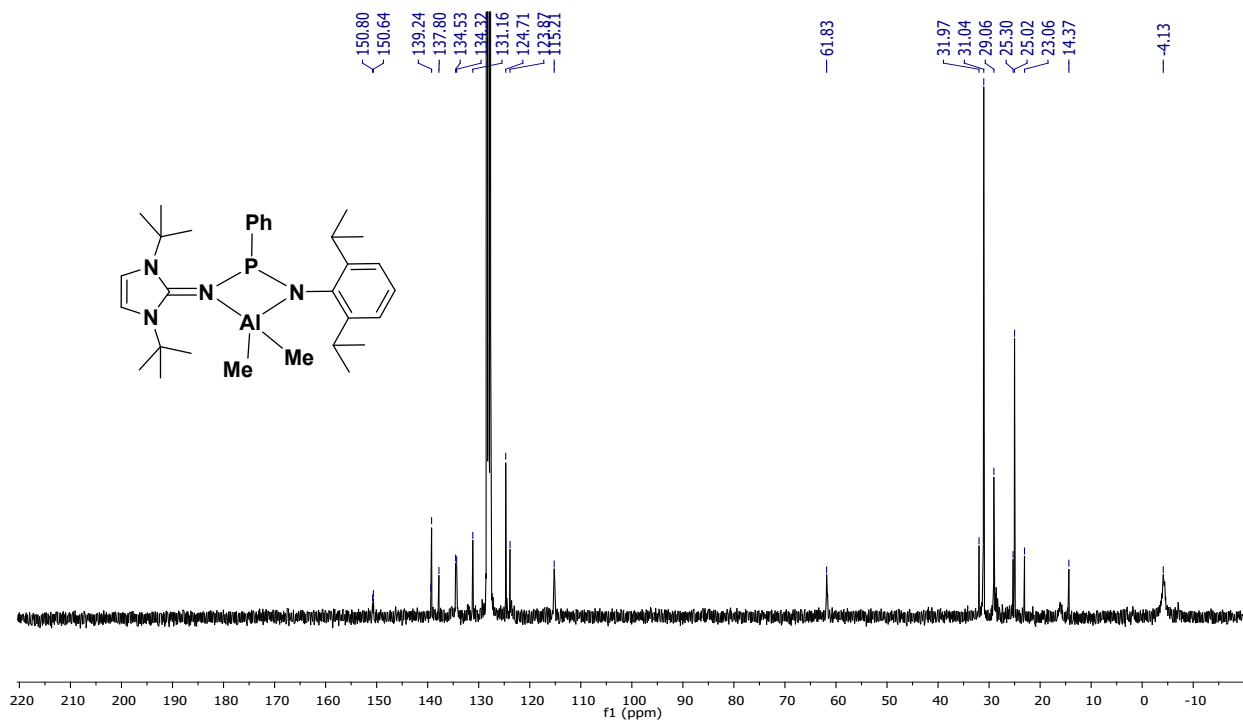

**Figure FS15.**  $^{13}\text{C}\{^1\text{H}\}$  NMR (75 MHz, 25 °C,  $\text{C}_6\text{D}_6$ ) spectrum of **2c**.

### NMR data of guanidine products:

#### *N*-(2-bromophenyl)-*N'*,*N''*-diisopropylguanidine (**3a**)

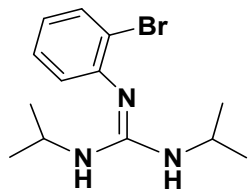

Yield: 88%.  $^1\text{H}$ -NMR (300 MHz, 25 °C,  $\text{CDCl}_3$ ):  $\delta_{\text{H}}$  7.53 (d,  $J = 9.0$  Hz, 1H), 7.20 - 7.15 (m, 1H), 6.89 (d,  $J = 6.0$  Hz, 1H), 6.82 - 6.77 (m, 1H), 3.81 - 3.73 (m, 2H), 3.46 (br, 2H), 1.18 (d,  $J = 6.0$  Hz, 12H) ppm.  $^{13}\text{C}\{^1\text{H}\}$  NMR (75 MHz, 25 °C,  $\text{CDCl}_3$ ):  $\delta_{\text{C}}$  149.78, 148.55, 133.12, 128.28, 125.06, 122.83, 119.49, 43.42, 23.57 ppm. The NMR data are in accordance with the literature.<sup>1</sup>

***N*-(4-chlorophenyl)-*N'*, *N''*-diisopropylguanidine (3b)**

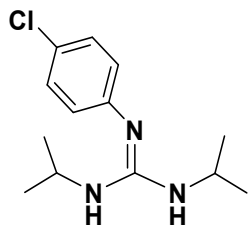

Yield: 84%.  $^1\text{H}$  NMR (300 MHz, 25 °C,  $\text{CDCl}_3$ ):  $\delta_{\text{H}}$  7.19 (d,  $J = 6.0$  Hz, 2H), 6.78 (d,  $J = 9.0$  Hz, 2H), 3.76 - 3.72 (m, 2H), 3.53 (br, 2H), 1.16 (d,  $J = 6.0$  Hz, 12H) ppm.  $^{13}\text{C}\{^1\text{H}\}$  NMR (75 MHz, 25 °C,  $\text{CDCl}_3$ ):  $\delta_{\text{C}}$  150.32, 149.17, 129.32, 126.32, 124.92, 43.33, 23.42 ppm. The NMR data are in accordance with the literature.<sup>2</sup>

***N*-(4-nitrophenyl)-*N'*, *N''*-diisopropylguanidine (3c)**

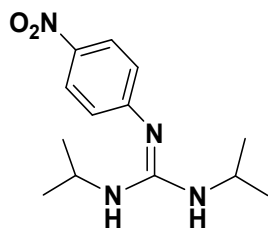

Yield: 78%.  $^1\text{H}$  NMR (300 MHz, 25 °C,  $\text{CDCl}_3$ ):  $\delta_{\text{H}}$  8.09 (d,  $J = 9.0$  Hz, 2H), 6.89 (d,  $J = 9.0$  Hz, 2H), 3.81 (br, 4H), 1.19 (d,  $J = 6.0$  Hz, 12H) ppm.  $^{13}\text{C}\{^1\text{H}\}$  NMR (75 MHz, 25 °C,  $\text{CDCl}_3$ ):  $\delta_{\text{C}}$  158.45, 150.58, 141.06, 125.72, 122.92, 43.56, 23.36 ppm. The NMR data are in accordance with the literature.<sup>2</sup>

***N*-phenyl-*N'*, *N''*-diisopropylguanidine (3d)**

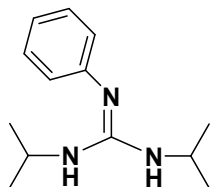

Yield: 83%.  $^1\text{H}$ -NMR (300 MHz, 25 °C,  $\text{CDCl}_3$ ):  $\delta_{\text{H}}$  7.26 - 7.22 (m, 2H), 6.95 - 6.90 (m, 1H), 6.87 - 6.84 (m, 2H), 3.81 - 3.73 (m, 2H), 3.56 (br, 2H), 1.16 (d,  $J = 6.0$  Hz, 12H) ppm.  $^{13}\text{C}\{^1\text{H}\}$  NMR (75 MHz, 25 °C,  $\text{CDCl}_3$ ):  $\delta_{\text{C}}$  150.43, 150.24, 129.36, 123.66, 121.45, 43.32, 23.47 ppm. The NMR data are in accordance with the literature.<sup>2</sup>

***N*-(4-isopropylphenyl)-*N'*, *N''*-diisopropylguanidine (3e)**

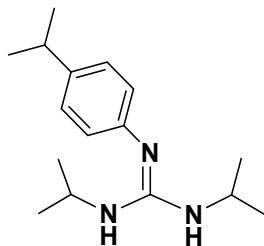

Yield: 82%.  $^1\text{H}$  NMR (300 MHz, 25 °C,  $\text{CDCl}_3$ ):  $\delta_{\text{H}}$  7.09 (d,  $J = 9.0$  Hz, 2H), 6.76 (d,  $J = 6.0$  Hz, 2H), 3.79 - 3.71 (m, 2H), 2.88 - 2.79 (m, 1H), 1.22 (d,  $J = 9.0$  Hz, 6H), 1.14 (d,  $J = 6.0$  Hz, 12H) ppm.  $^{13}\text{C}\{^1\text{H}\}$  NMR (75 MHz, 25 °C,  $\text{CDCl}_3$ ):  $\delta_{\text{C}}$  150.22, 147.72, 141.57, 127.14, 123.13, 43.21, 33.43, 24.21, 23.37 ppm. The NMR data are in accordance with the literature.<sup>2</sup>

***N*-(2,4,6-trimethylphenyl)-*N'*, *N''*-diisopropylguanidine (3f)**

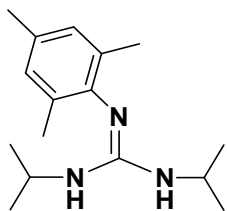

Yield: 75%.  $^1\text{H}$  NMR (300 MHz, 25 °C,  $\text{CDCl}_3$ ):  $\delta_{\text{H}}$  6.79 (s, 2H), 4.09 (bs, 2H), 3.36 (br, 2H), 2.22 (s, 3H), 2.06 (s, 6H), 1.14 (br, 12H) ppm.  $^{13}\text{C}\{^1\text{H}\}$  NMR (75 MHz, 25 °C,  $\text{CDCl}_3$ ):  $\delta_{\text{C}}$  148, 143.62, 130.65, 130.53, 128.62, 43.10, 23.64, 20.80, 18.19 ppm. The NMR data are in accordance with the literature.<sup>3</sup>

***N*-(4-methoxyphenyl)-*N'*, *N''*-diisopropylguanidine (3g)**

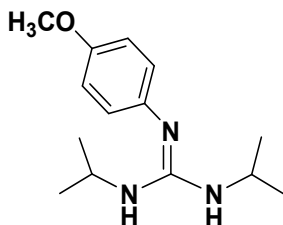

Yield: 88%.  $^1\text{H}$  NMR (300 MHz, 25 °C,  $\text{CDCl}_3$ ):  $\delta_{\text{H}}$  6.82 - 6.74 (m, 4H), 3.76 (s, 3H), 3.52 (br, 2H), 1.14 (d,  $J = 6.0$  Hz, 12H) ppm.  $^{13}\text{C}\{^1\text{H}\}$  NMR (75 MHz, 25 °C,  $\text{CDCl}_3$ ):  $\delta_{\text{C}}$  154.58, 150.72, 143.34, 124.27, 114.66, 55.47, 43.24, 23.43 ppm. The NMR data are in accordance with the literature.<sup>4</sup>

***N*-(2-bromophenyl)-*N'*, *N''*-ditertbutylguanidine (3h)**

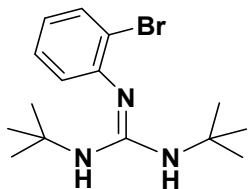

Yield: 83%.  $^1\text{H}$  NMR (300 MHz, 25 °C,  $\text{CDCl}_3$ ):  $\delta_{\text{H}}$  7.54 - 7.52 (m, 1H), 7.20 - 7.14 (m, 1H), 6.83 - 6.74 (m, 2H), 3.62 (br, 2H), 1.36 (s, 18H) ppm.  $^{13}\text{C}\{^1\text{H}\}$  NMR (75 MHz, 25 °C,  $\text{CDCl}_3$ ):  $\delta_{\text{C}}$  149.72, 148.43, 133.17, 128.19, 124.31, 122.50, 119.24, 51.02, 30.27 ppm.

***N*-(4-chlorophenyl)-*N'*, *N''*-ditertbutylguanidine (3i)**

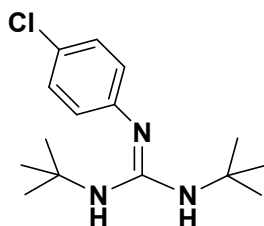

Yield: 85%.  $^1\text{H}$  NMR (300 MHz, 25 °C,  $\text{CDCl}_3$ ):  $\delta_{\text{H}}$  7.21 (d,  $J = 9.0$  Hz, 2H), 6.74 (d,  $J = 9.0$  Hz, 2H), 3.69 (br, 2H), 1.35 (s, 18H) ppm.  $^{13}\text{C}\{^1\text{H}\}$  NMR (75 MHz, 25 °C,  $\text{CDCl}_3$ ):  $\delta_{\text{C}}$  150.34, 149.45, 129.26, 126.09, 124.43, 50.92, 30.18 ppm. The NMR data are in accordance with the literature.<sup>5</sup>

***N*-(4-nitrophenyl)-*N'*, *N''*-ditertbutylguanidine (3j)**

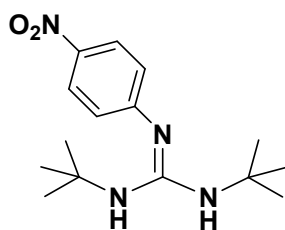

Yield: 75%.  $^1\text{H}$  NMR (300 MHz, 25 °C,  $\text{CDCl}_3$ ):  $\delta_{\text{H}}$  8.06 (d,  $J = 9.0$  Hz, 2H), 6.62 (d,  $J = 9.0$  Hz, 2H), 4.43 (br, 2H), 1.27 (s, 18H) ppm.  $^{13}\text{C}\{^1\text{H}\}$  NMR (75 MHz, 25 °C,  $\text{CDCl}_3$ ):  $\delta_{\text{C}}$  152.69, 126.48, 113.47, 55.05, 31.44 ppm.

### *N*-phenyl-*N'*, *N''*-ditertbutylguanidine (3k)

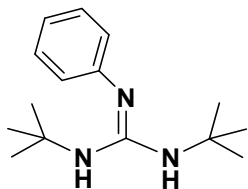

Yield: 81%.  $^1\text{H}$  NMR (300 MHz, 25 °C,  $\text{CDCl}_3$ ):  $\delta_{\text{H}}$  7.16 - 7.11 (m, 2H), 6.82 - 6.77 (m, 1H), 6.70 - 6.67 (m, 2H), 3.57 (br, 2H), 1.23 (s, 18H) ppm.  $^{13}\text{C}\{^1\text{H}\}$  NMR (75 MHz, 25 °C,  $\text{CDCl}_3$ ):  $\delta_{\text{C}}$  150.79, 150.16, 129.31, 123.18, 121.22, 50.87, 50.78, 30.19 ppm. The NMR data are in accordance with the literature.<sup>5</sup>

### *N*-(4-methoxyphenyl)-*N'*, *N''*-ditertbutylguanidine (3l)

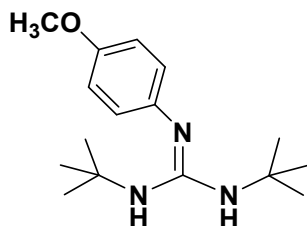

Yield: 83%.  $^1\text{H}$  NMR (300 MHz, 25 °C,  $\text{CDCl}_3$ ):  $\delta_{\text{H}}$  6.81 (d,  $J = 9.0$  Hz, 2H), 6.71 (d,  $J = 9.0$  Hz, 2H), 3.76 (s, 3H), 3.66 (br, 2H), 1.32 (s, 18H) ppm.  $^{13}\text{C}\{^1\text{H}\}$  NMR (75 MHz, 25 °C,  $\text{CDCl}_3$ ):  $\delta_{\text{C}}$  154.47, 150.73, 143.96, 123.79, 114.70, 55.57, 50.80, 30.18 ppm.

### *N*-(4-isopropylphenyl)-*N'*, *N''*-ditertbutylguanidine (3m)

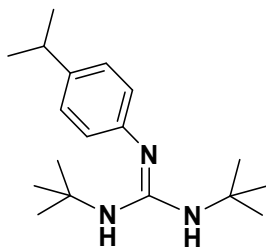

Yield: 81%.  $^1\text{H}$  NMR (300 MHz, 25 °C,  $\text{CDCl}_3$ ):  $\delta_{\text{H}}$  7.11 (d,  $J = 6.0$  Hz, 2H), 6.73 (d,  $J = 6.0$  Hz, 2H), 3.71 (br, 2H), 2.90 - 2.81 (m, 1H), 1.35 (s, 18H), 1.24 (d,  $J = 6.0$  Hz, 6H) ppm.  $^{13}\text{C}\{^1\text{H}\}$  NMR



(75 MHz, 25 °C, CDCl<sub>3</sub>):  $\delta_c$  150.18, 148.23, 141.48, 127.18, 122.77, 115.28, 50.81, 33.54, 30.19, 24.32 ppm.

***N*-(2-bromophenyl)-*N'*,*N''*-dicyclohexylguanidine (3n)**

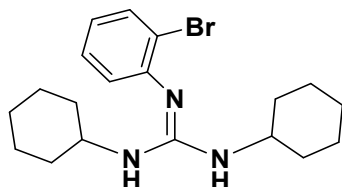

Yield: 85%. <sup>1</sup>H NMR (300 MHz, 25 °C, CDCl<sub>3</sub>):  $\delta_H$  7.53 (d, *J* = 9.0 Hz, 1H), 7.17 (t, *J* = 7.5 Hz, 1H), 6.90 (d, *J* = 6.0 Hz, 1H), 6.79 (t, *J* = 7.5 Hz, 1H), 3.42 (br, 2H), 2.04 (d, *J* = 12 Hz, 4H), 1.71 - 1.57 (m, 6H), 1.41 - 1.29 (m, 4H), 1.20 - 1.05 (m, 6H) ppm. <sup>13</sup>C{<sup>1</sup>H} NMR (75 MHz, 25 °C, CDCl<sub>3</sub>):  $\delta_c$  149.69, 148.69, 133.16, 128.30, 125.20, 122.85, 119.65, 50.31, 34.00, 25.80, 25.03 ppm. The NMR data are in accordance with the literature.<sup>2</sup>

***N*-(4-chlorophenyl)-*N'*,*N''*-dicyclohexylguanidine (3o)**

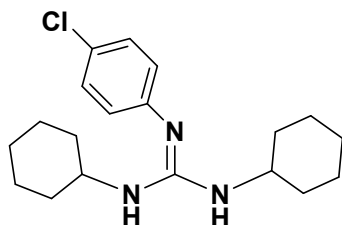

Yield: 86%. <sup>1</sup>H-NMR (300 MHz, 25 °C, CDCl<sub>3</sub>):  $\delta_H$  7.18 (d, *J* = 9.0 Hz, 2H), 6.77 (d, *J* = 9.0 Hz, 2H), 3.38 (br, 2H), 1.98 (d, *J* = 9.0 Hz, 4H), 1.70 - 1.57 (m, 6H), 1.40 - 1.28 (m, 4H), 1.20 - 1.02 (m, 6H) ppm. <sup>13</sup>C{<sup>1</sup>H} NMR (75 MHz, 25 °C, CDCl<sub>3</sub>):  $\delta_c$  150.20, 149.28, 129.31, 126.31, 125.02, 50.21, 33.88, 25.76, 25.00 ppm. The NMR data are in accordance with the literature.<sup>2</sup>

***N*-(4-nitrophenyl)-*N'*, *N''*-dicyclohexylguanidine (3p)**

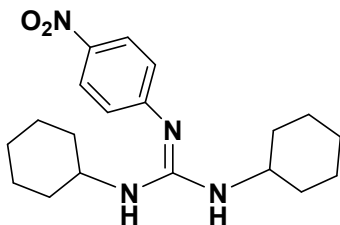

Yield: 77%.  $^1\text{H}$  NMR (300 MHz, 25 °C,  $\text{CDCl}_3$ ):  $\delta_{\text{H}}$  8.08 (d,  $J = 6.0$  Hz, 2H), 6.87 (d,  $J = 6.0$  Hz, 2H), 3.41 (bs, 2H), 1.96 (bs, 4H), 1.83-1.58 (m, 6H), 1.34 - 1.31 (m, 4H), 1.15 (bs, 6H) ppm.  $^{13}\text{C}\{^1\text{H}\}$  NMR (75 MHz, 25 °C,  $\text{CDCl}_3$ ):  $\delta_{\text{C}}$  158.53, 150.46, 140.74, 125.60, 122.76, 50.27, 33.60, 25.53, 24.82 ppm. The NMR data are in accordance with the literature.<sup>2</sup>

***N*-phenyl-*N'*, *N''*-dicyclohexylguanidine (3q)**

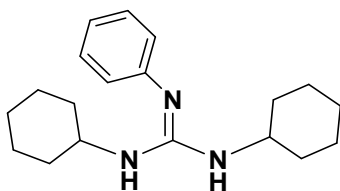

Yield: 83%.  $^1\text{H}$  NMR (300 MHz, 25 °C,  $\text{CDCl}_3$ ):  $\delta_{\text{H}}$  7.23 - 7.21 (m, 2H), 6.93 - 6.88 (m, 1H), 6.86 - 6.84 (m, 2H), 3.62 (br, 2H), 3.41 (br, 2H), 2.00 (d,  $J = 12.0$  Hz, 4H), 1.70 - 1.57 (m, 6H), 1.40 - 1.28 (m, 4H), 1.20 - 1.03 (m, 6H) ppm.  $^{13}\text{C}\{^1\text{H}\}$  NMR (75 MHz, 25 °C,  $\text{CDCl}_3$ ):  $\delta_{\text{C}}$  150.55, 150.10, 129.32, 123.73, 121.39, 50.24, 33.91, 25.80, 25.03 ppm. The NMR data are in accordance with the literature.<sup>5</sup>

***N*-(4-methoxyphenyl)-*N'*, *N''*-dicyclohexylguanidine (3r)**

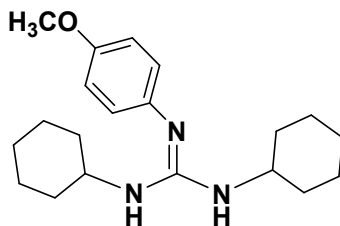

Yield: 87%.  $^1\text{H}$  NMR (300 MHz, 25 °C,  $\text{CDCl}_3$ ):  $\delta_{\text{H}}$  6.81 - 6.74 (m, 4H), 3.75 (s, 3H), 3.38 (bs, 2H), 1.98 (d,  $J = 12.0$  Hz, 4H), 1.68 - 1.56 (m, 6H), 1.39 - 1.27 (m, 4H), 1.19 - 1.00 (m, 6H) ppm.

$^{13}\text{C}\{^1\text{H}\}$  NMR (75 MHz, 25 °C,  $\text{CDCl}_3$ ):  $\delta_{\text{c}}$  154.59, 150.60, 143.54, 124.39, 114.67, 55.52, 50.19, 33.92, 25.79, 25.01 ppm. The NMR data are in accordance with the literature.<sup>5</sup>

***N*-(4-isopropylphenyl)-*N'*, *N''*-dicyclohexylguanidine (3s)**

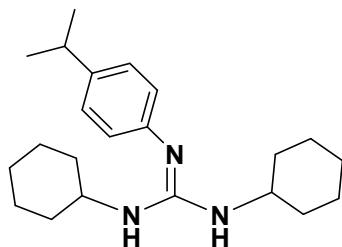

Yield: 84%.  $^1\text{H}$  NMR (300 MHz, 25 °C,  $\text{CDCl}_3$ ):  $\delta_{\text{H}}$  6.96 (d,  $J = 6.0$  Hz, 2H), 6.57 (d,  $J = 9.0$  Hz, 2H), 3.17 (bs, 2H), 2.81 - 2.69 (m, 1H), 1.89 (d,  $J = 9.0$  Hz, 4H), 1.71 (d,  $J = 3.0$  Hz, 4H), 1.54 (d,  $J = 9.0$  Hz, 2H), 1.36 - 1.27 (m, 10H), 1.17 (d,  $J = 6.0$  Hz, 6H) ppm.  $^{13}\text{C}\{^1\text{H}\}$  NMR (75 MHz, 25 °C,  $\text{CDCl}_3$ ):  $\delta_{\text{c}}$  144.10, 139.44, 138.46, 126.76, 114.86, 55.43, 34.71, 33.01, 25.25, 24.44, 24.01 ppm. The NMR data are in accordance with the literature.<sup>2</sup>

***N*-(2,4,6-trimethylphenyl)-*N'*, *N''*-dicyclohexylguanidine (3t)**

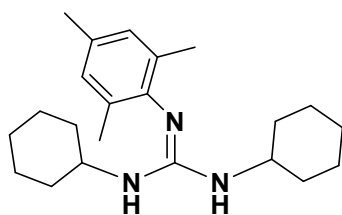

Yield: 76%.  $^1\text{H}$  NMR (300 MHz, 25 °C,  $\text{CDCl}_3$ ):  $\delta_{\text{H}}$  6.77 (s, 2H), 3.20 (br, 2H), 2.21 (s, 3H), 2.16 (s, 6H), 1.94 - 1.91 (m, 4H), 1.76 (br, 4H), 1.59 - 1.56 (m, 2H), 1.39 - 1.24 (m, 10H) ppm.  $^{13}\text{C}\{^1\text{H}\}$  NMR (75 MHz, 25 °C,  $\text{CDCl}_3$ ):  $\delta_{\text{c}}$  140.10, 139.91, 128.88, 127.20, 121.89, 55.82, 35.00, 25.53, 24.77, 20.42, 17.61 ppm. The NMR data are in accordance with the literature.<sup>3</sup>

***N,N'*-diisopropylpyrrolidine-1-carboximidamide (3u)**

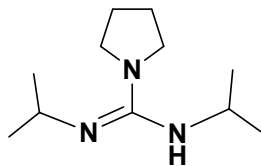

Yield: 84%.  $^1\text{H}$  NMR (300 MHz, 25 °C,  $\text{CDCl}_3$ ):  $\delta_{\text{H}}$  3.34 - 3.30 (m, 2H), 3.19 (br, 4H), 1.72 (br, 4H), 1.04 (d,  $J = 6.0$  Hz, 12H) ppm.  $^{13}\text{C}\{^1\text{H}\}$  NMR (75 MHz, 25 °C,  $\text{CDCl}_3$ ):  $\delta_{\text{C}}$  153.26, 47.62, 46.35, 24.93, 24.48 ppm. The NMR data are in accordance with the literature.<sup>2</sup>

***N,N'*-dicyclohexylpyrrolidine-1-carboximidamide (3v)**

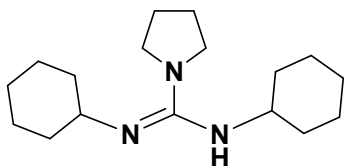

Yield: 81%.  $^1\text{H}$  NMR (300 MHz, 25 °C,  $\text{CDCl}_3$ ):  $\delta_{\text{H}}$  3.22 (br, 4H), 2.93 (br, 2H), 1.76 - 1.70 (m, 12H), 1.59 - 1.55 (m, 2H), 1.31-1.02 (m, 10H) ppm.  $^{13}\text{C}\{^1\text{H}\}$  NMR (75 MHz, 25 °C,  $\text{CDCl}_3$ ):  $\delta_{\text{C}}$  153.55, 55.21, 47.99, 35.29, 25.83, 25.62, 25.25 ppm. The NMR data are in accordance with the literature.<sup>2</sup>

**$^1\text{H}$  NMR and  $^{13}\text{C}\{^1\text{H}\}$  NMR spectra of guanidine product:**

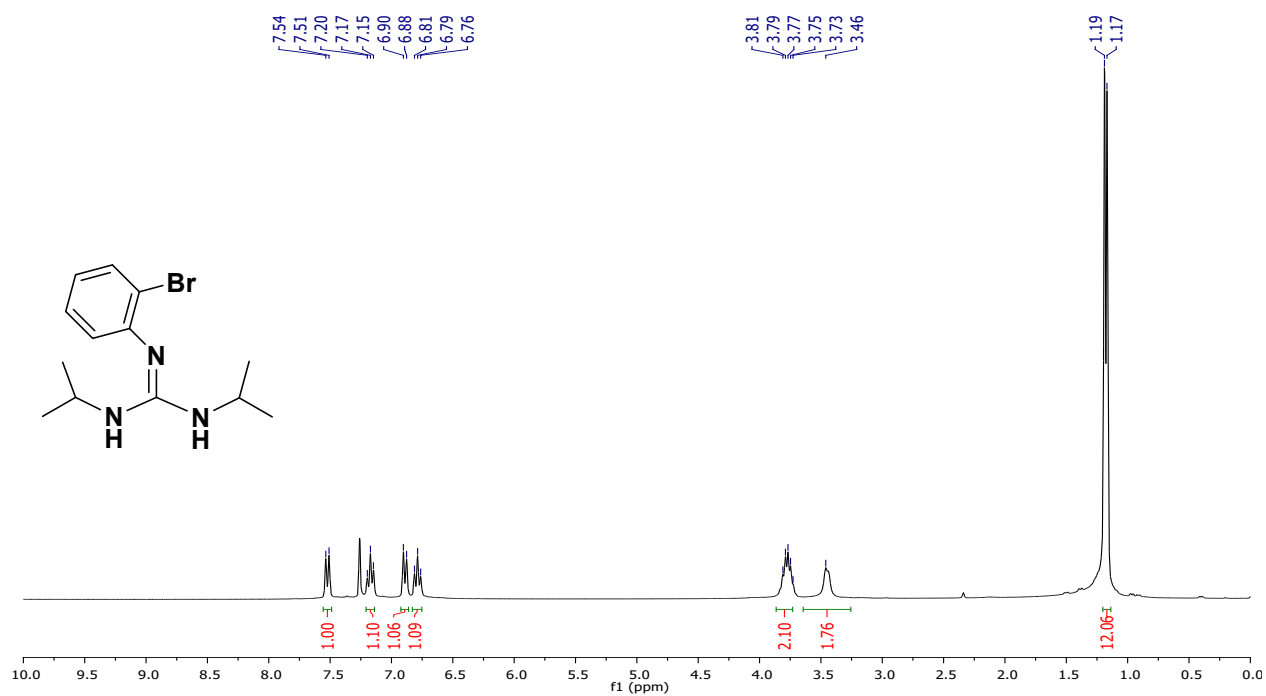

**Figure FS16.**  $^1\text{H}$  NMR (300 MHz, 25 °C,  $\text{CDCl}_3$ ) spectrum of 3a.

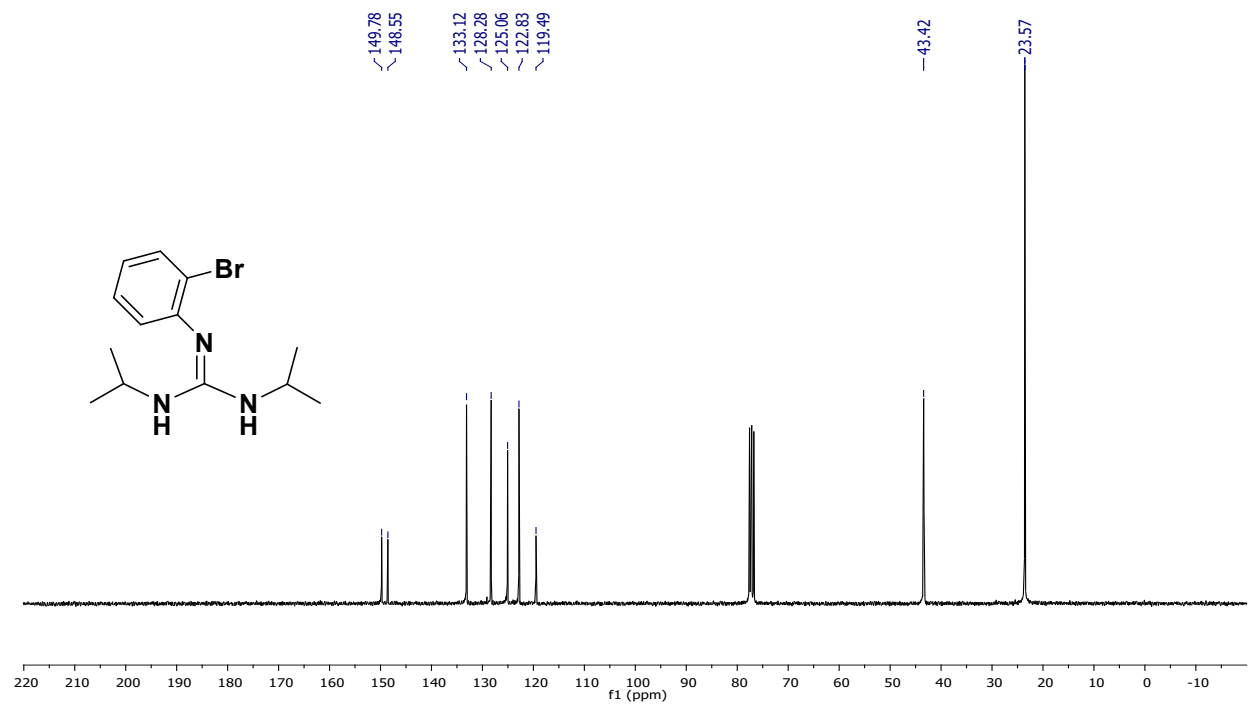

**Figure FS17.**  $^{13}\text{C}\{^1\text{H}\}$  NMR (75 MHz, 25 °C,  $\text{CDCl}_3$ ) spectrum of 3a.

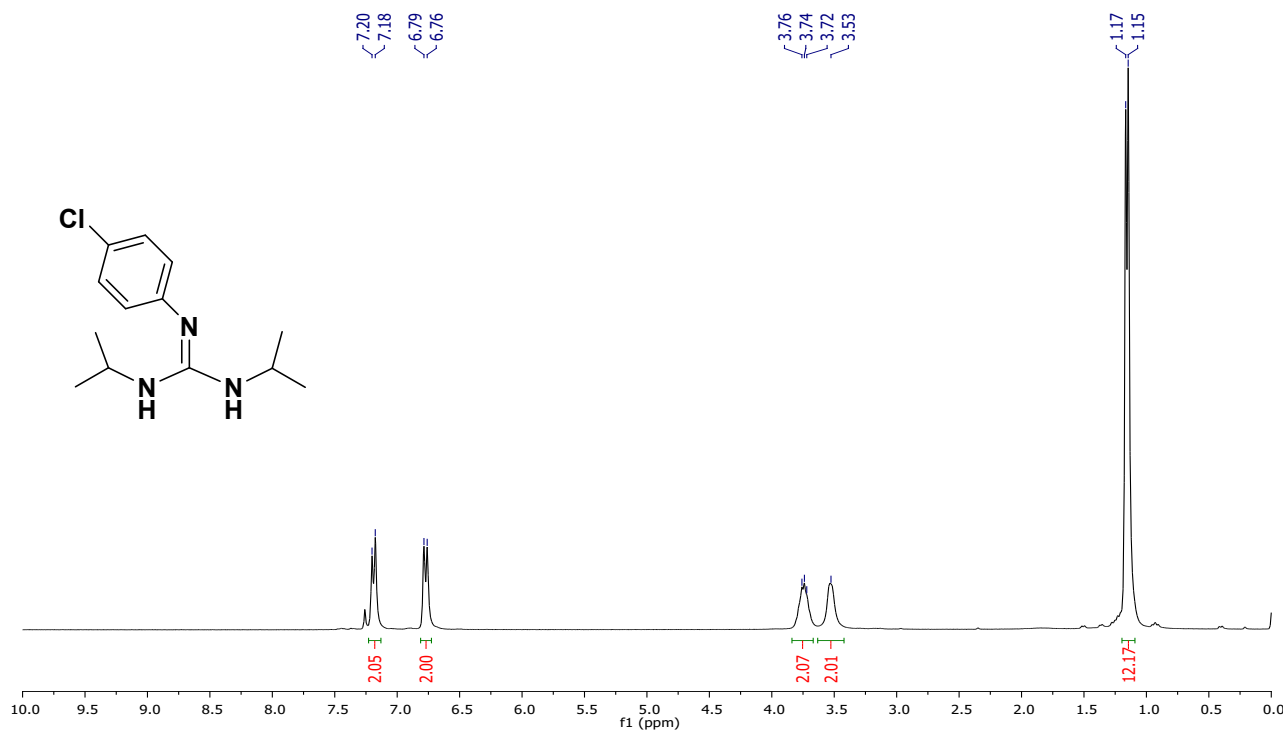

**Figure FS18.**  $^1\text{H}$  NMR (300 MHz, 25 °C,  $\text{CDCl}_3$ ) spectrum of **3b**.

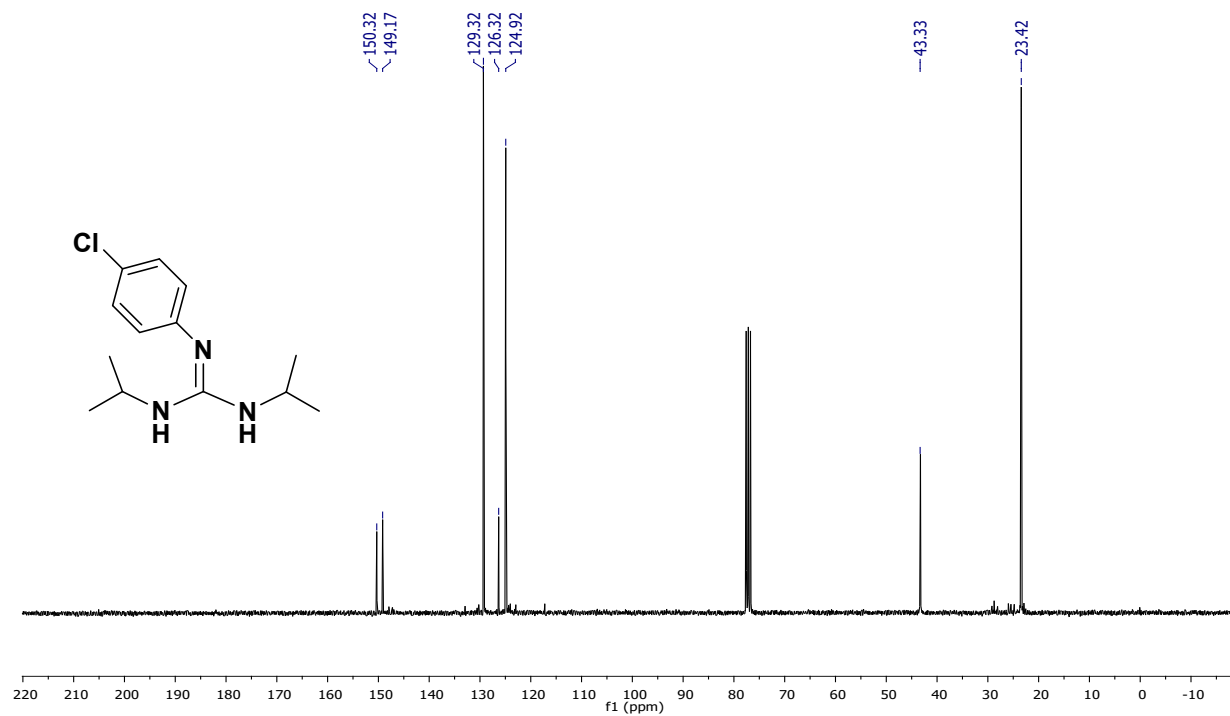

**Figure FS19.**  $^{13}\text{C}\{^1\text{H}\}$  NMR (75 MHz, 25 °C,  $\text{CDCl}_3$ ) spectrum of **3b**.

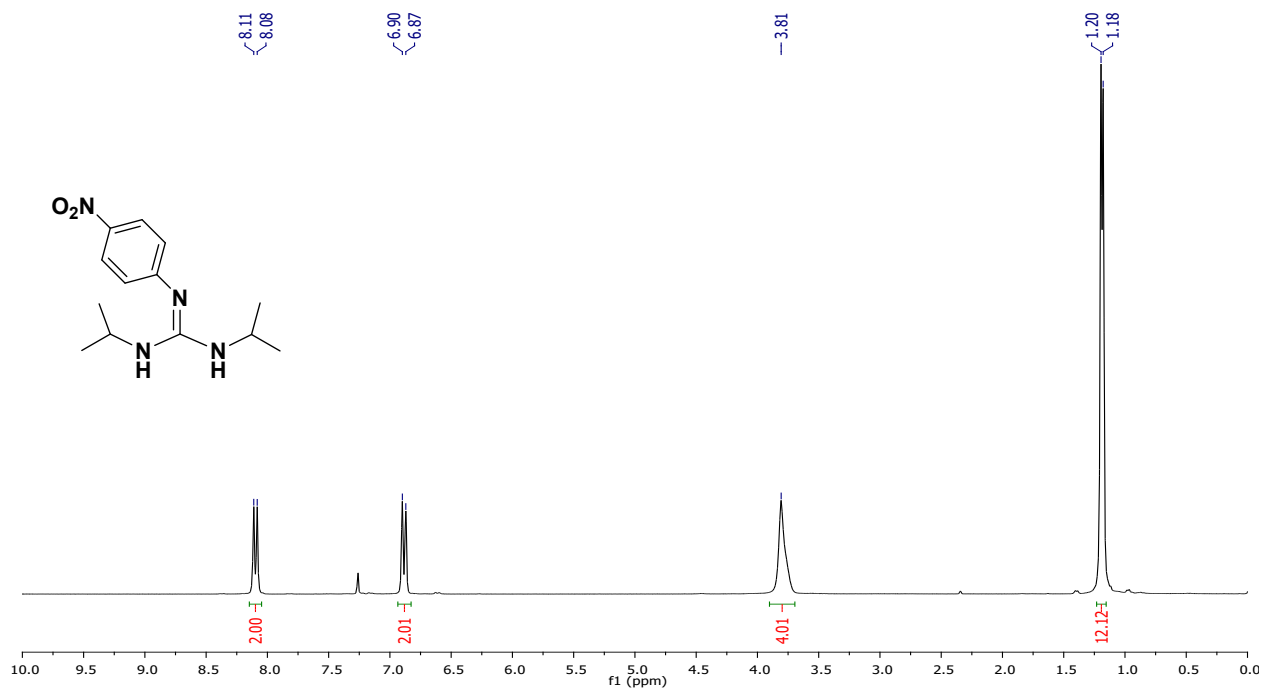

**Figure FS20.** <sup>1</sup>H NMR (300 MHz, 25 °C, CDCl<sub>3</sub>) spectrum of **3c**.

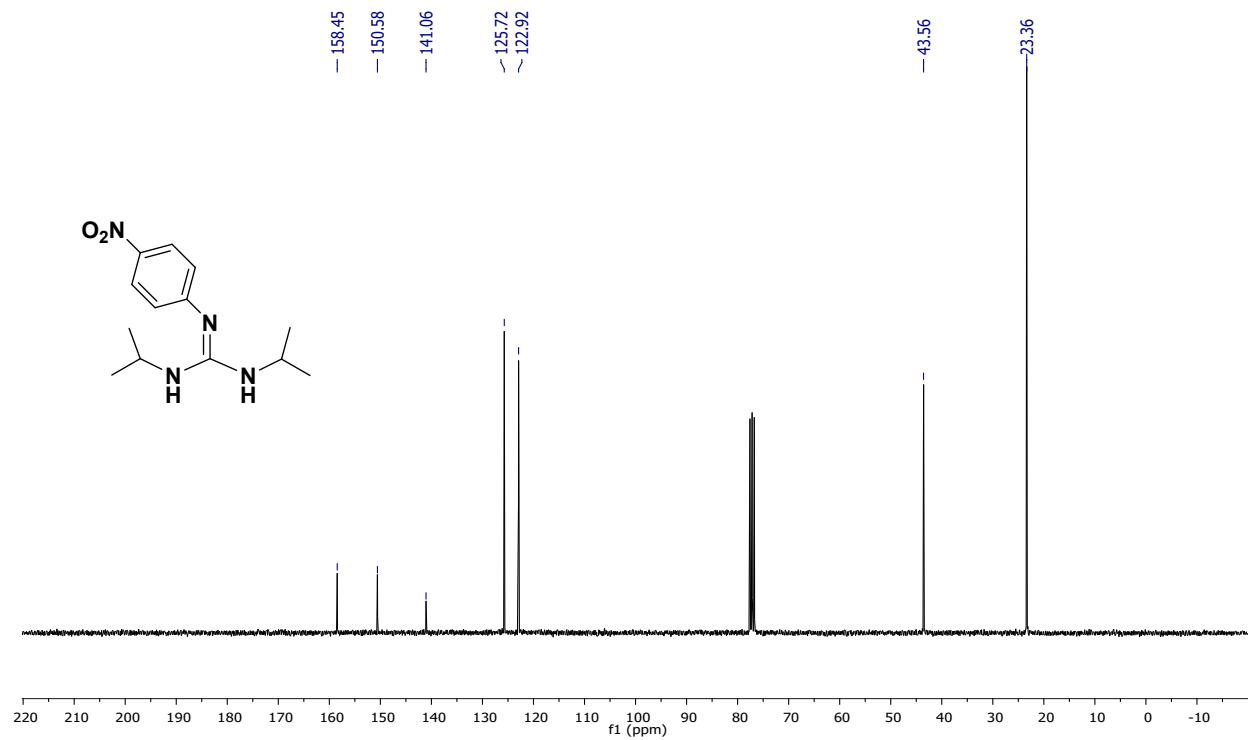

**Figure FS15.** <sup>13</sup>C {<sup>1</sup>H} NMR (75 MHz, 25 °C, CDCl<sub>3</sub>) spectrum of **3c**.

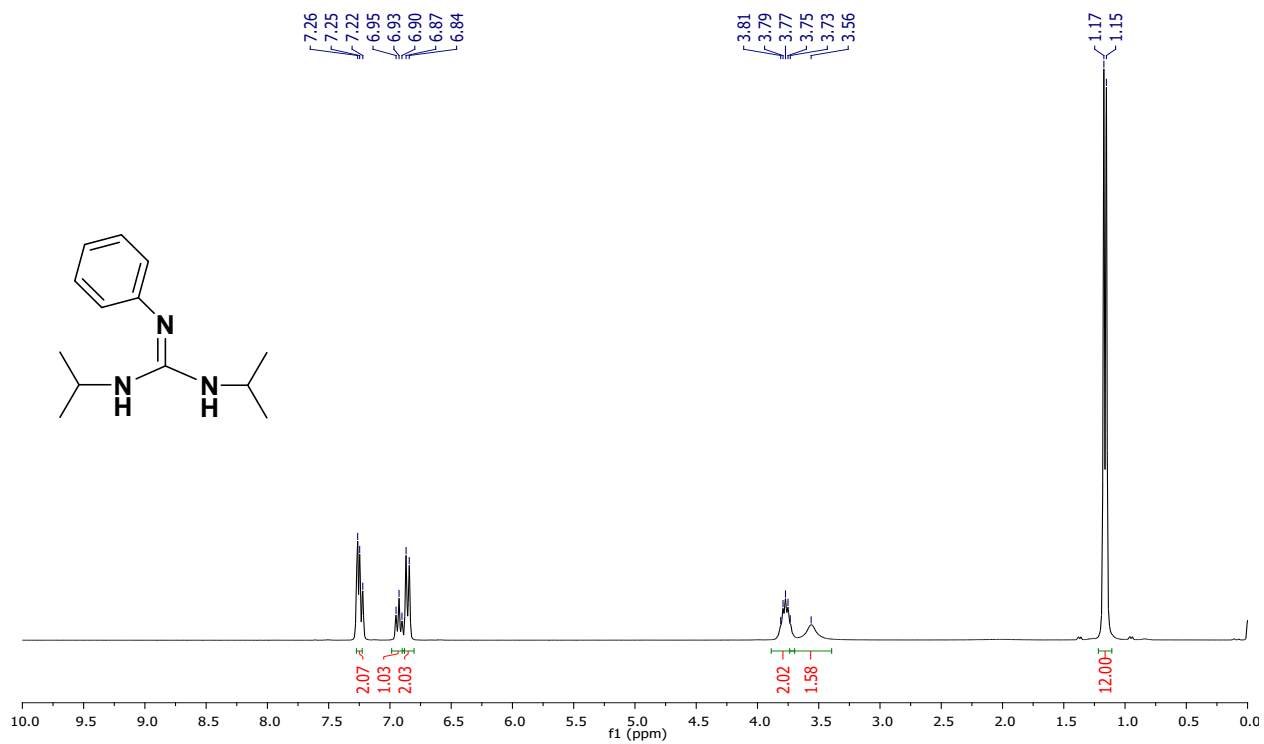

Figure FS16. <sup>1</sup>H NMR (300 MHz, 25 °C, CDCl<sub>3</sub>) spectrum of 3d.

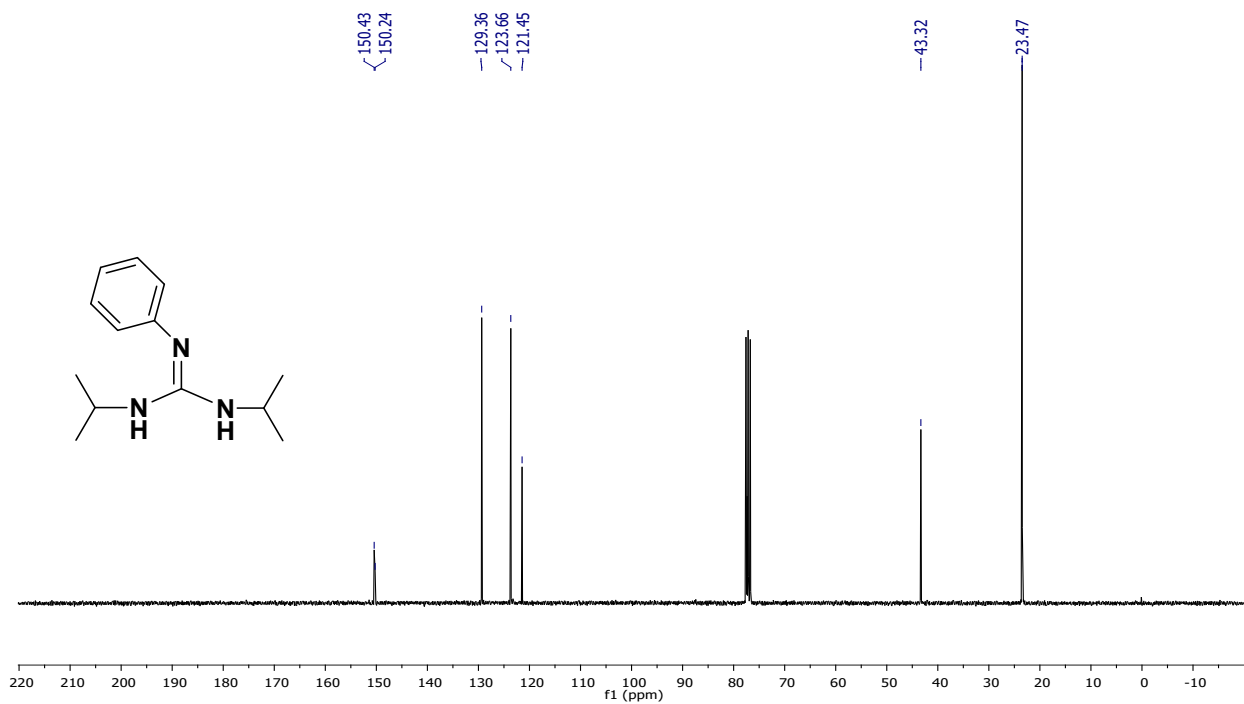

Figure FS17. <sup>13</sup>C {<sup>1</sup>H} NMR (75 MHz, 25 °C, CDCl<sub>3</sub>) spectrum of 3d.



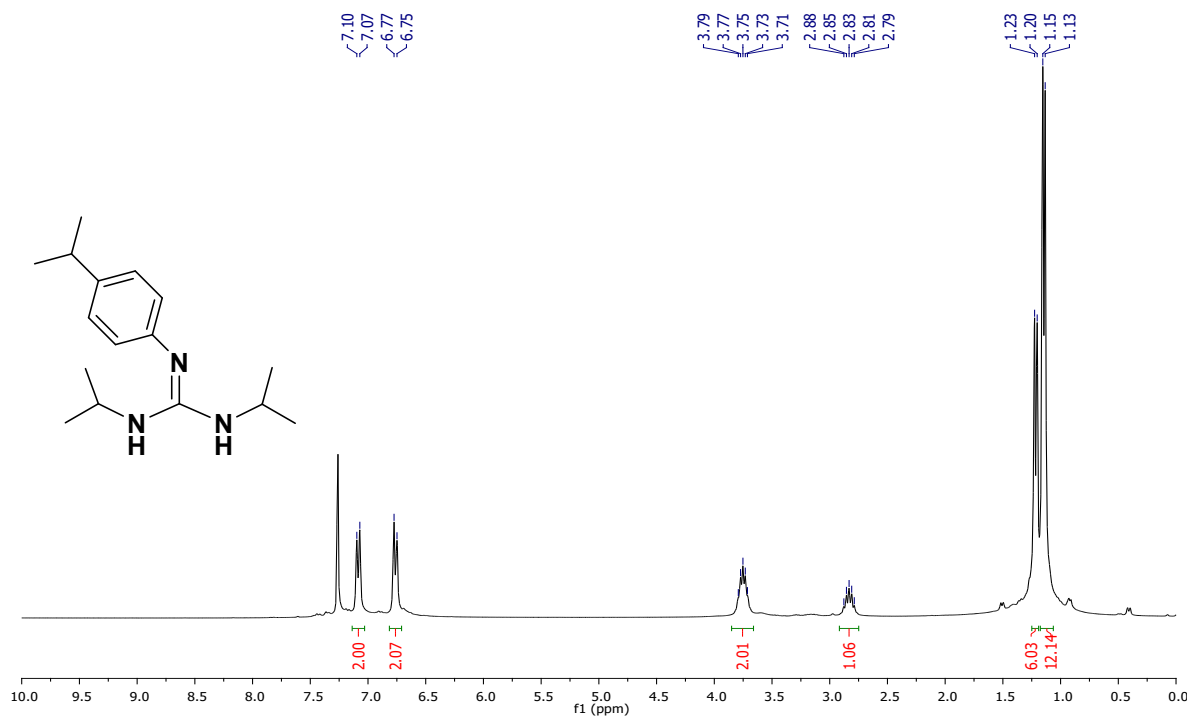

Figure FS18.  $^1\text{H}$  NMR (300 MHz, 25 °C,  $\text{CDCl}_3$ ) spectrum of 3e.

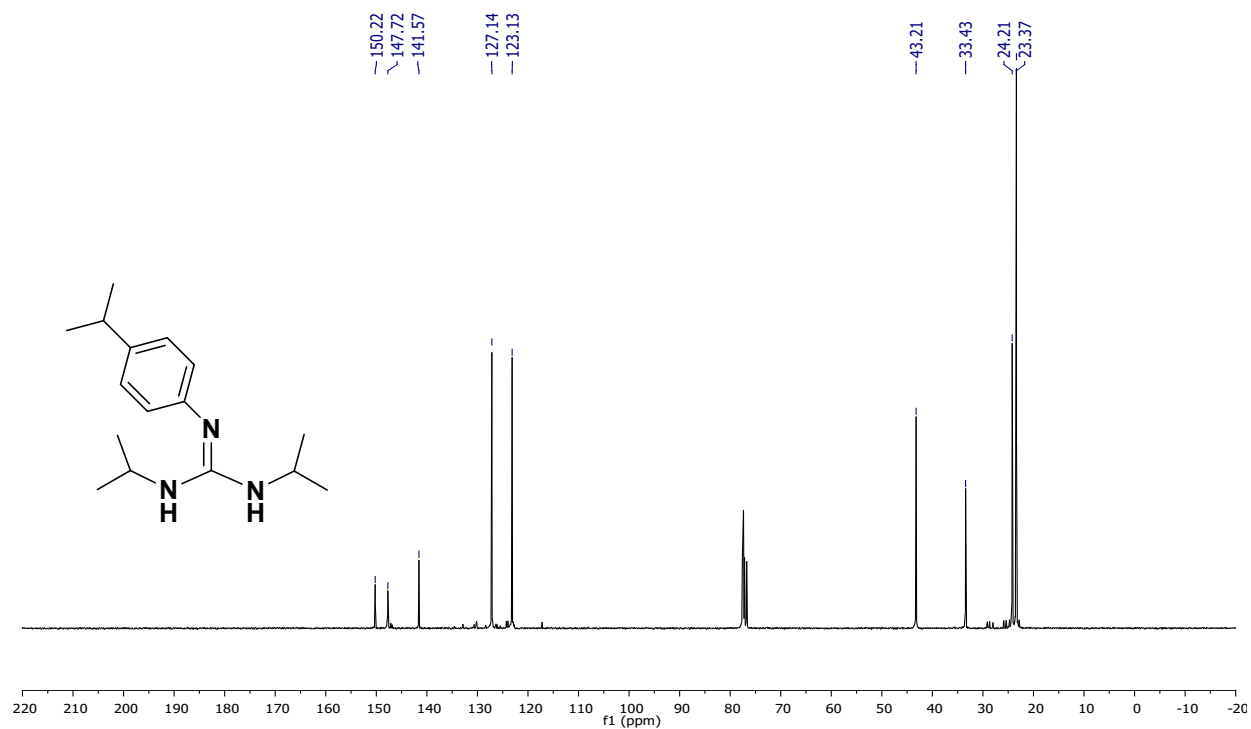

Figure FS19.  $^{13}\text{C}\{^1\text{H}\}$  NMR (75 MHz, 25 °C,  $\text{CDCl}_3$ ) spectrum of 3e.

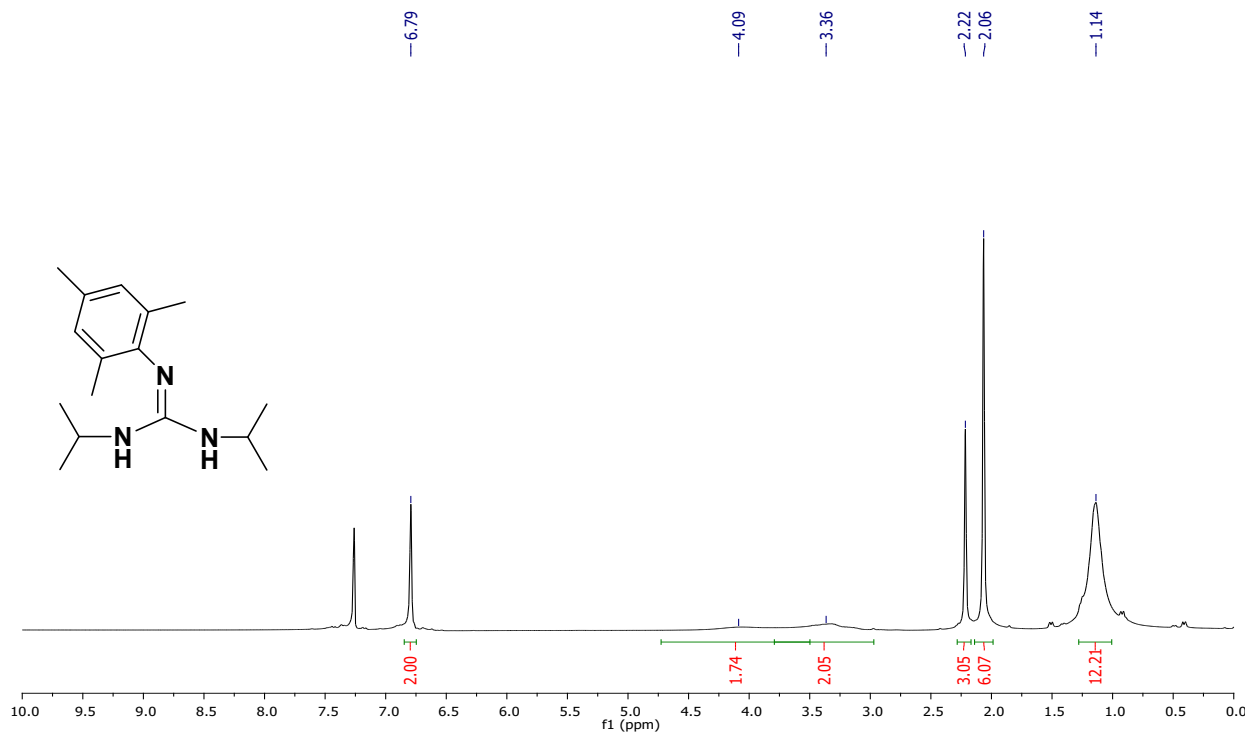

**Figure FS20.** <sup>1</sup>H NMR (300 MHz, 25 °C, CDCl<sub>3</sub>) spectrum of **3f**.

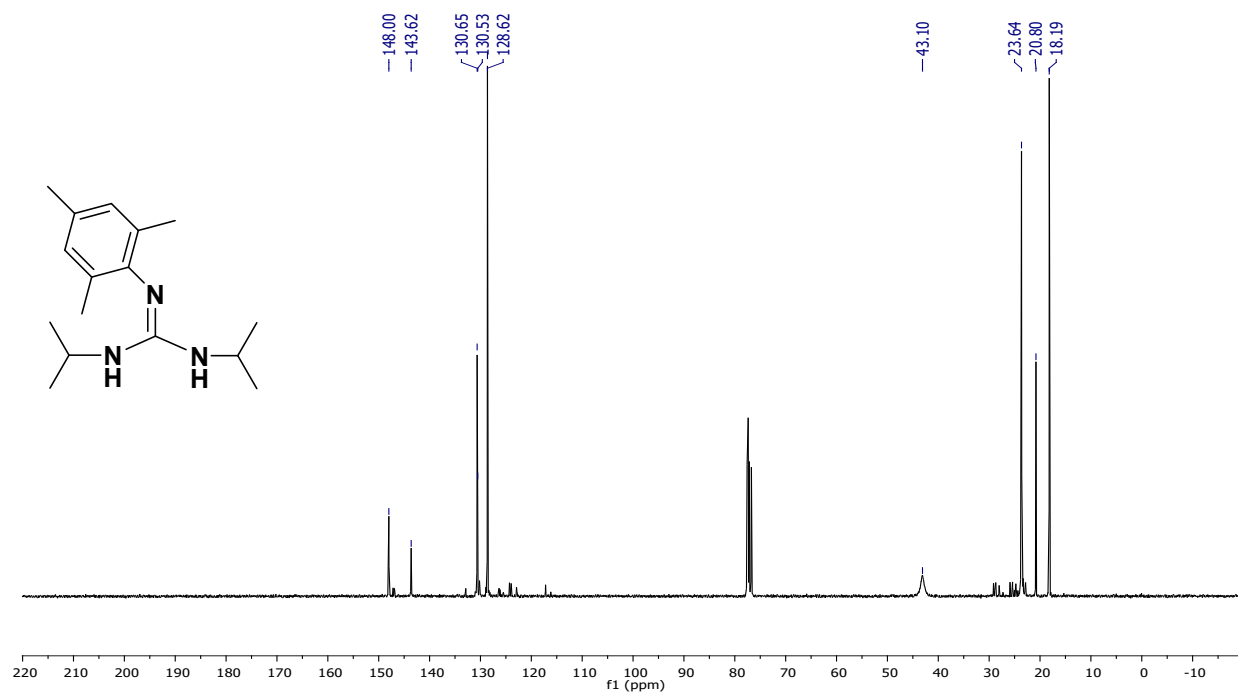

**Figure FS21.** <sup>13</sup>C {<sup>1</sup>H} NMR (75 MHz, 25 °C, CDCl<sub>3</sub>) spectrum of **3f**.

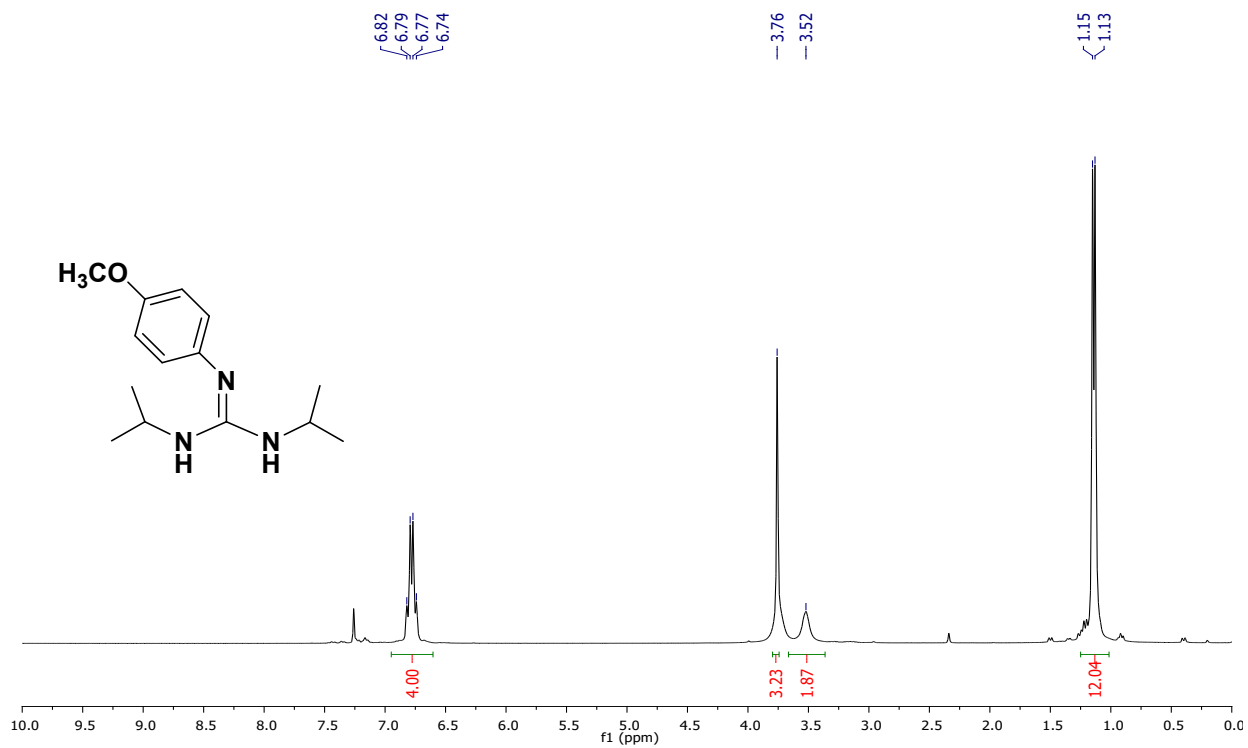

Figure FS22. <sup>1</sup>H NMR (300 MHz, 25 °C, CDCl<sub>3</sub>) spectrum of **3g**.

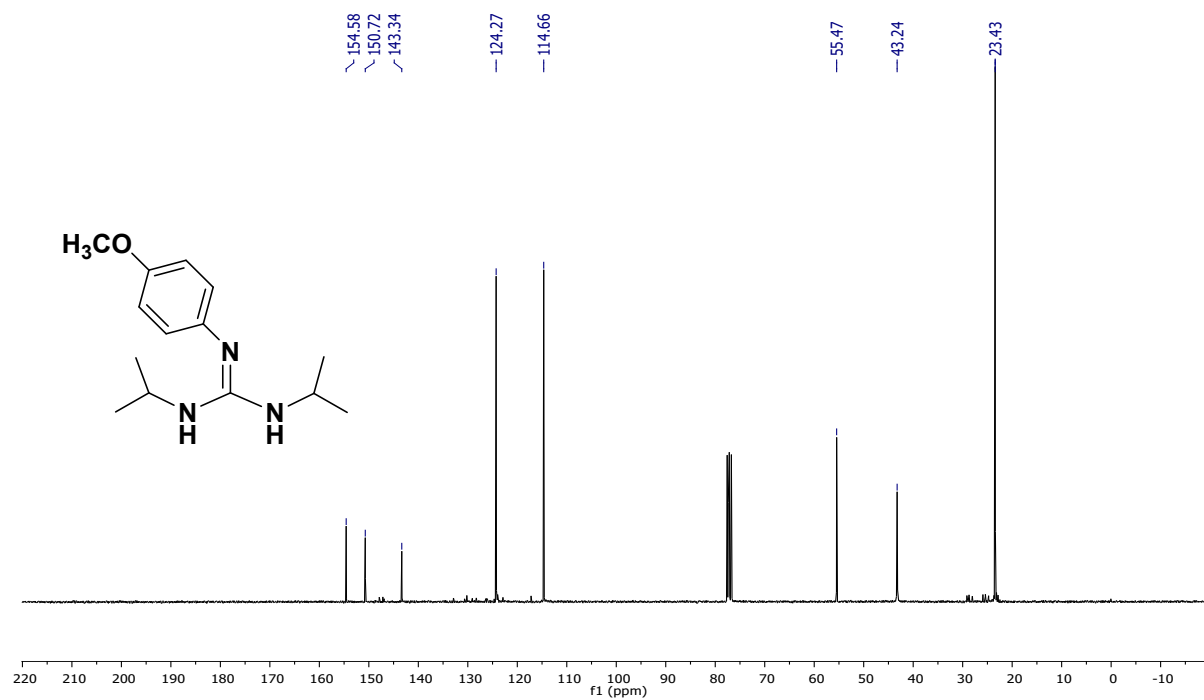

Figure FS23. <sup>13</sup>C {<sup>1</sup>H} NMR (75 MHz, 25 °C, CDCl<sub>3</sub>) spectrum of **3g**

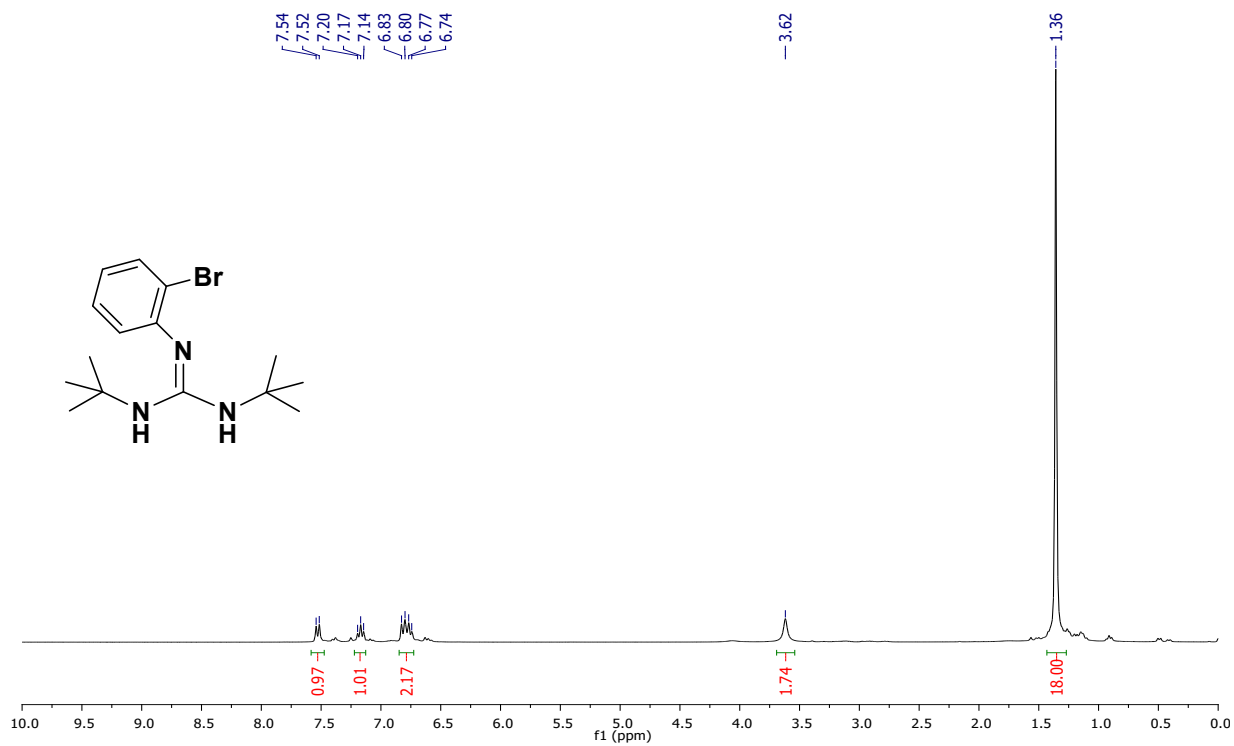

Figure FS24. <sup>1</sup>H NMR (300 MHz, 25 °C, CDCl<sub>3</sub>) spectrum of **3h**.

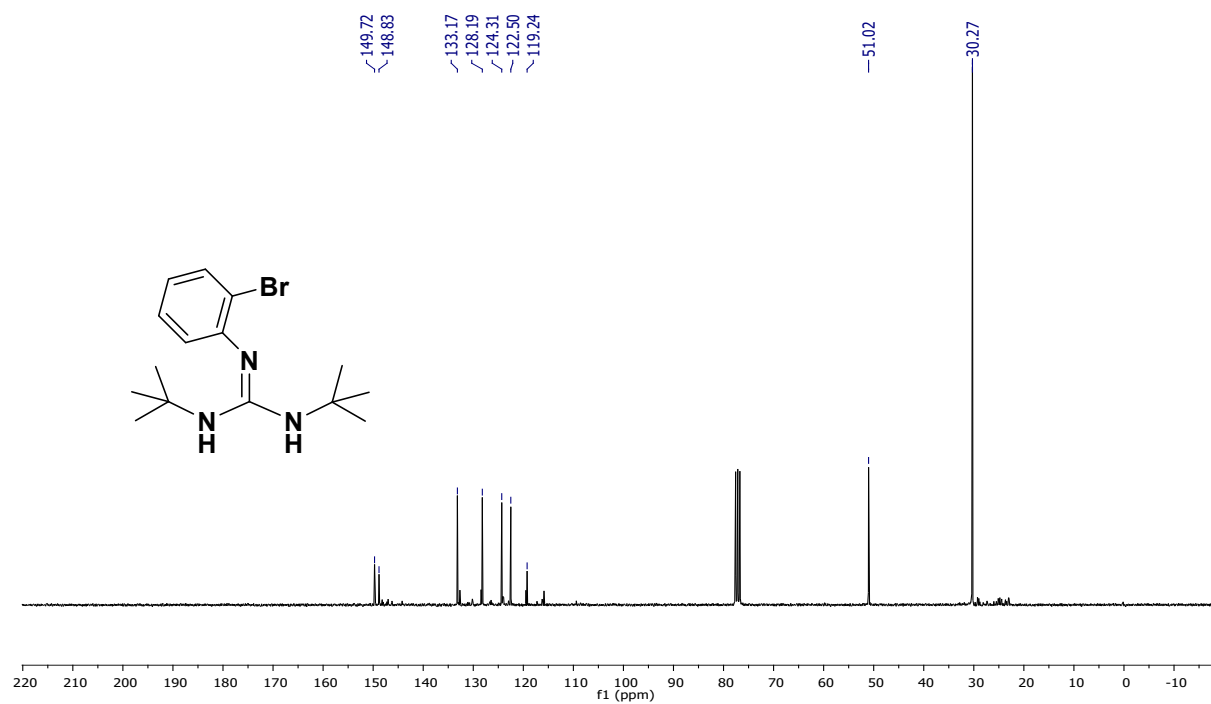

Figure FS25. <sup>13</sup>C {<sup>1</sup>H} NMR (75 MHz, 25 °C, CDCl<sub>3</sub>) spectrum of **3h**.

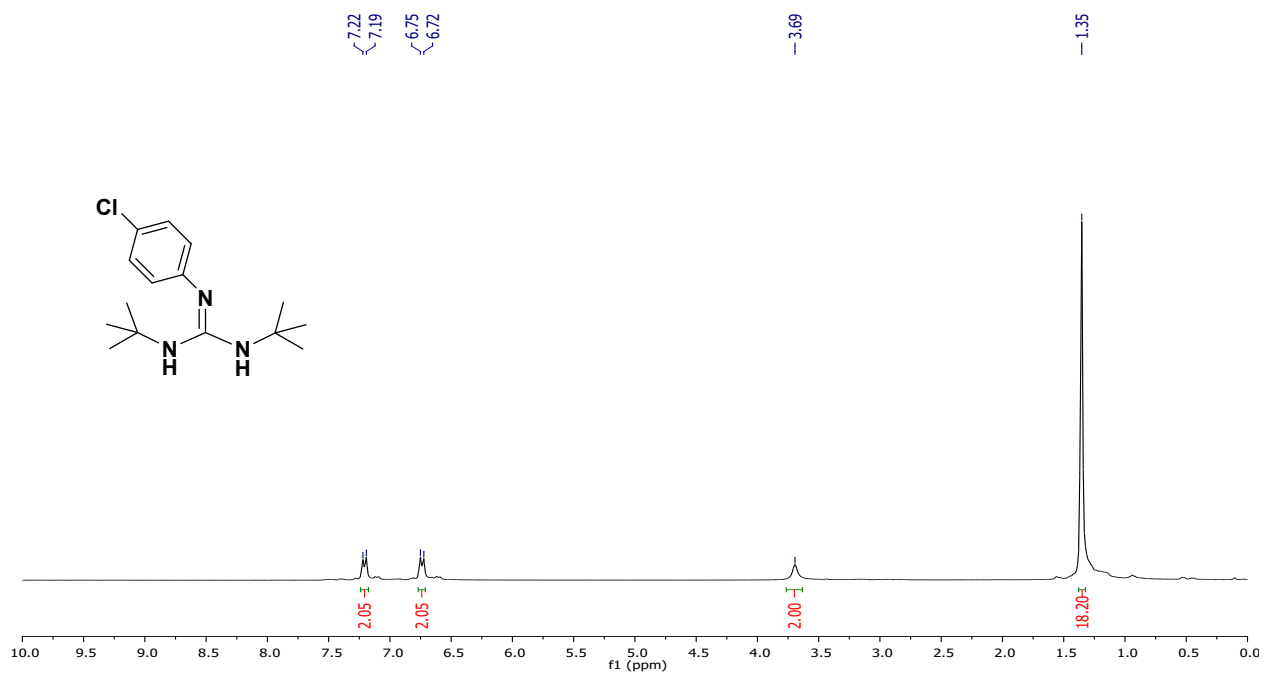

**Figure FS26.** <sup>1</sup>H NMR (300 MHz, 25 °C, CDCl<sub>3</sub>) spectrum of **3i**.

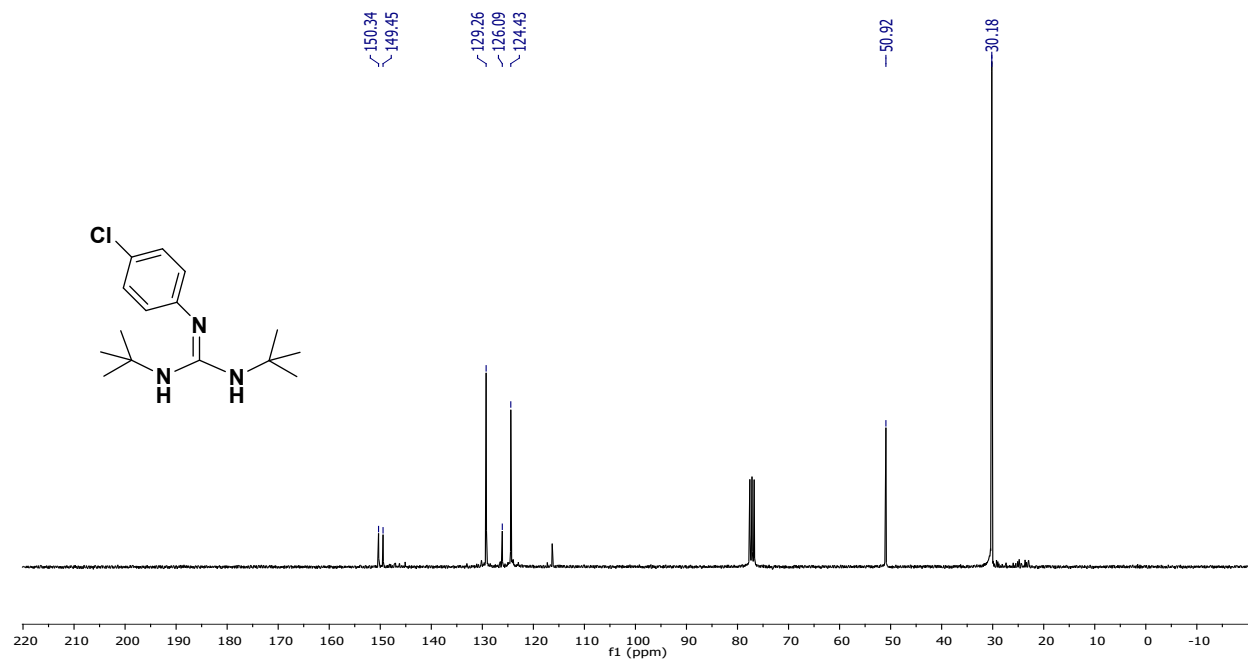

**Figure FS27.** <sup>13</sup>C {<sup>1</sup>H} NMR (75 MHz, 25 °C, CDCl<sub>3</sub>) spectrum of **3i**.

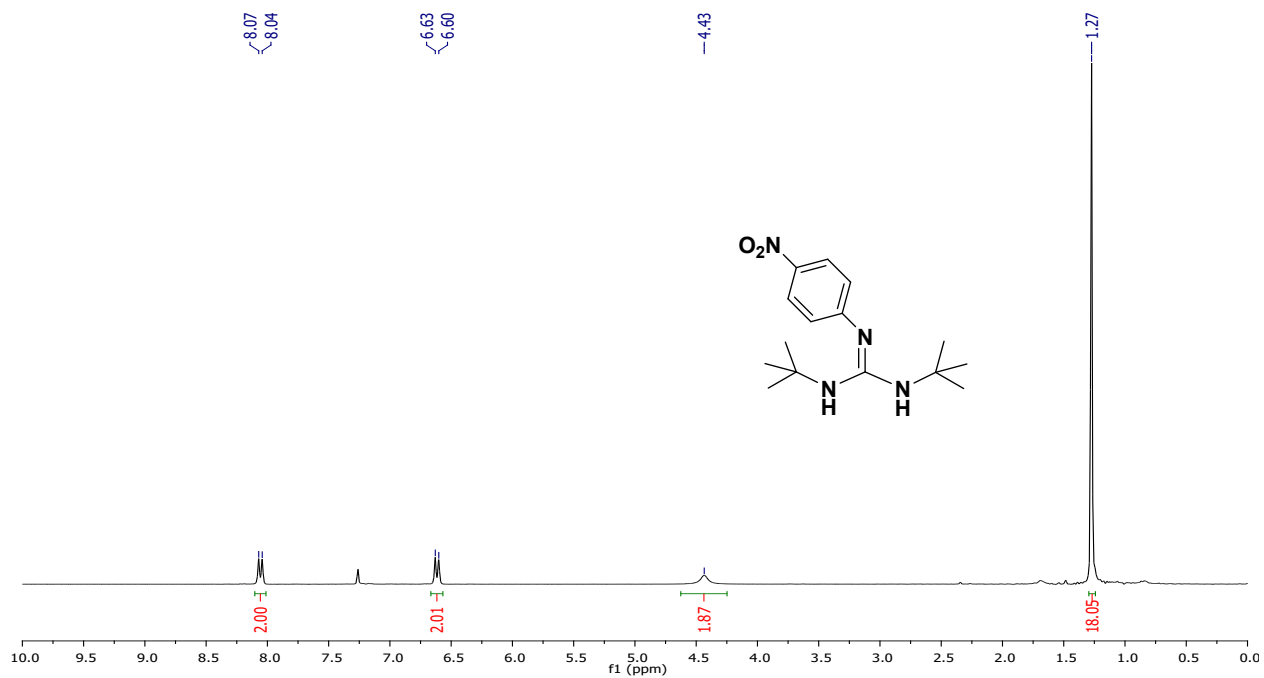

**Figure FS28.**  $^1\text{H}$  NMR (300 MHz, 25 °C,  $\text{CDCl}_3$ ) spectrum of **3j**.

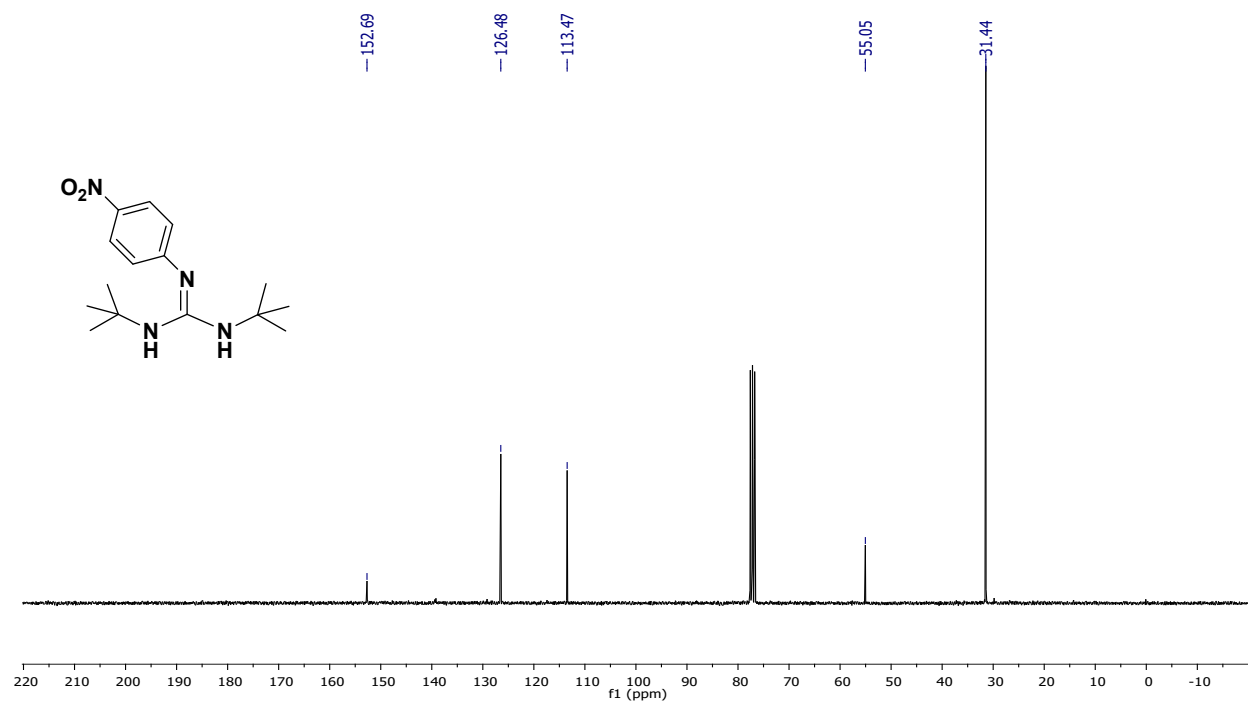

**Figure FS29.**  $^{13}\text{C}\{^1\text{H}\}$  NMR (75 MHz, 25 °C,  $\text{CDCl}_3$ ) spectrum of **3j**.

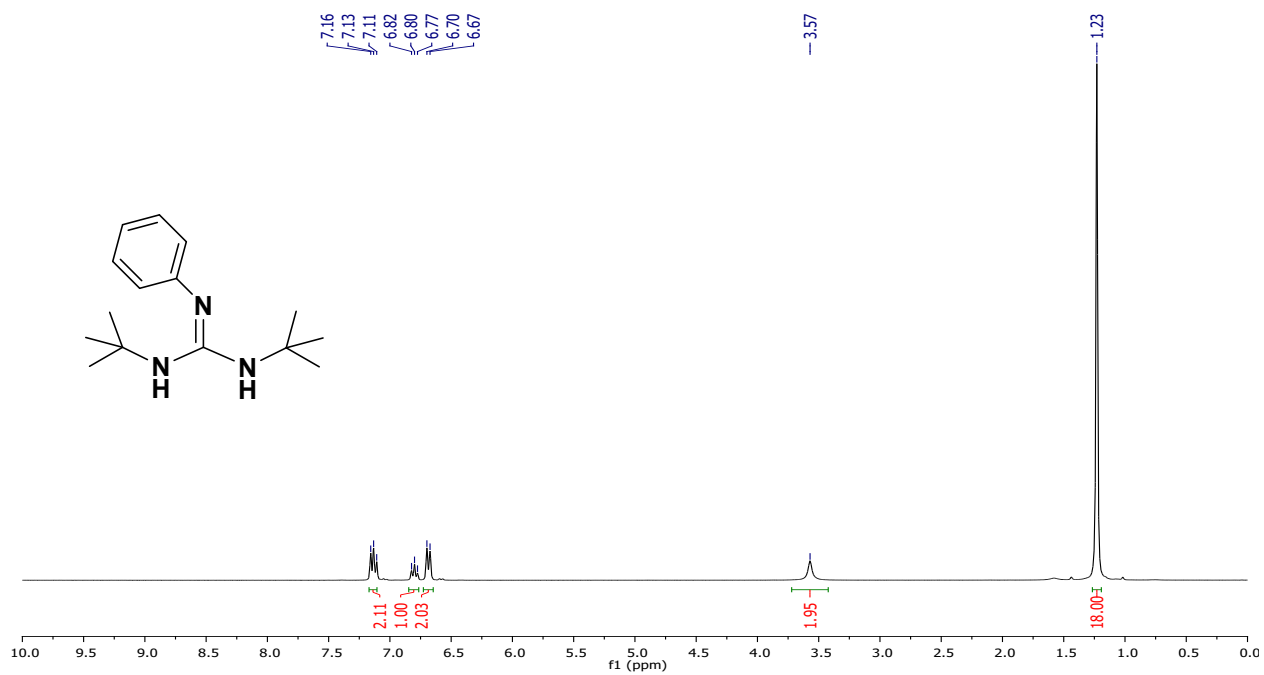

**Figure FS30.** <sup>1</sup>H NMR (300 MHz, 25 °C, CDCl<sub>3</sub>) spectrum of **3k**.

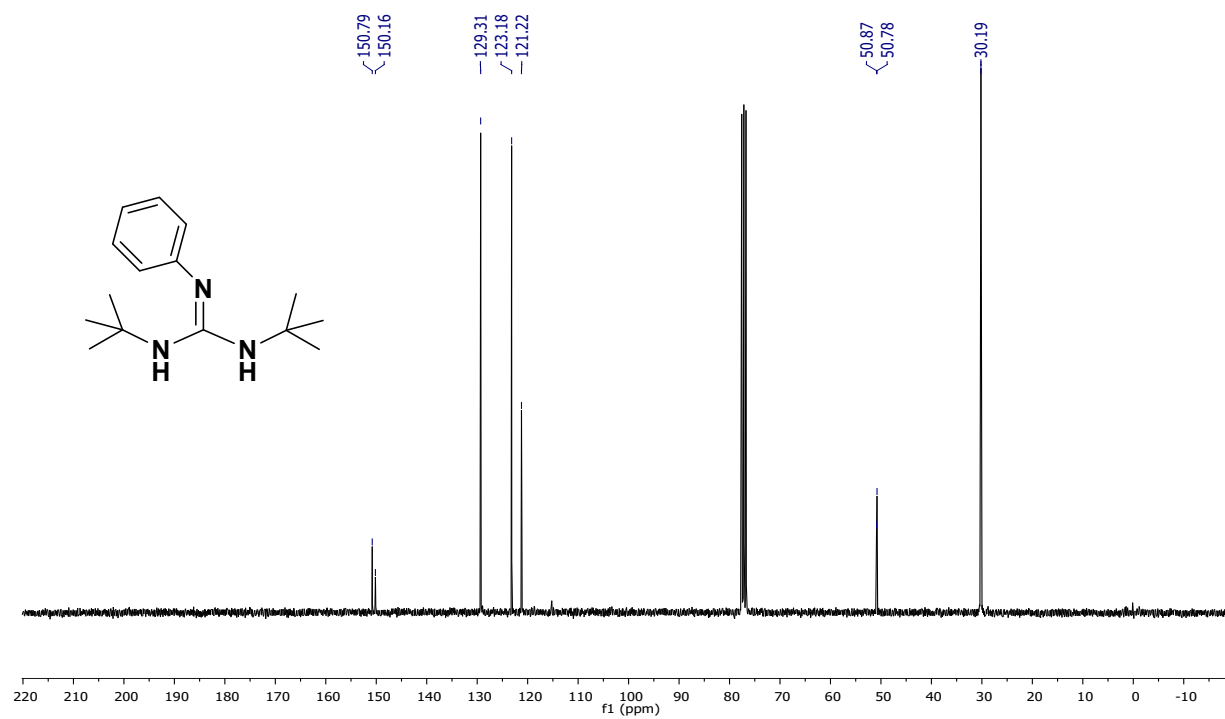

**Figure FS31.** <sup>13</sup>C {<sup>1</sup>H} NMR (75 MHz, 25 °C, CDCl<sub>3</sub>) spectrum of **3k**.

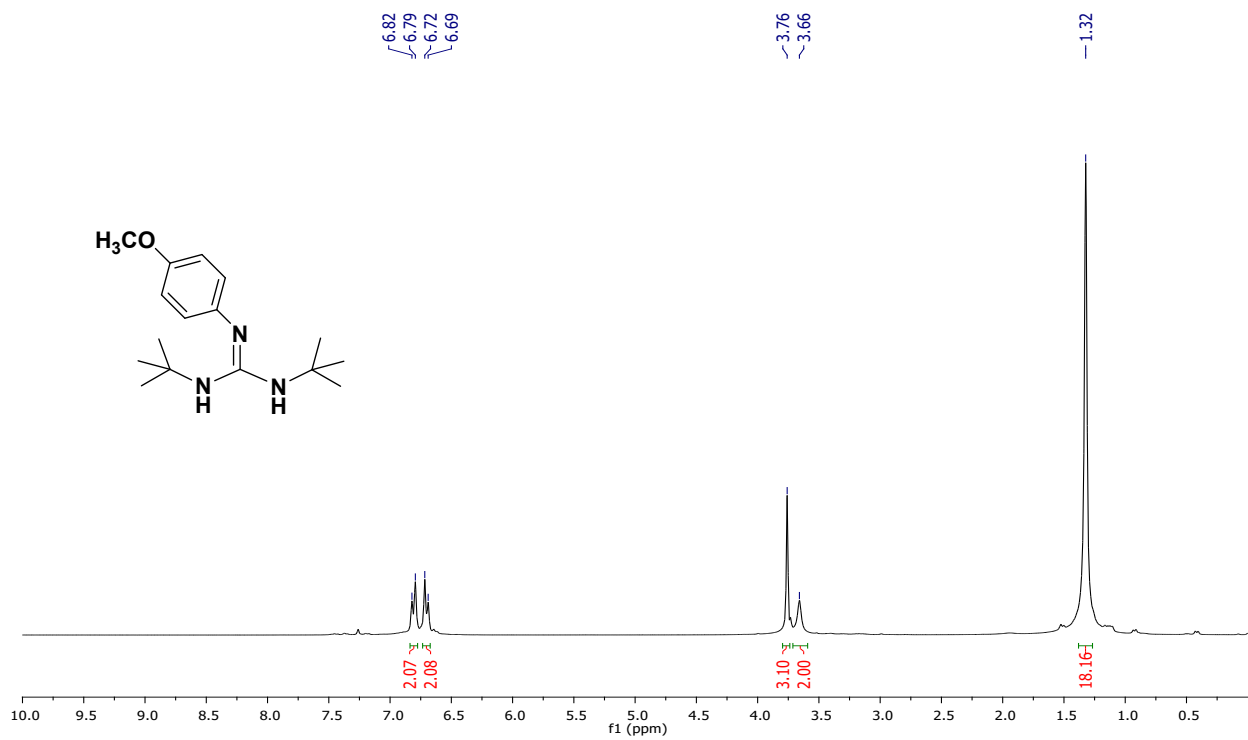

**Figure FS32.**  $^1\text{H}$  NMR (300 MHz, 25 °C,  $\text{CDCl}_3$ ) spectrum of **31**.

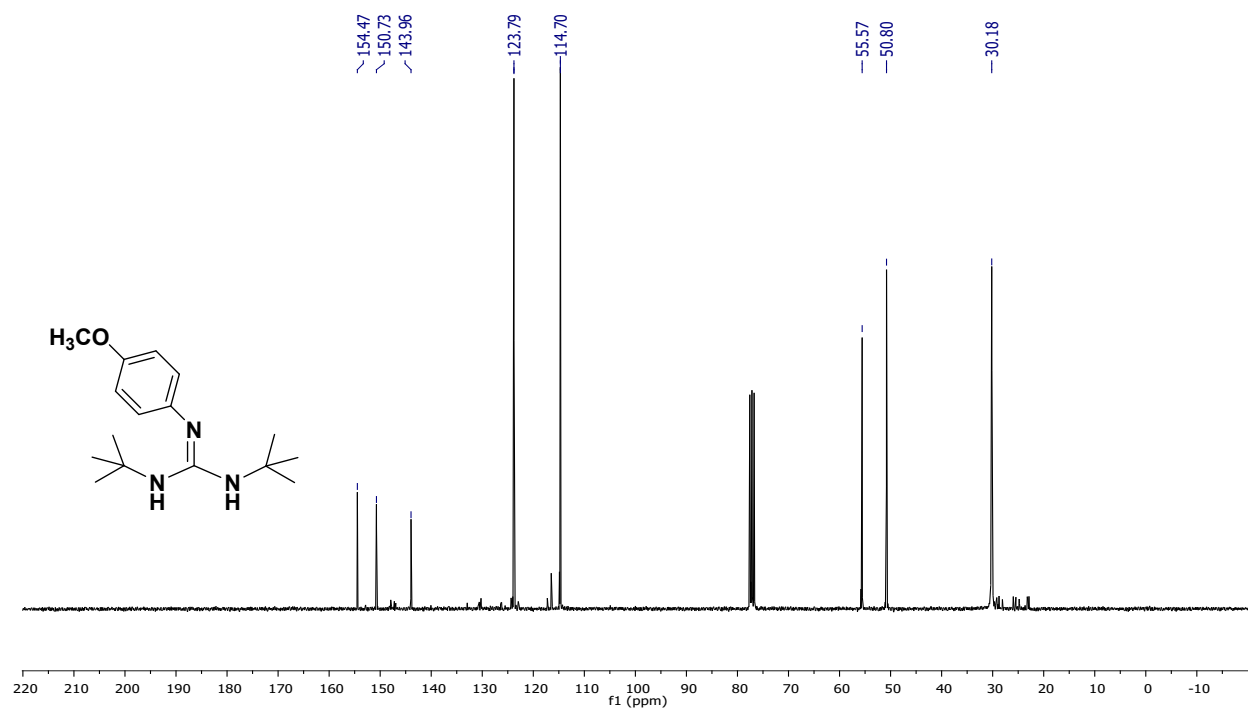

**Figure FS33.**  $^{13}\text{C}\{^1\text{H}\}$  NMR (75 MHz, 25 °C,  $\text{CDCl}_3$ ) spectrum of **31**.



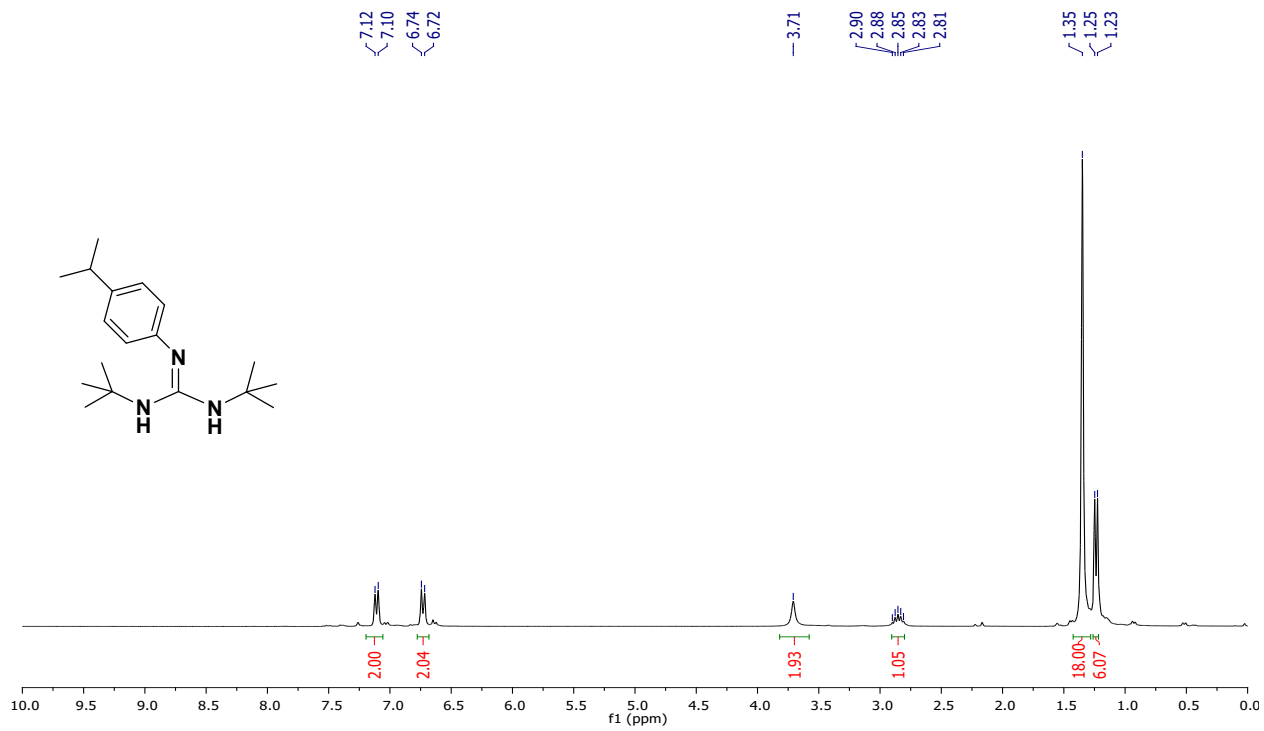

**Figure FS34.** <sup>1</sup>H NMR (300 MHz, 25 °C, CDCl<sub>3</sub>) spectrum of **3m**.

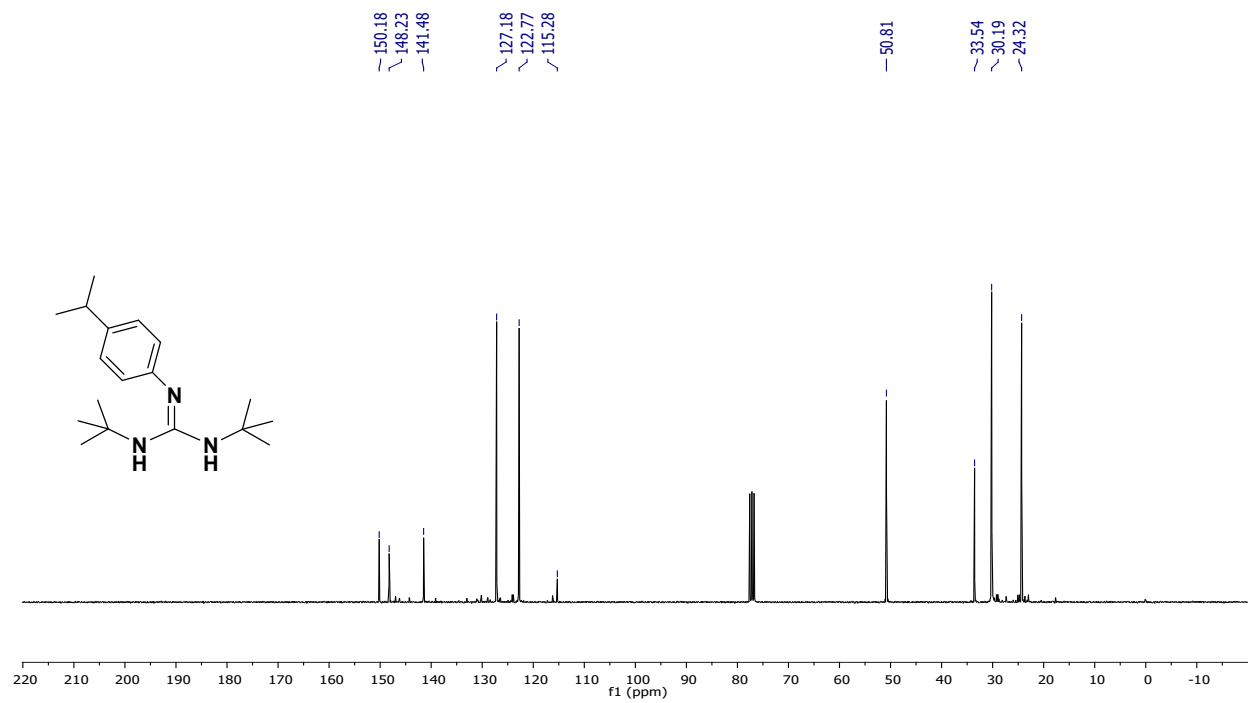

**Figure FS35.** <sup>13</sup>C {<sup>1</sup>H} NMR (75 MHz, 25 °C, CDCl<sub>3</sub>) spectrum of **3m**.

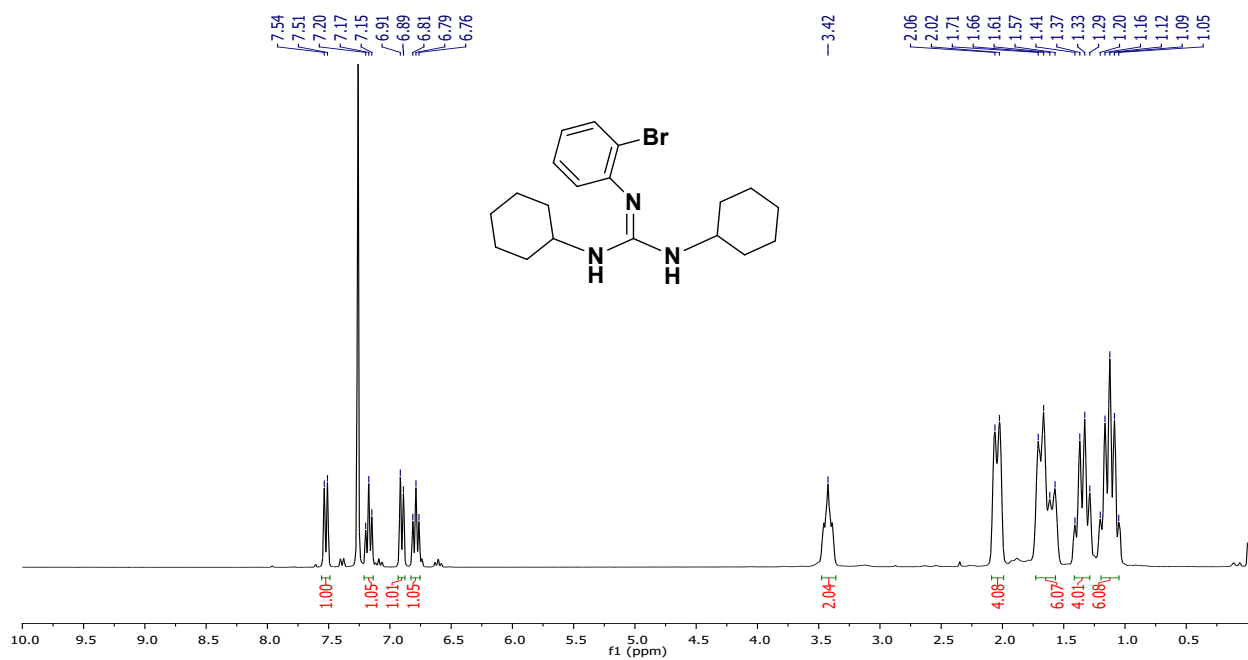

**Figure FS36.**  $^1\text{H}$  NMR (300 MHz, 25 °C,  $\text{CDCl}_3$ ) spectrum of **3n**.

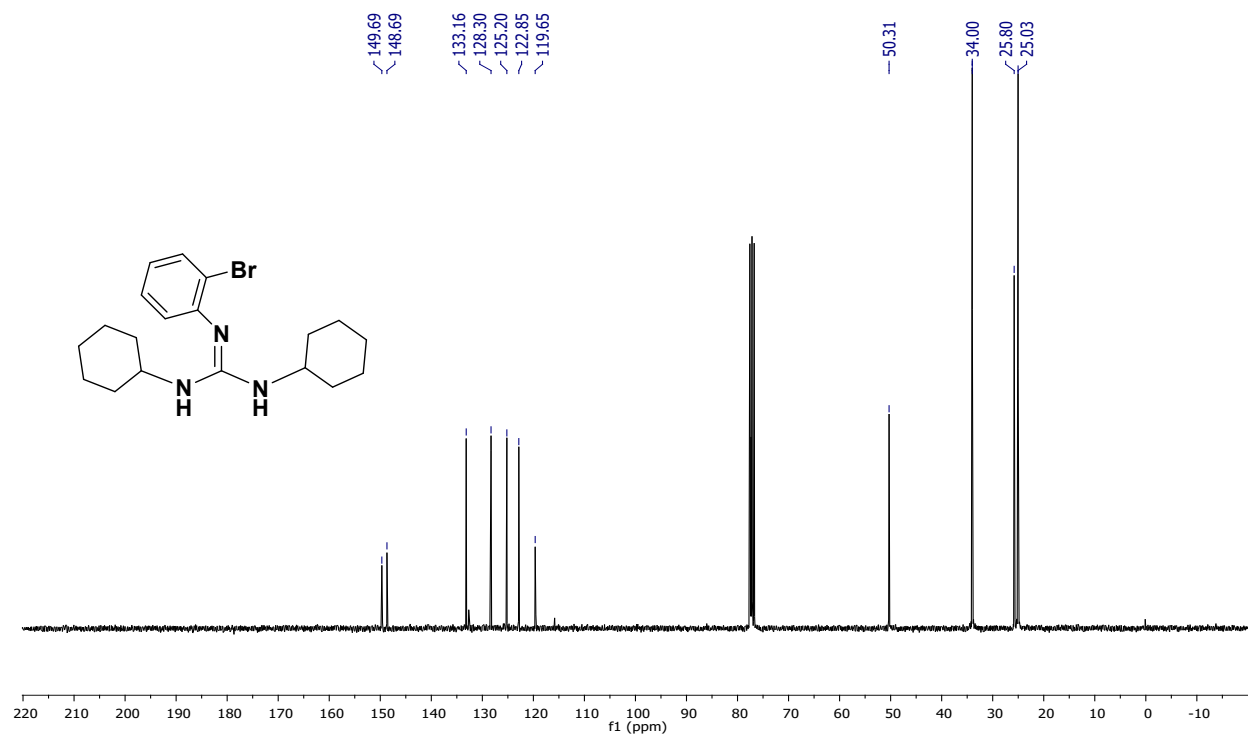

**Figure FS37.**  $^{13}\text{C}\{^1\text{H}\}$  NMR (75 MHz, 25 °C,  $\text{CDCl}_3$ ) spectrum of **3n**.

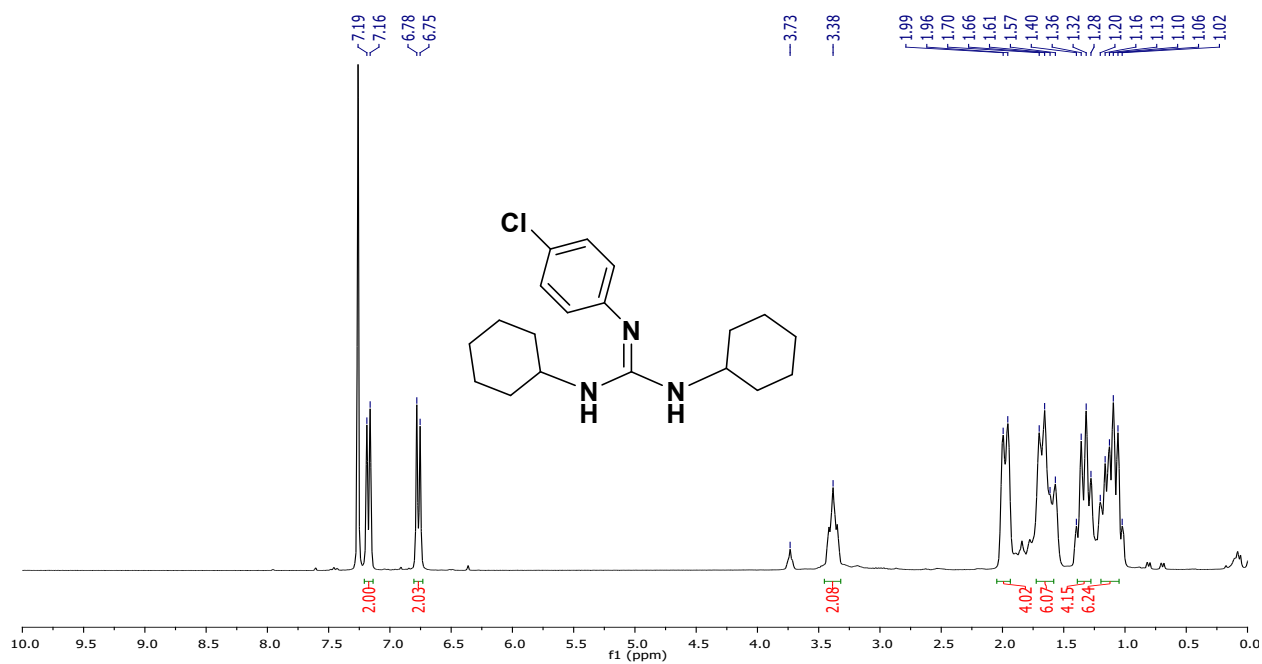

Figure FS38. <sup>1</sup>H NMR (300 MHz, 25 °C, CDCl<sub>3</sub>) spectrum of **30**.

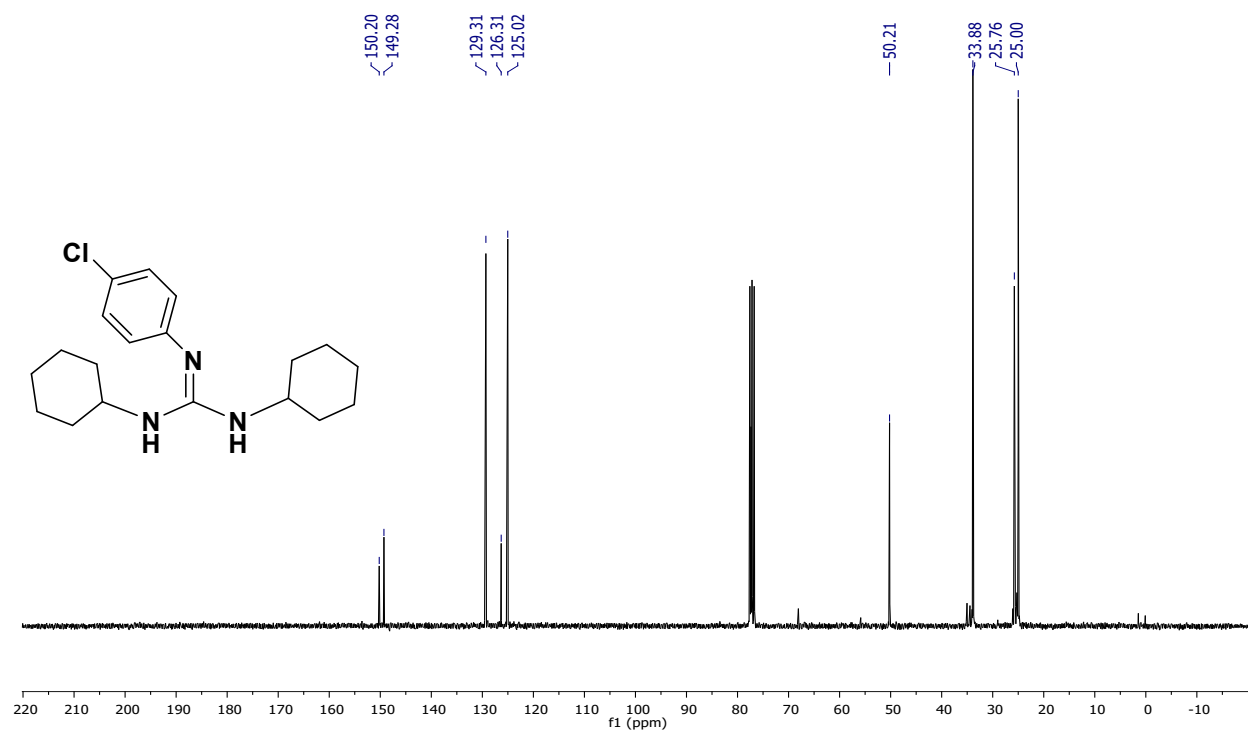

Figure FS39. <sup>13</sup>C {<sup>1</sup>H} NMR (75 MHz, 25 °C, CDCl<sub>3</sub>) spectrum of **30**.

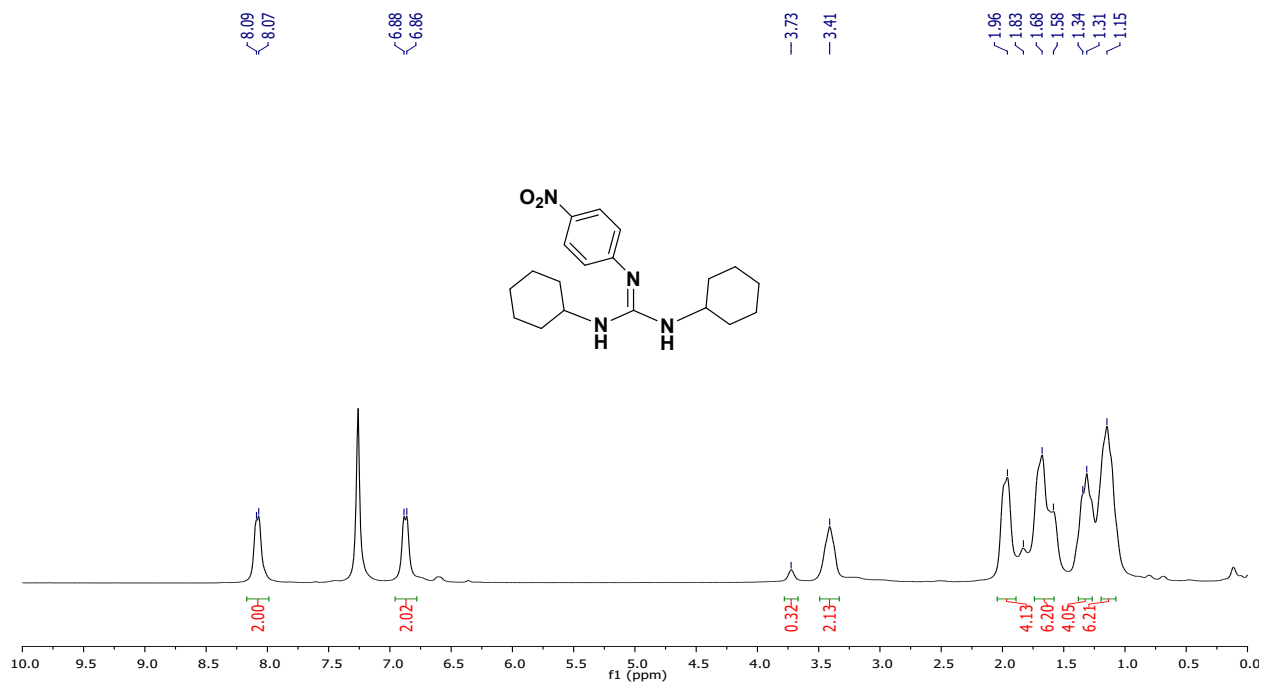

**Figure FS40.** <sup>1</sup>H NMR (300 MHz, 25 °C, CDCl<sub>3</sub>) spectrum of **3p**.

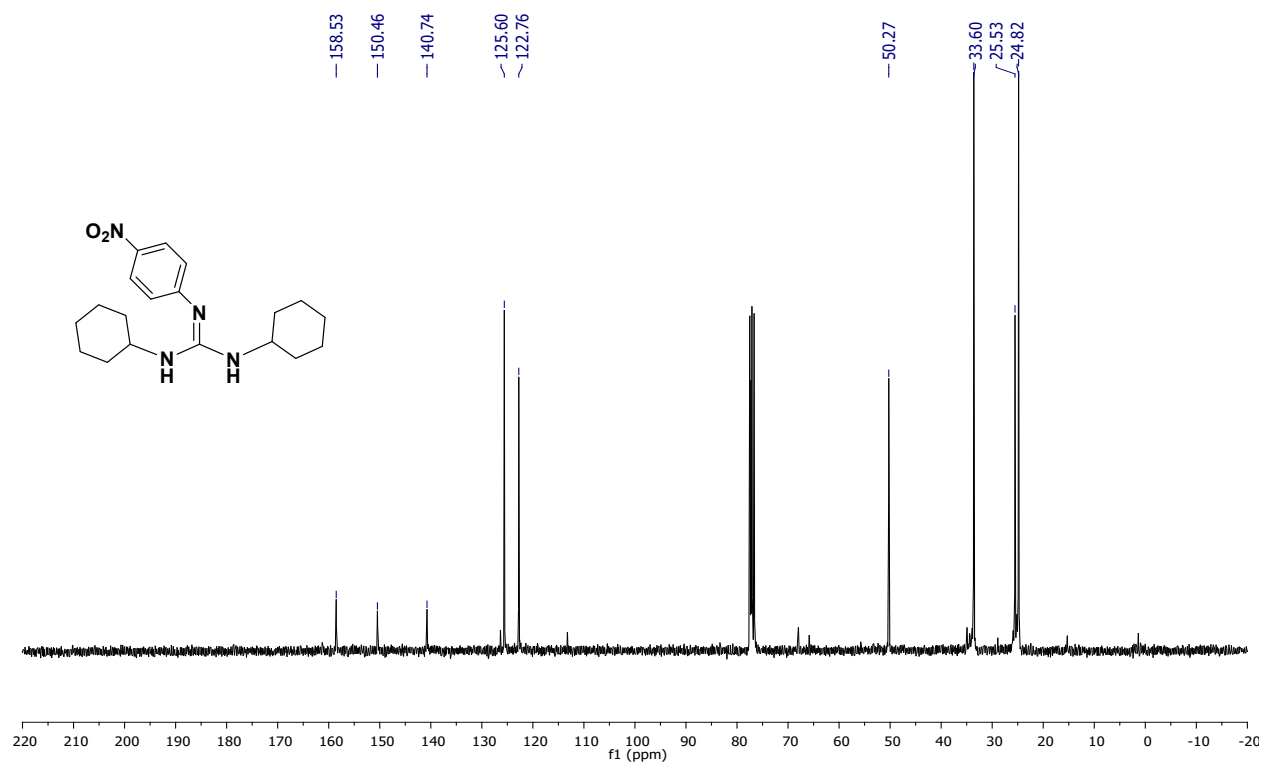

**Figure FS41.** <sup>13</sup>C {<sup>1</sup>H} NMR (75 MHz, 25 °C, CDCl<sub>3</sub>) spectrum of **3p**.

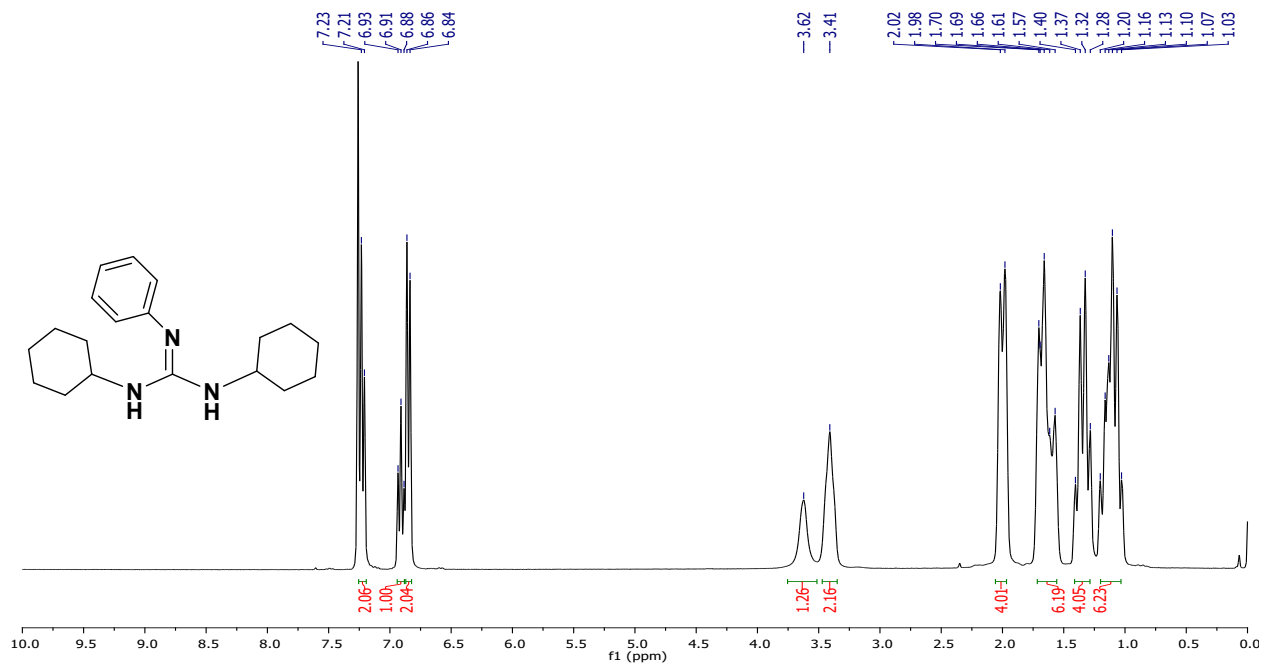

**Figure FS42.** <sup>1</sup>H NMR (300 MHz, 25 °C, CDCl<sub>3</sub>) spectrum of **3q**.

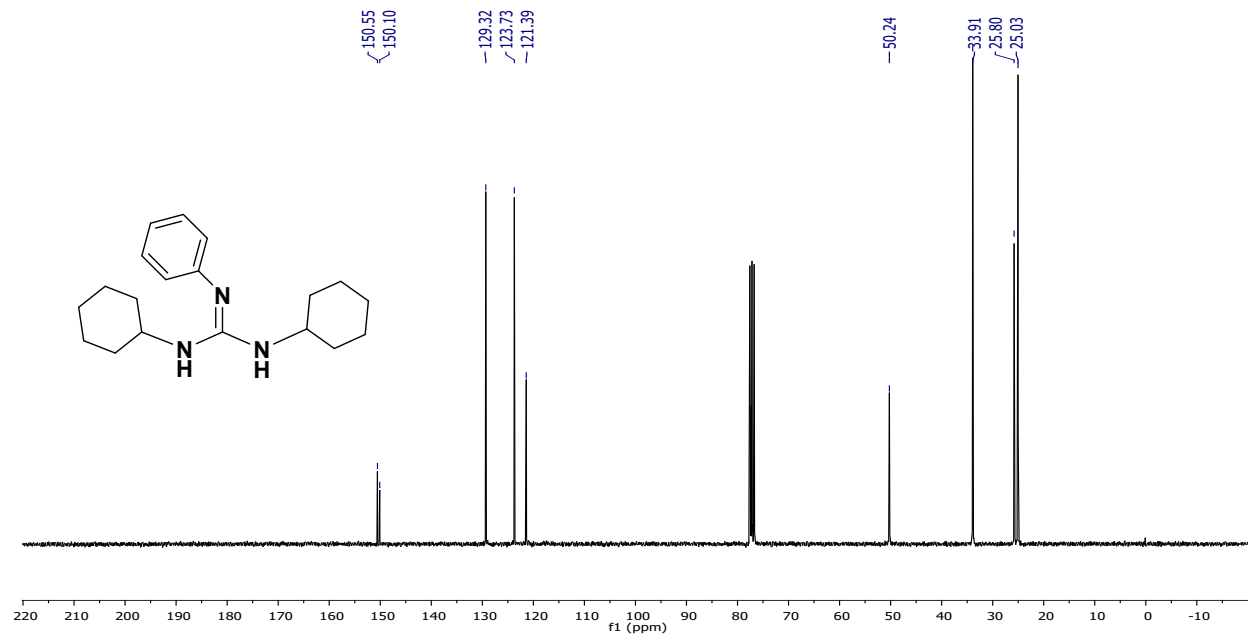

**Figure FS43.** <sup>13</sup>C {<sup>1</sup>H} NMR (75 MHz, 25 °C, CDCl<sub>3</sub>) spectrum of **3q**.

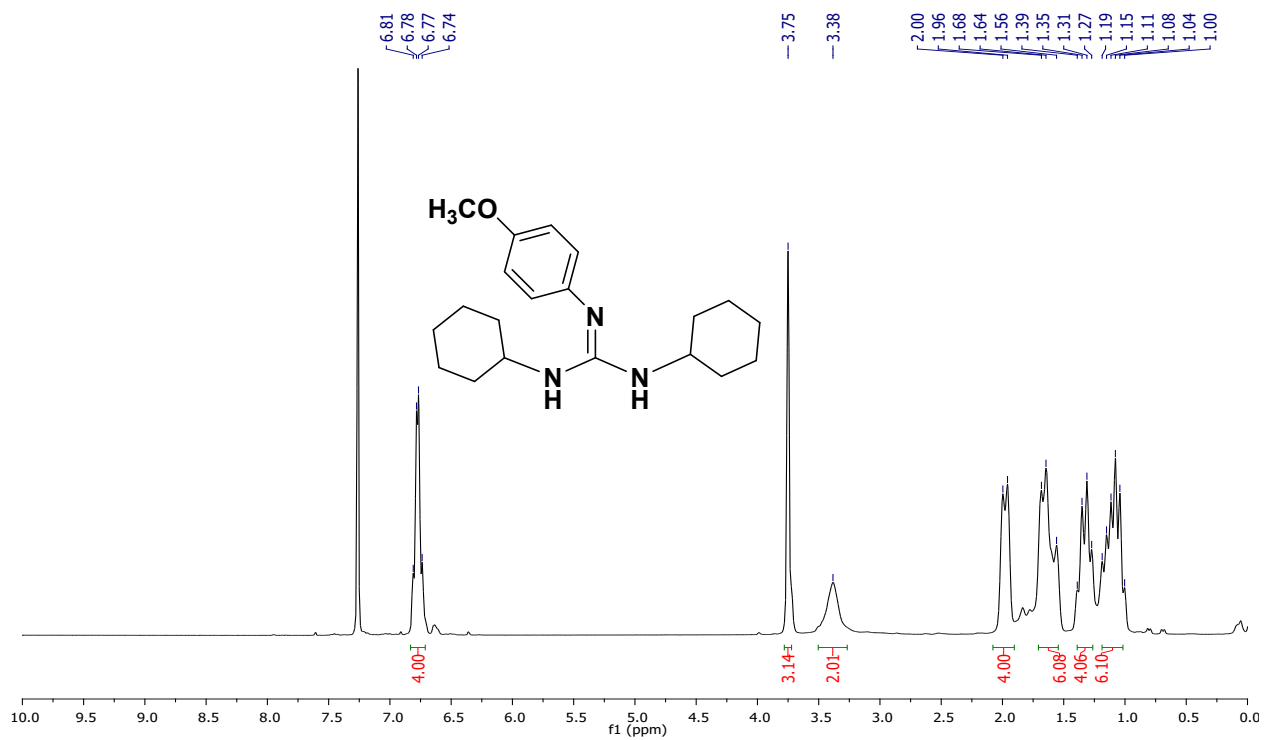

Figure FS44.  $^1\text{H}$  NMR (300 MHz, 25 °C,  $\text{CDCl}_3$ ) spectrum of **3r**.

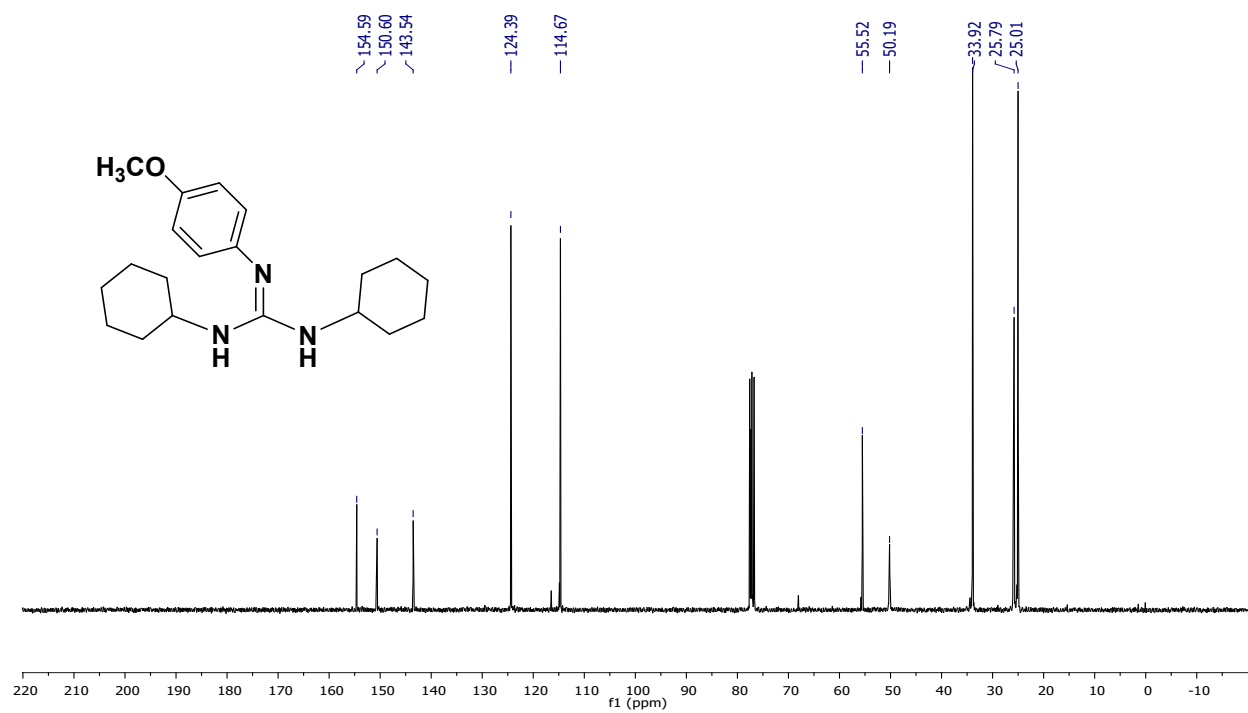

Figure FS45.  $^{13}\text{C}\{^1\text{H}\}$  NMR (75 MHz, 25 °C,  $\text{CDCl}_3$ ) spectrum of **3r**.

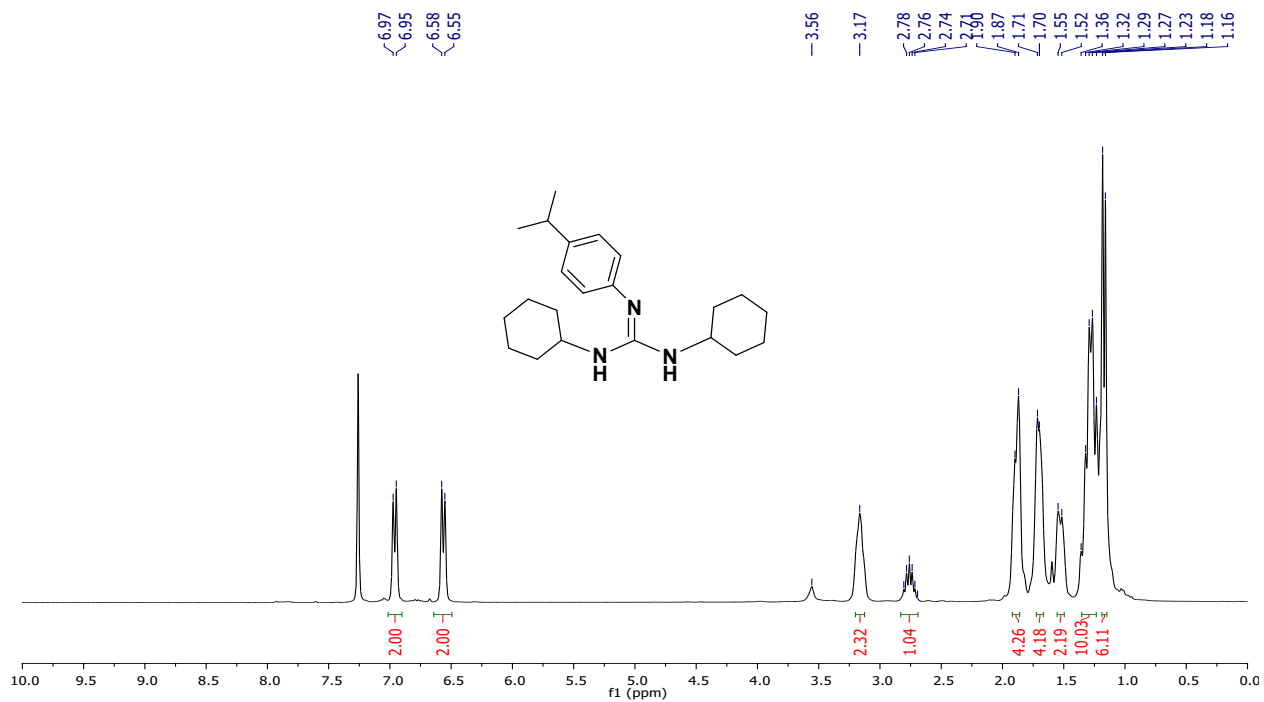

**Figure FS46.** <sup>1</sup>H NMR (300 MHz, 25 °C, CDCl<sub>3</sub>) spectrum of 3s.

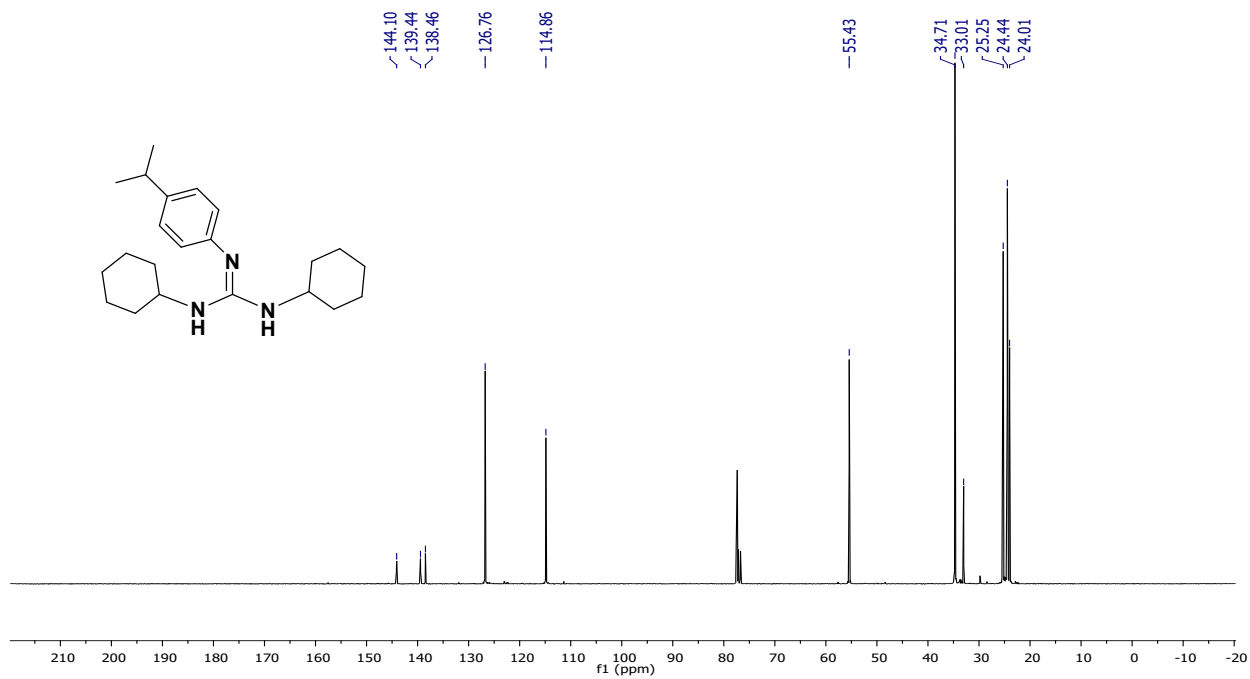

**Figure FS47.** <sup>13</sup>C {<sup>1</sup>H} NMR (75 MHz, 25 °C, CDCl<sub>3</sub>) spectrum of 3s.

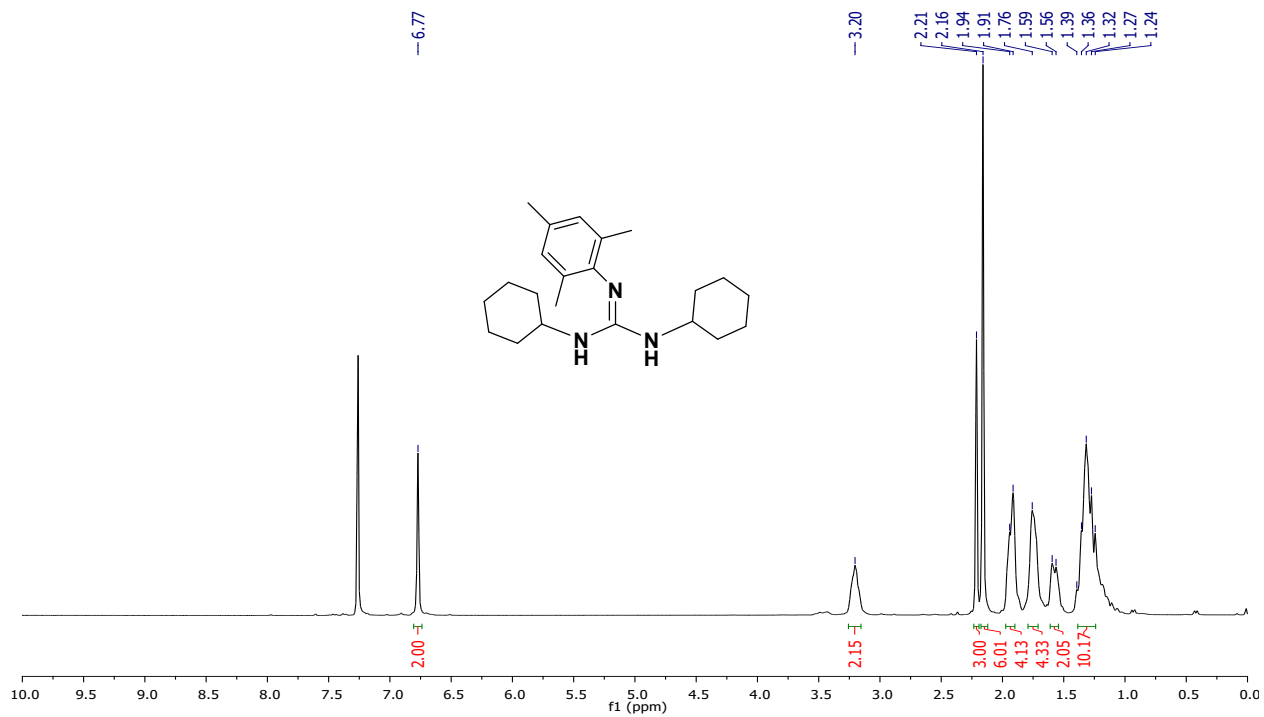

Figure FS48.  $^1\text{H}$  NMR (300 MHz, 25 °C,  $\text{CDCl}_3$ ) spectrum of **3t**.

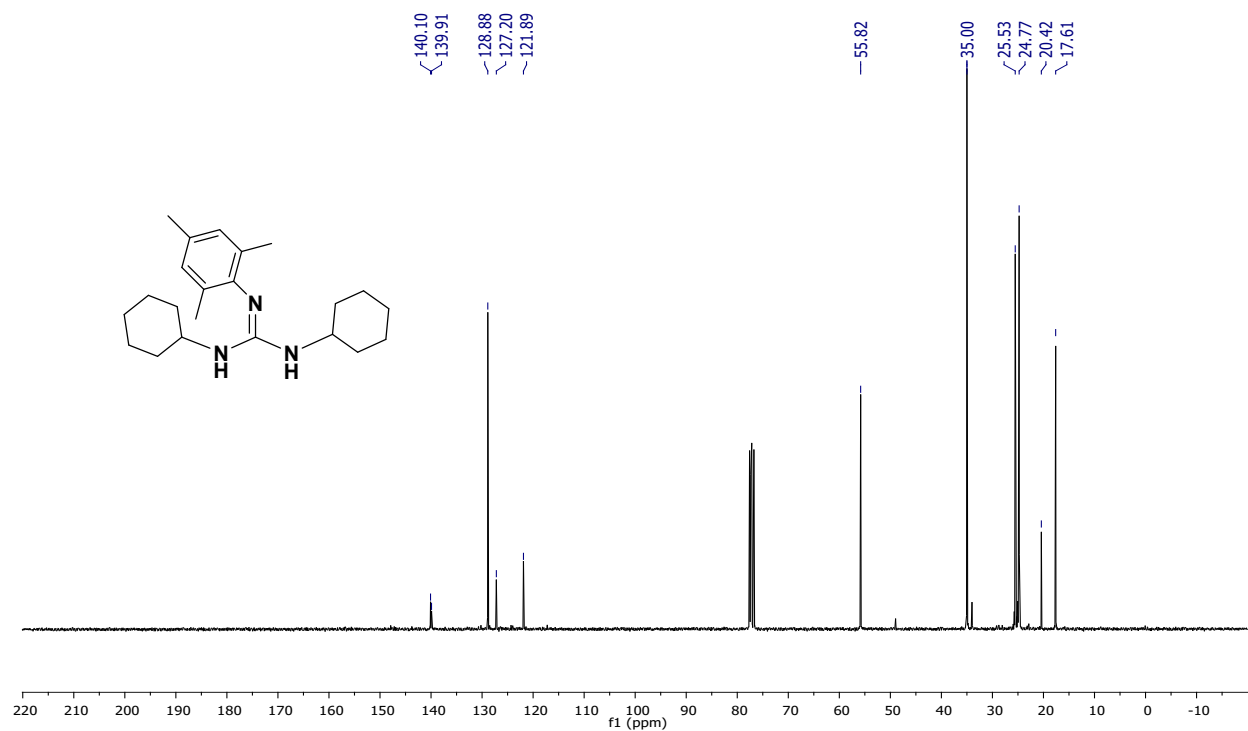

Figure FS49.  $^{13}\text{C}\{^1\text{H}\}$  NMR (75 MHz, 25 °C,  $\text{CDCl}_3$ ) spectrum of **3t**.



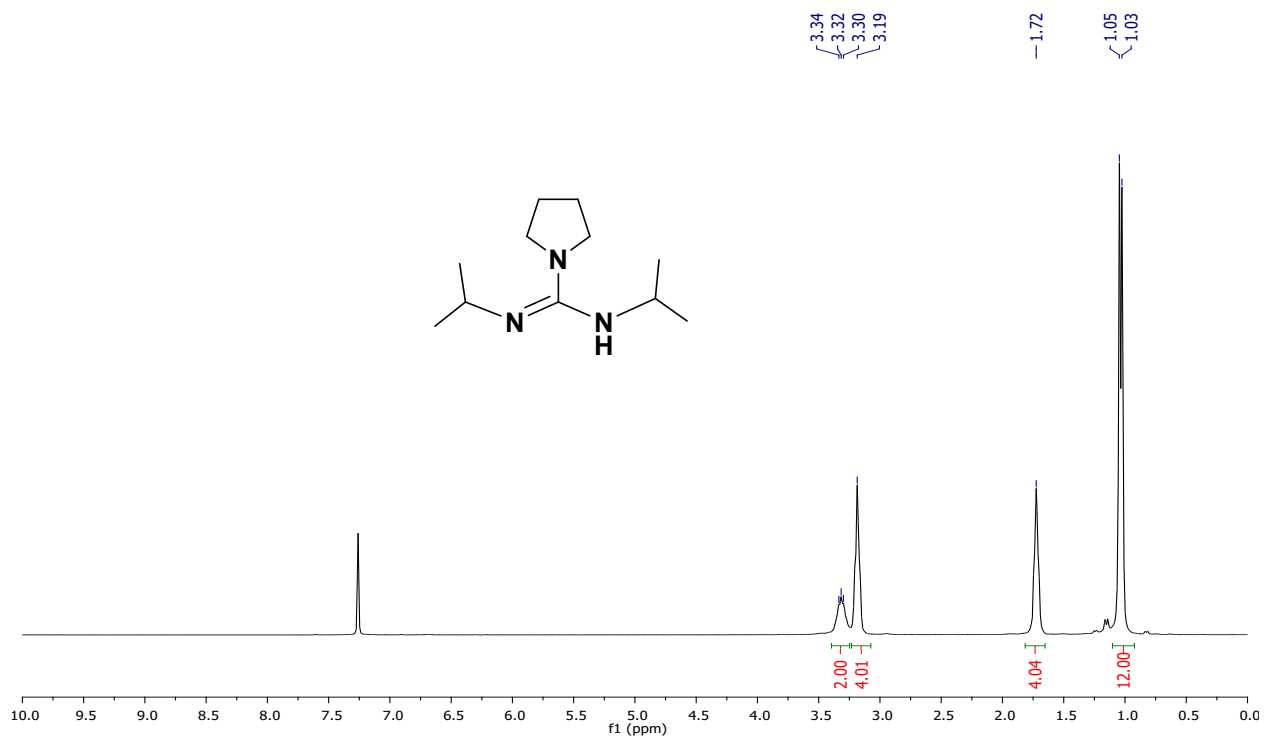

**Figure FS50.**  $^1\text{H}$  NMR (300 MHz, 25 °C,  $\text{CDCl}_3$ ) spectrum of **3u**.

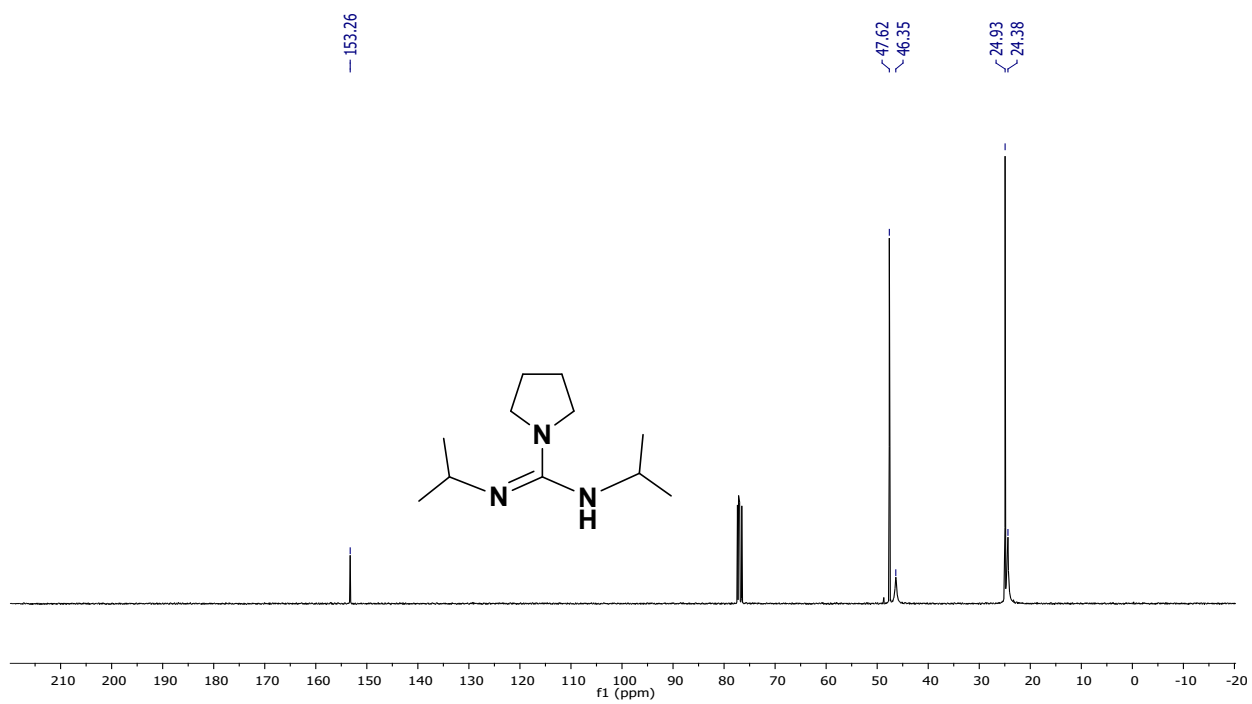

**Figure FS51.**  $^{13}\text{C}$   $\{^1\text{H}\}$  NMR (75 MHz, 25 °C,  $\text{CDCl}_3$ ) spectrum of **3u**.

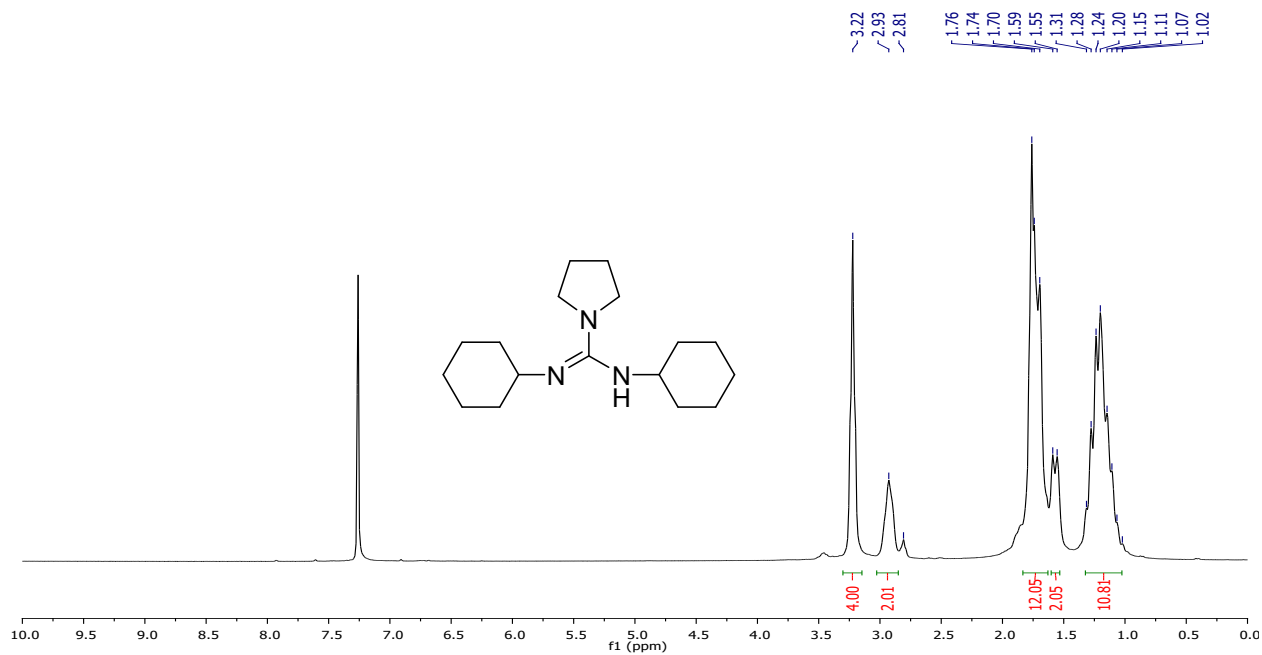

**Figure FS52.**  $^1\text{H}$  NMR (300 MHz, 25 °C,  $\text{CDCl}_3$ ) spectrum of 3v.

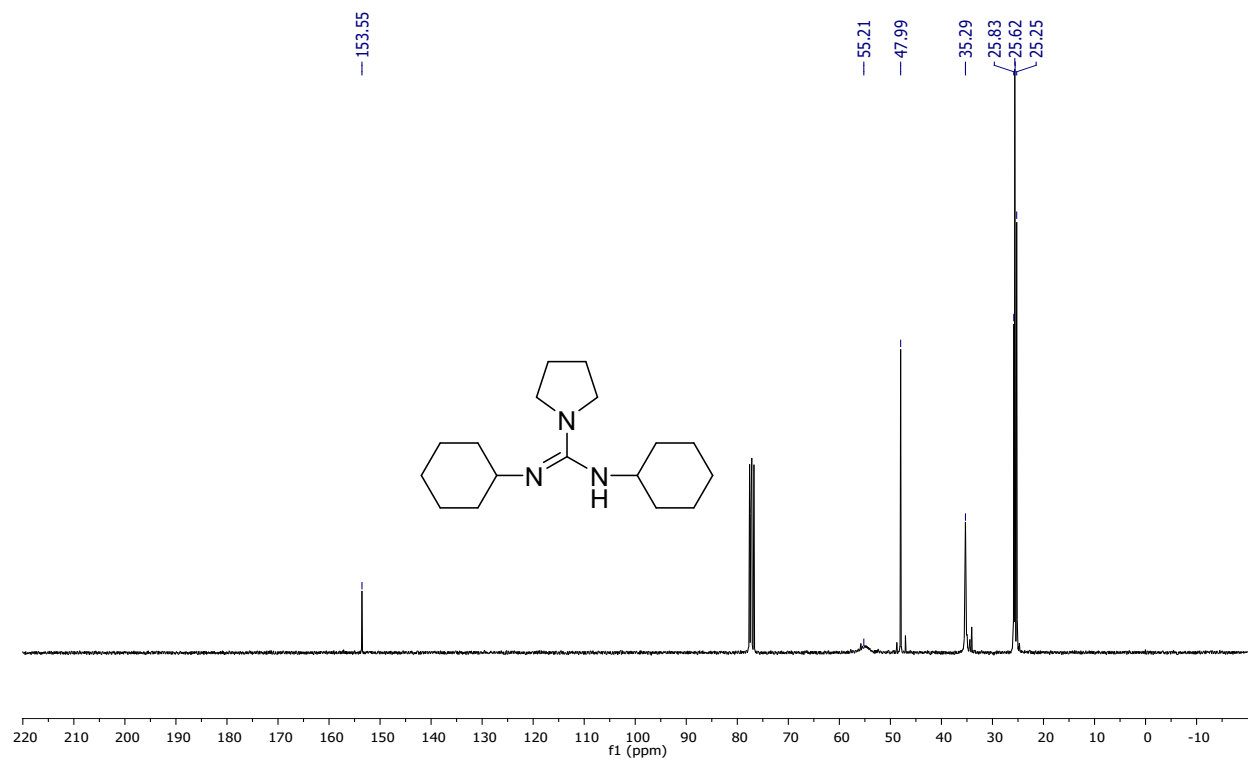

**Figure FS53.**  $^{13}\text{C}\{^1\text{H}\}$  NMR (75 MHz, 25 °C,  $\text{CDCl}_3$ ) spectrum of 3v.

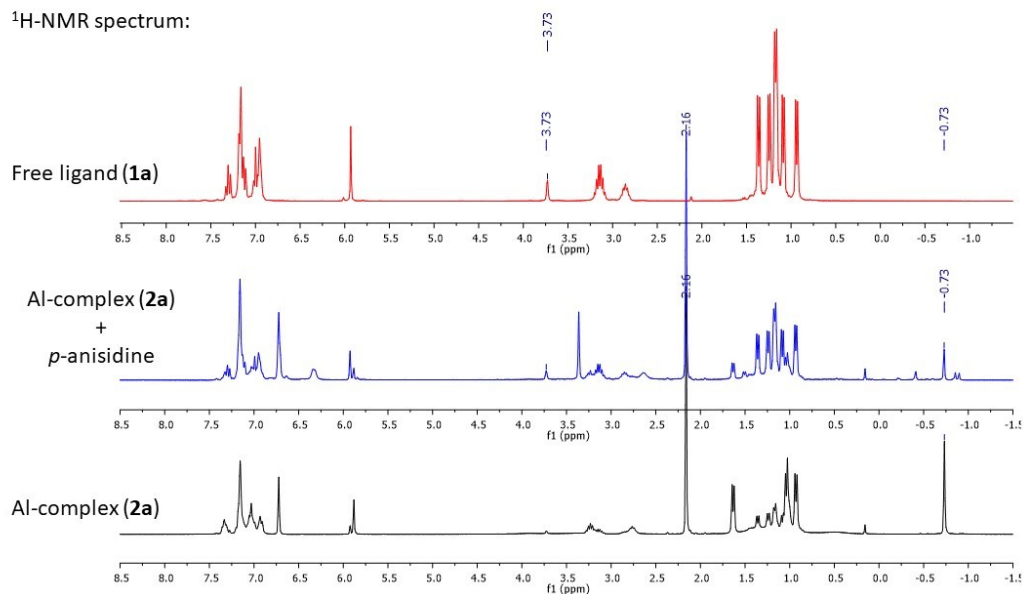

**Figure FS54.** <sup>1</sup>H NMR (300 MHz, 25 °C, C<sub>6</sub>D<sub>6</sub>) spectrum of stoichiometric reaction between complex **2a** and *p*-anisidine (1:2) after 5 h at room temperature.

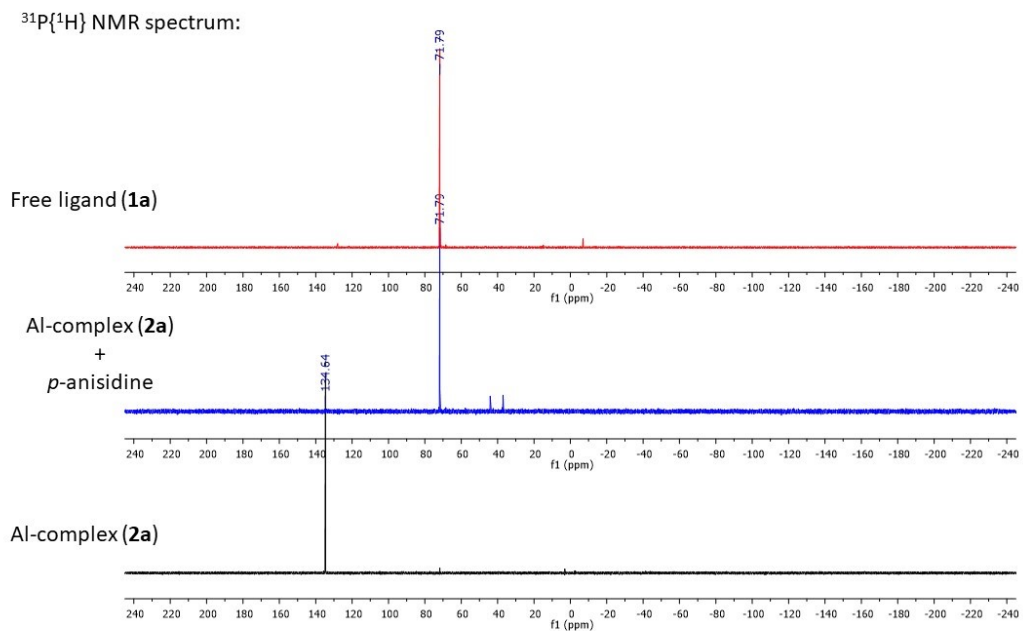

**Figure FS55.** <sup>31</sup>P{<sup>1</sup>H} NMR (300 MHz, 25 °C, C<sub>6</sub>D<sub>6</sub>) spectrum of stoichiometric reaction between complex **2a** and *p*-anisidine (1:2) after 5 h at room temperature.

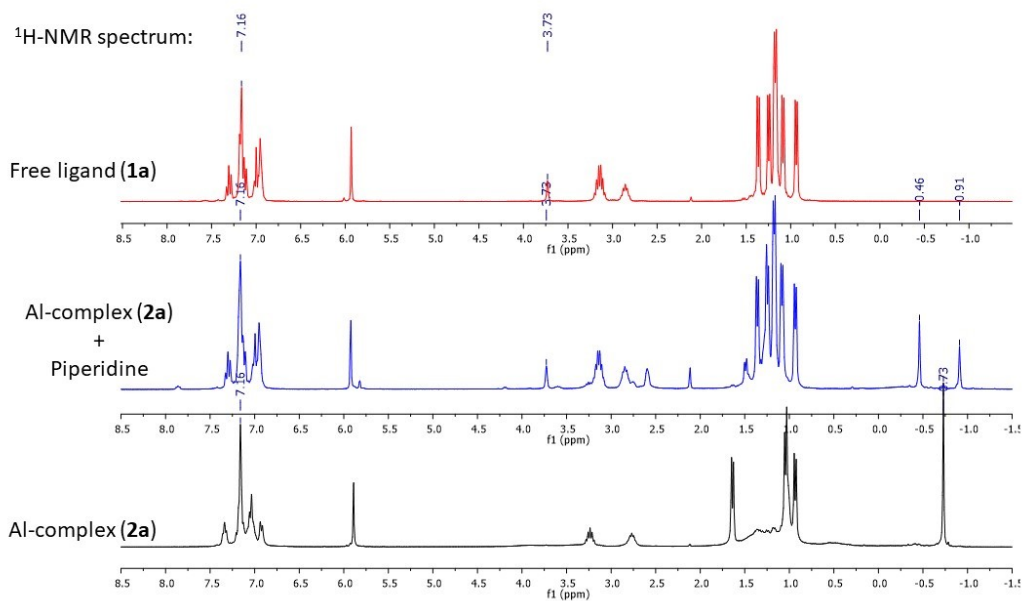

**Figure FS56.** <sup>1</sup>H NMR (300 MHz, 25 °C, C<sub>6</sub>D<sub>6</sub>) spectrum of stoichiometric reaction between complex **2a** and piperidine (1:2) after 5 h at 70 °C.

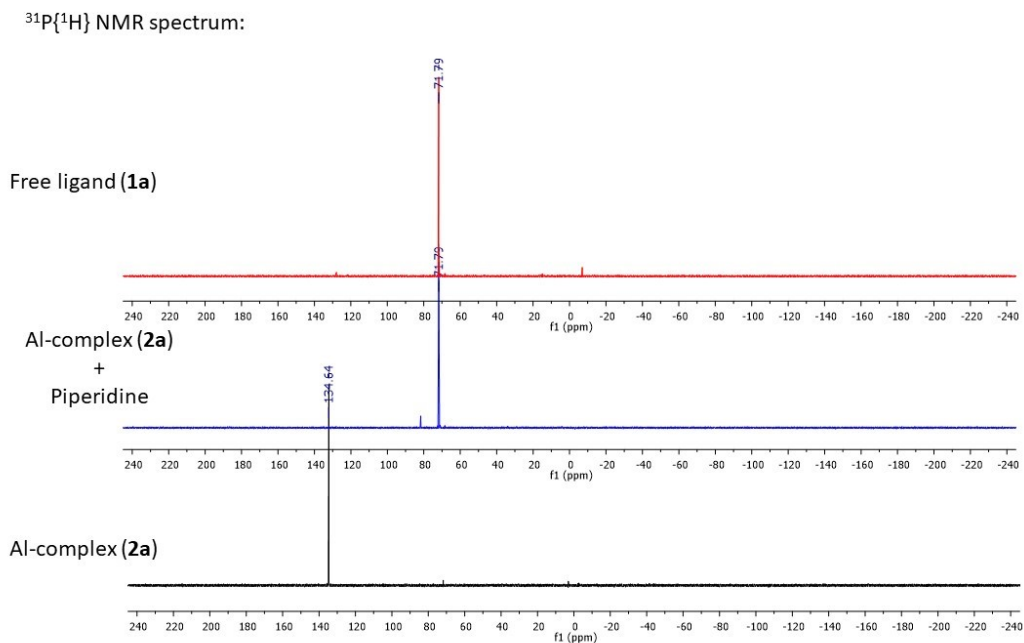

**Figure FS57.** <sup>31</sup>P{<sup>1</sup>H} NMR (300 MHz, 25 °C, C<sub>6</sub>D<sub>6</sub>) spectrum of stoichiometric reaction between complex **2a** and piperidine (1:2) after 5 h at 70 °C.

## References:

1. L. Xu, Z. Wang, W.-X. Zhang and Z. Xi, *Inorg. Chem.* 2012, **51**, 11941.
2. P. K. Vardhanapu, V. Bheemireddy, M. Bhunia, G. Vijaykumar and S. K. Mandal, *Organometallics* 2018, **37**, 2602.
3. Y. Gao, V. Carta, M. Pink and Jeremy M. Smith, *J. Am. Chem. Soc.* 2021, **143**, 5324.
4. T.-G. Ong, G. P. A. Yap and D. S. Richeson, *J. Am. Chem. Soc.* 2003, **125**, 8100.
5. Q. Li, S. Wang, S. Zhou, G. Yang, X. Zhu and Y. Liu, *J. Org. Chem.* 2007, **72**, 6763.
6. J. Koller and R. G. Bergman, *Organometallics* 2010, **29**, 5946.
